1  
2 **NAKED MOLE-RAT HEMATOPOIETIC STEM AND PROGENITORS ARE HIGHLY QUIESCENT WITH AN**  
3 **INHERENT MYELOID BIAS**

4  
5 Stephan Emmrich<sup>1,\*</sup>, Alexandre Trapp<sup>1</sup>, Frances Tolibzoda Zakusilo<sup>1</sup>, Marco Mariotti<sup>2</sup>, Maggie E.  
6 Straight<sup>1</sup>, Zhihui Zhang<sup>1</sup>, Spencer Gray<sup>1</sup>, Michael G. Drage<sup>3</sup>, Zhonghe Ke<sup>1</sup>, Masaki Takasugi<sup>1</sup>, Jan-  
7 Henning Klusmann<sup>4</sup>, Vadim N. Gladyshev<sup>2</sup>, Andrei Seluanov<sup>1</sup>, Vera Gorbunova<sup>1,\*</sup>

8 <sup>1</sup> Department of Biology, University of Rochester, Rochester NY 14627, USA.

9 <sup>2</sup> Division of Genetics, Department of Medicine, Brigham and Women's Hospital, Harvard  
10 Medical School, Boston, MA, USA.

11 <sup>3</sup> Pathology and Laboratory Medicine, University of Rochester Medical Center, Rochester,  
12 NY, USA.

13 <sup>4</sup> Pediatric Hematology and Oncology, Martin-Luther-University Halle-Wittenberg, Halle,  
14 Germany.

15 \* Corresponding authors. Email: [stephan.emmrich@rochester.edu](mailto:stephan.emmrich@rochester.edu),  
16 [vera.gorbunova@rochester.edu](mailto:vera.gorbunova@rochester.edu)

17  
18  
19 **Abstract**

20 Naked mole-rats (NMRs) are the longest-lived rodents yet their stem cell characteristics  
21 remain enigmatic. Here we comprehensively mapped the NMR hematopoietic landscape  
22 and identified unique features likely contributing to longevity. Adult NMRs form red  
23 blood cells in spleen and marrow, which is a neotenic trait. A myeloid bias towards  
24 granulopoiesis in concert with decreased B-lymphopoiesis defines the marrow  
25 composition, resembling fetal leukopoiesis. Very similar to primates, the primitive stem  
26 cell compartment is marked by CD34 and THY1. Remarkably, stem and progenitor  
27 respiration rates are as low as in human cells, while NMR cells show a strong expression  
28 signature for fatty acid metabolism. The pool of quiescent stem cells is higher than in  
29 mice, and the cell cycle of hematopoietic cells is prolonged. Our work provides a platform  
30 to study immunology and stem cell biology in an animal model of exceptional longevity.

31  
32 **Teaser**

33 Juvenile features of hematopoiesis shape the blood system of the longest-lived rodent.  
34

## 35 **Introduction**

36 The naked mole-rat (*Heterocephalus glaber*) emerged as an animal model of exceptional  
37 longevity and resistance to age-associated diseases (1). At the size of a mouse these  
38 rodents reach a lifespan of over 30 years in captivity and do not display increased  
39 mortality with aging (2). NMR cells feature higher translation fidelity due to split  
40 processing of 28S rRNA (3), express a unique splicing product from the senescence-  
41 inducing INK4/ARF locus and maintain ample high molecular weight hyaluronic acid  
42 (HMW-HA) responsible for the resistance of NMRs to solid tumors (4, 5).

43 The blood is the most regenerative tissue, producing  $>10^{14}$  cells per year in humans (6).  
44 Fostered by recent advances in single-cell transcriptomics (7), hematopoiesis is viewed as  
45 a continuum of individual cells that traverse the differentiation process from unprimed  
46 hematopoietic stem and progenitor cells (HSPCs) directly into unipotent progenitors (8).  
47 Studies of the unperturbed hematopoietic system are most advanced in their understanding  
48 of HSPC hierarchies and concepts of stemness in mice (9). There are, however,  
49 fundamental differences in certain aspects of the blood system between mice and humans  
50 (10). At the genetic level, orthologs for one of the major murine HSC markers, Sca-1  
51 (Ly6a), are found only in rodents but not in primates, carnivores, birds or fish.  
52 Interestingly, NMRs are among the few rodents without a Sca-1 ortholog (Table S1).

53 We developed a flow cytometry (FACS) labelling strategy using cross-reactive antibodies  
54 to sort, culture and transplant NMR hematopoietic stem and progenitor cells (HSPCs). A  
55 panel of six surface markers allowed to purify primitive stem cells with multi-lineage  
56 potential, distinct cell stages during early erythroid and T-lymphoid commitment (11) and  
57 distinguished the major blood leukocyte fractions. NMR HSPCs showed striking  
58 similarities to human HSPCs, such as a CD34<sup>+</sup> compartment harboring primitive  
59 progenitors, marrow granulopoiesis and slow cell metabolism. Further adaptations  
60 involved a prolonged cell cycle duration, splenic erythropoiesis and retention of juvenile  
61 platelet and leukocyte counts in aged animals, revealing systemic deviations from  
62 traditional concepts of hematopoiesis to concertedly promote longevity. Our findings  
63 provide a comprehensive resource for the studies of immunosenescence, ‘inflammaging’  
64 and stem cell biology in the naked mole-rat as a model of exceptional longevity.

65

## 66 Results

### 67 The developmental landscape of naked mole-rat hematopoiesis

68 To separate NMR hematopoietic cells, we screened 101 commercially available  
69 monoclonal antibodies (moAb; Table S7) against human, mouse, rat and guinea pig CD  
70 markers, and identified human CD11b, CD18, CD34 and CD90, mouse CD11b and  
71 CD125, rat Thy1.1 and guinea pig CD45 as cross-reactive to bind distinct subsets of  
72 viable NMR bone marrow (BM) cells (Fig. 1a). Antibodies were validated by isotypes, Fc  
73 blockers and cross-species comparison (Fig. S1a-b).

74 When we stained red blood cell (RBC)-depleted NMR peripheral blood (PB) with Thy1.1  
75 and CD11b, the 5 major blood cell types could be distinguished: neutrophil granulocytes  
76 (GC), eosinophil granulocytes (EO), T cells (TC), B cells (BC) and monocytes (MO) (Fig.  
77 1b). Cytochemistry of FACS-purified cells revealed multi-lobulated nuclei and a pH-  
78 neutral cytoplasm for Thy1.1<sup>hi</sup>/CD11b<sup>+</sup> GCs and bi-lobulated nuclei with a high density  
79 of acidic granulation for Thy1.1<sup>int</sup>/CD11b<sup>+</sup> EOs, with both populations exhibiting  
80 granulocytic scatter properties (Fig. 1c, Fig. S1c). Two populations with lymphocytic  
81 morphology and size are labelled as Thy1.1<sup>int</sup>/CD11b<sup>-</sup> and Thy1.1<sup>lo</sup>/CD11b<sup>-</sup>, while  
82 Thy1.1<sup>-</sup>/CD11b<sup>+</sup> cells resemble MOs. BM labelling showed a distinct CD34<sup>hi</sup>/Thy1.1<sup>int</sup>  
83 population of monomorphic cells with small cytoplasm that was absent in PB. CD34 and  
84 CD90/THY1 are human stem cell markers (12); we thus hypothesized these cells to  
85 contain the HSPC compartment (Fig. 1d-e).

86 To increase cell type resolution we performed CITE-Seq (13) for CD11b, CD34 and  
87 Thy1.1 on sorted NMR PB and BM cell populations (Fig. 1f, Fig. S1d-e). A de novo  
88 transcriptome assembly from deep sampling of NMR whole marrow was prepared  
89 according to the FRAMA pipeline (14) and used for transcript annotation, which revealed  
90 hundreds of previously unannotated genes as well as thousands of novel transcript  
91 isoforms (Table S1, Fig. S1f-g). We referenced quality control data, clustering, cell cycle  
92 scoring and cell type annotation with a human and a murine droplet-based single-cell  
93 RNA-Sequencing (scRNA-Seq) datasets of hematopoietic hierarchies from the literature  
94 (Fig. S2-4, Table S2). Mapping of 11920 NMR orthologs to 22561 cells yielded 14  
95 clusters which displayed a densely interconnected map of hematopoietic development  
96 (Fig. 1g). NMR hematopoietic cell types expressed canonical lineage markers and are  
97 associated with corresponding gene signatures in gene set enrichment analysis (GSEA;  
98 Fig. 1h, Table S2). The PB or BM fraction CITE counts each confirmed their FACS  
99 staining pattern for the indicated clusters (Fig. 1i-j). We identified a megakaryocytic-

erythroid progenitor (MEP) cluster overexpressing both GATA1 and GATA2, maintaining CD34 and downregulating Thy1.1 levels. While MEPs resemble progenitor morphology, CD34<sup>-</sup> ERY cells mostly contain RBCs and reticulocytes (Fig. 1d-e). Canonical cell cycle marker expression revealed the HSPC cluster almost exclusively in G1, matching earlier findings of fate decisions uncoupled from cell division in mice (15). By contrast, multipotent progenitor (MPP), MEP, erythroblast (EB), B cell progenitor (BCP) and granulocyte monocyte progenitor (GMP) clusters have the highest G2/M and S phase signatures (Fig. S1h).

To confirm our annotations and to profile expression kinetics across cells and clusters we highlighted differentially expressed genes with conserved roles during hematopoiesis (16). Blended transcript expression showed strict confinement of NMR CYTL1, a bone mass modulator exclusively induced in human CD34<sup>+</sup> HSPCs (17), to HSPC/MPP clusters, whereas CD34 is also expressed in MEPs and BCPs (Fig. 1k). Across humans, mouse and NMR HOXA9 expression was found in the most primitive HSPC cluster, with TM4SF1 specific for NMR HSPCs, whereas TM6SF1 as a marker of lymphomyeloid differentiation is conserved in rodents (Fig. S1i, 2f, 3f). Midkine (MDK), a pleiotropic growth factor, emerged as a specific marker of NMR MEPs. Similar to human and mice however, NMR GATA1 determined erythroid commitment by specific expression in MEPs, EBs and erythroid cells (ERY), while GATA2 was expressed in HSCs and an MPP subset to merge with GATA1 in MEPs and early EBs (Fig. 1k, Fig. S2e, 3e). Interestingly, GP9, expressed at the surface of platelets, was specifically produced in MEP cells not expressing GATA2. This suggests NMR MEPs differentiate through a GATA2-dependent switch between the erythroid route along GATA1<sup>+</sup>/GATA2<sup>+</sup>/EPOR<sup>+</sup> vs the GATA1<sup>+</sup>/GATA2<sup>-</sup>/GP9<sup>+</sup>/CLEC1B<sup>+</sup> axis towards megakaryoblasts. In the lymphoid branch we found three developmental stages of CD20<sup>+</sup> B cell clusters, with BCP showing exclusive expression of VPREB1, located on proB and preB cells (Fig. 1k). Cluster BC maintained VPREB3 overexpression, suggesting broad species conservation of successive VPREB gene waves as required for BC development. PU.1 (SPI1) is a transcription factor of the myeloid lineage with a role in HSC maintenance (18). Likewise, SPI1 was induced in naked-mole-rat MPPs in close proximity to GMPs (Fig. 1g-k), its absence in MEPs suggests conservation of the classic GATA1-PU.1 bi-modal switch. Thus SPI1 expression in the HSPC compartments marks the onset of myeloid commitment, converging with CEBPE into the granulocytic lineage, a pattern conserved in mouse (Fig. S3e). Strikingly, an algorithm which captures patterns in high-dimensional data without referral to prior

134 clustering (19), projected HSC/HSPC clusters as central hubs connecting between clusters  
135 of the three major lineages (erythroid, lymphoid, myeloid) throughout every species and  
136 dataset we tested (Fig. 1l, Fig. S2g, 3g).

137 In summary, we established a cross-reactive FACS antibody panel to purify HSPC and  
138 mature blood cell populations and mapped the major hematopoietic lineages in NMRs.

### 139 **The naked mole-rat spleen is the major site of erythropoiesis**

140 One of the first milestones towards prospective isolation of HSCs was the early notion that  
141 the cell fraction with hematopoietic regenerative potential was nearly devoid of markers of  
142 mature blood cell types (20). We thus designed an NMR lineage depletion cocktail (LIN)  
143 from the validated cross-reactive antibodies consisting of CD11b/CD18/CD90/CD125,  
144 which purified HSPCs as demonstrated by significantly higher colony formation than  
145 LIN<sup>+</sup> or total BM (Fig. 2a-c, Fig. S4c). The LIN<sup>+</sup> fraction strongly enriched Thy1.1<sup>hi</sup> GCs,  
146 and to a lesser extent TCs and BCs according to their Thy1.1 label intensity in PB  
147 populations (Fig. 1b). CD11b and CD18 both form the integrin Mac-1, marking myeloid  
148 or NKC commitment. Moreover, we found that the anti-rat Thy1.1 MoAb labels additional  
149 cells not commonly stained with anti-human CD90 MoAb in BM, most likely due to  
150 different epitopes, each with a proteoform-specific label for NMR THY1 (Fig. S4d).  
151 Scatter backgating demonstrated that CD90<sup>hi</sup>/Thy1.1<sup>hi</sup> cells were  
152 neutrophils, while dim CD90<sup>lo</sup>/Thy1.1<sup>int</sup> cells had lymphoid scatter properties. We  
153 therefore used CD90 antigen to deplete committed cells from the Thy1.1 label. CD125,  
154 the IL-5 receptor alpha subunit, is primarily expressed on eosinophils and activated BCs  
155 (21). Indeed, BCs were the sole fraction positive for CD125 in PB, while TCs, EOs and  
156 GCs were gradually labelled by CD90 (Fig. 1b, Fig. S4e). Most cells of the LIN<sup>-</sup> fraction  
157 were Thy1.1<sup>-</sup>/CD34<sup>-</sup> (CP7; candidate population), resembling committed cells not  
158 covered by the NMR LIN cocktail (Fig. 2c). Surprisingly, both LIN<sup>+</sup> and LIN<sup>-</sup> contain a  
159 Thy1.1<sup>int</sup>/CD34<sup>hi</sup> population, which we termed CP1 and CP2, respectively. CP3 is LIN<sup>-</sup>  
160 /Thy1.1<sup>lo</sup>/CD34<sup>hi</sup>, CP4-5 are LIN<sup>-</sup>/Thy1.1<sup>-</sup>/CD34<sup>hi</sup> and LIN<sup>-</sup>/Thy1.1<sup>-</sup>/CD34<sup>lo</sup>,  
161 respectively, while LIN<sup>-</sup>/Thy1.1<sup>lo</sup>/CD34<sup>-</sup> is CP6. Checking which LIN factor is  
162 differentially expressed on Thy1.1<sup>int</sup>/CD34<sup>hi</sup> cells we found CD11b and CD90 absent in  
163 CP7 and CP2 but present in CP1 and in most viable Thy1.1<sup>int</sup>/CD34<sup>hi</sup> cells, all four being  
164 negative for CD125 (Fig. S4f). We subset CP1 and distinct cell populations of the LIN<sup>-</sup>  
165 fraction and found each of CP1, CP2 and CP3 were <1% of total BM leukocytes (Fig. 2d),  
166

167 the frequency of the mouse  $LIN^{-}/Sca-1^{+}/Kit^{+}$  (LSK) hematopoietic stem and progenitor  
168 cell compartment (Fig. S8c) (22).

169 In most mammals the spleen primarily acts to recycle aged erythrocytes (23). However,  
170 species-specific adaptations have been found, such as the murine spleen acting as a  
171 reservoir of MOs or the equine spleen as a storage of up to 30% RBCs (24, 25). We  
172 observed a drastic difference in the LIN staining pattern as compared to BM with a  
173 strongly expanded  $LIN^{dim}$  population corresponding to elevated  $Thy1.1^{-}/CD34^{-/lo/hi}$  cells  
174 in NMR spleens (Fig. S4g). The frequencies of CP4 (2.3-fold), CP5 (3.5-fold) and CP6  
175 were significantly increased in spleens relative to BM (Fig. 2e-f). Likewise, we found  
176 increased RBC content in splenic vs marrow organ sections in NMRs but not in mice (Fig.  
177 S4a). Reanalysis of scRNA-Seq datasets (26) confirmed the progenitors and differentiated  
178 cells of the erythroid lineage in NMR spleens, which were absent in mice (Fig. S5, Table  
179 S3). Moreover, Benzidine-stained cytopins of whole spleens revealed significantly more  
180 RBCs in 3 year-old NMRs than 3 month-old mice (Fig. 2g-h). We further detected  
181 Benzidine<sup>+</sup> nucleated erythroid precursors in NMR but not mouse spleens. Strikingly, in  
182 adult mice where normal erythropoiesis is known to occur in the BM, the number of  
183 nucleated erythroid progenitors diminished 19-fold from BM to Spleen, in contrast to a 2-  
184 fold increase from BM to Spleen in NMRs (Fig. 2h), pointing towards shared splenic and  
185 medullary erythropoiesis. To link elevated nucleated erythroid progenitor levels with  
186 expansion of the  $Thy1.1^{-}/CD34^{lo/hi}$  compartment we sorted CP3 and CP4 cells from  
187 spleens for Benzidine staining (Fig. 2i). This clearly demonstrated an increase of  
188 nucleated erythroid progenitors along with a decline of CD34 expression from CP4 to  
189 CP5. Two weeks post-natal is the latest time point in ontogeny where active erythropoiesis  
190 takes place in the spleen (27), thus continuous utilization of splenic erythropoiesis  
191 throughout life can be considered a neotenic trait in NMRs. Consistently, Benzidine-  
192 stained colony assays showed an increase in the proportion of hemoglobin-containing  
193 colonies from CP1 (0.08) over CP2 (0.26) and CP3 (0.56) to CP4/5 (0.94/0.79; Fig. 2j).  
194 Notably CP1 colonies featured fewer mixed Benzidine<sup>+/-</sup> colonies than CP2, pointing  
195 towards lymphomyeloid lineage restriction of CP1 cells. We thus defined erythroid  
196 commitment in the  $LIN^{-}$  compartment by a gradual loss of Thy1.1, directly followed by  
197 successive downregulation of CD34.

198 The complete blood counts of NMRs showed higher hematocrit and RBC hemoglobin  
199 than mice (Fig. 3a-b). Total RBC numbers were lower than in mice and did not change  
200 with age (Fig. S2h-i). In contrast to murine blood leukocyte counts (Fig. S2j), there was no

201 increase in WBC with age in an NMR cohort spanning 12 years of age (Fig. 3c). Likewise,  
202 blood platelet levels increased in mice, but did not increase and were ~2-fold lower in  
203 NMRs (Fig. 3d, Fig. S4k). Hemanalyzer differential platelet counts between the two  
204 species were corroborated with RBC:PLT ratios obtained from Wright-Giemsa stained  
205 blood smears (Fig. S4l). Imaging of longitudinal femur sections showed fewer  
206 erythropoietic islets and Megakaryocytes (MKs) for NMR long bones as compared to  
207 mice (Fig. S4a-b).

208 Using the FACS gating from Fig. 1b we compared the major blood cell types to mice and  
209 found dramatically increased granulocytes and reduced BCs in NMRs (Fig. 3e),  
210 confirming the higher myeloid:lymphoid ratio (26). FACS-based blood cell  
211 quantifications were fortified by hemanalyzer measurements (Fig. S4m).

212 Shared splenic and medullary erythropoiesis may have evolved in NMRs as an adaptation  
213 to life in hypoxic conditions (28). Additionally, it also provides an alternative functional  
214 HSC niche throughout life, which may benefit longevity by sustaining youthful RBC  
215 production and preventing age-associated anemia. Moreover, NMRs did not display age-  
216 associated increase of blood leukocytes and platelets, pointing towards reduced chronic  
217 inflammation and delay of age-associated thrombosis.

### 218 **LTCs (LIN<sup>-</sup>/Thy1.1<sup>int</sup>/CD34<sup>hi</sup>) are the main source of naked mole-rat HSCs**

219 We next performed population RNA-Sequencing of sorted CP1-4 fractions to annotate  
220 their developmental status. Unsupervised clustering by t-distributed stochastic  
221 neighborhood embedding (t-SNE) separated transcriptomes in accordance with their  
222 immunophenotype (Fig. 4a). Due to the transition from LIN<sup>-</sup> to LIN<sup>+</sup> between CP2 and  
223 CP1 we checked which genes were successively downregulated during transition from  
224 LTCs (CP2) to CP1 and CP3/4 (Fig. 4b). We retrieved 116 genes showing this expression  
225 pattern, of which 40 are found in the LTC RNA-Seq signature (Table S4). A key finding  
226 was high expression of ID2, which blocks BC differentiation, can enhance erythropoiesis  
227 and expands HSCs (29, 30). LTCs also showed high expression of CD81, a tetraspanin  
228 which has been shown to maintain self-renewal in HSCs (31). Notably TM4SF1, the top  
229 marker of NMR HSPCs from the scRNA-Seq atlas (Fig. 1h), and the pluripotency marker  
230 EPCAM which facilitates reprogramming (32), are most abundant in LTCs.

231 Next we derived differentially expressed genes specific to each CP1-4 (Table S4).

232 Strikingly, the strongest GSEA association for CP3 were MEPs, while CP4 is negatively  
233 correlated with myeloid, lymphoid and HSPC signatures, and both share elevated  
234

235 expression of erythroid marker genes GATA1, EPOR, TFRs, KEL and FECH in CP3/4  
236 (Fig. 4c, Fig. S6a). CP1 was enriched with the most HSPC-associated genesets (Table S4).  
237 The human CD34<sup>+</sup> signature displayed an enrichment gradient from CP1 to CP4,  
238 revealing a Mac-1<sup>+</sup> primitive progenitor fraction with a stemness expression profile in  
239 adult NMRs.

240 The capacity to give rise to several distinct lineages via differentiation, referred to as  
241 multipotency, can be assayed through quantitation of progenitor frequencies during colony  
242 formation (33). We observed that NMR HSPCs grew best at 32°C in methylcellulose  
243 supplemented with human cytokines (Fig. S6b). Scoring of colony-forming unit (CFU)  
244 types was validated by cytochemistry of single colonies (Fig. S6c-d). Of all NMR BM  
245 populations only CP6 and CP7 did not grow in methylcellulose assays (Fig. S6e).  
246 Furthermore, the proportion of erythroid over total colonies declined from CP4/5  
247 (0.94/0.81) to CP3 (0.53), CP2 (0.29) and was lowest in CP1 (0.2). Myeloid output was  
248 not significantly different between CP1 and CP2 but decreased in CP3. Serial replating  
249 yielded 1.5-fold more total colonies for CP2 compared to CP1, although no colony type  
250 frequency was significantly altered between these two, as seen for original platings (Fig.  
251 S6f). Multipotency can further be assessed by transplantations into preconditioned  
252 immunodeficient hosts, through which high levels of sustained primary engraftments  
253 could be obtained in a variety of humanized mouse models (34). Given the successful *in*  
254 *vitro* growth of NMR HSPCs with human cytokines we reasoned that the NSGS mouse  
255 model with constitutive production of human IL-3, M-CSF and SCF would render optimal  
256 support to NMR xenografts (35). We indeed observed robust engraftment rates for CP2 at  
257 4 weeks post transplantation in recipient BM as compared to untransplanted mice (Fig.  
258 4d). Xenografts recapitulated the FACS staining pattern of naked mole-rat BM origin and  
259 could be separated from host cells, which are not labelled by validated NMR Thy1.1 and  
260 CD34 moAbs (Fig. S6g-j). At week 2 host BM chimerism resembled colony yields from  
261 methylcellulose assays with CP6/7 engraftments below background, supporting the notion  
262 that the NMR HSPC compartment is CD34<sup>+</sup> as in humans (Fig. 4e). All other populations  
263 produced clearly detectable engraftment in NSGS mice ranging from 1.6% (CP5) over  
264 4.2% (CP4) and 12.1% (CP3) to 14% (CP2) and 16% (CP1). Repopulation of host spleens  
265 was markedly reduced for all engrafted groups; strikingly CP3 was functionally classified  
266 as the most primitive committed erythroid progenitor and enriched in host spleens with  
267 higher engraftment than CP2 (Fig. 4f). Though FACS analyses verified xenograft cells in  
268 blood for CP1, CP2 and CP3, levels ranged below 1% of viable leukocytes (data not



269 shown). BM engraftment at week 4 for CP3 (1%) depleted earlier than for CP1 (12.8%,  
270  $p < 10^{-4}$ ) and CP2 (11.7%,  $p < 10^{-4}$ ) (Fig. 4g). The early loss of erythroid-primed CP3 is  
271 consistent with higher residual chimerism at week 8 for myeloid-primed CP1 compared to  
272 CP2 (5.3% vs 1.3%,  $p = 0.04$ ). Unexpectedly none of the three most primitive stem and  
273 progenitors or whole marrow (WBM) showed sustained BM engraftment past 12 weeks  
274 (Fig. S6k), a fact we primarily attribute to the difference in body temperature between  
275 NMRs (thermoneutral at  $\sim 32^{\circ}\text{C}$ ) and humans or mice, leading to niche stress on the graft  
276 and its depletion.

277 Next we quantified lineage commitment over time by selecting the  $\text{Thy1.1}^{+}/\text{CD34}^{+}$   
278 compartment of xenografts (HSPC, Fig. 4d). Although this rapidly depleted for all cell  
279 types at week 4, the initial replicative burst was greater in CP1 compared to CP2 (Fig. 4h),  
280 suggesting that CP1 cells are activated to a greater extent by the inflammatory host  
281 environment that ultimately exhausts engraftment. Xenograft  $\text{CD34}^{+}$  cells (ERY, Fig. 4d)  
282 resembling the erythroid lineage decline towards week 4 for CP1 and CP2, whereas CP3  
283  $\text{CD34}^{+}$  output remained similar (Fig. 4i). Conversely, we used  $\text{Thy1.1}^{\text{hi}}$  cells as myeloid  
284 output (GC, Fig. 4d), which revealed most efficient myelopoiesis at week 8 in CP1  
285 compared to CP2 and CP3 (Fig. 4j). B-lymphopoiesis in NMR BM is conserved (Fig. 1k,  
286 Fig. S2e, 3e), and since blood BCs are labelled by  $\text{Thy1.1}^{\text{lo}}/\text{CD11b}^{-}$ , we reasoned that CP6  
287 cells would contain marrow and spleen BCs, albeit with less purity. The xenograft  
288 lymphomyeloid population (LYMY, Fig. 4d) significantly dropped in CP3 cells at weeks  
289 4 and 8 but is more efficiently sustained in CP1 and CP2 with higher myeloid potential  
290 (Fig. S6l). Since the heterogeneity of this FACS fraction does not provide evidence over  
291 definitive B-lymphoid commitment in xenografts, we performed scRNA-Seq from week 4  
292 CP1 and CP2 grafts (Fig. 4k). Integrated analysis on both grafts identified a rare BC  
293 population amongst erythroid cells, HSPCs and 75% myelocytes (Fig. 4l, Fig. S6m, Table  
294 S5). Considering the exhaustive effect of the host BM niche a myeloid bias under stress  
295 hematopoiesis and inflammatory conditions is expected. CP2 clearly produced almost all  
296 BCs (6.5-fold to 4% total xenograft compared to 0.6% CP1), suggesting that lymphoid  
297 commitment within the primitive HSPC compartment is lost upon  $\text{Mac-1}/\text{CD90}$ -antigen  
298 expression at the onset of myelopoiesis in CP1. Concordantly, the CITE counts for  $\text{CD11b}$   
299 corresponded with LIN sorting between CP1/2 (Fig. S6n).

300 5-Fluorouracil (5-FU) eliminates cycling hematopoietic cells and activates the dormant  
301 HSC fraction to repopulate the BM (36), with a 150 mg/kg dose causing sublethal

302 myeloablation in mice. In same-sized NMRs however this dose led to complete mortality  
303 before day 15 post administration (Fig. 4m). At day 9 when BM is almost completely  
304 reconstituted in mice (37), the entire CD34<sup>+</sup> compartment in NMRs was lost leaving an  
305 aberrant LIN<sup>+</sup>/Thy1.1<sup>hi</sup>/CD34<sup>hi</sup> marrow GCP fraction (Fig. 4n). In terminal anemic  
306 animals erythroid Thy1.1<sup>-lo</sup>/CD34<sup>+</sup> fractions were not regenerated (Fig. S7a), strongly  
307 supporting that LTCs, which are not restored upon ablation, contain *bona fide* HSCs.  
308 Given a stronger Rhodamine 123 (Rho) efflux, which functionally enriches human and  
309 mouse HSCs (38, 39), in LTCs than in LSKs (Fig. S7b), the sensitivity to 5-FU is not  
310 caused by impaired drug transporter systems.

311 Altogether CP1 cells resemble CMPs, albeit with expression of Mac-1, CD90-antigen and  
312 a human-like HSPC signature. The lack of lymphoid development in xenografts points  
313 towards a primitive myeloid progenitor with severely decreased capacity of differentiating  
314 towards the erythroid lineage. Furthermore, we functionally defined the most primitive  
315 HSPC compartment as CP2 LTCs, exhibiting the highest degree of quiescence and  
316 multipotency. Our FACS panel effectively subsets the primitive HSPC compartment in  
317 NMRs, wherein diminished Thy1.1 expression of CD34<sup>+</sup> cells correlated with erythroid  
318 fate decision along the LTC-CP3/4 axis, while rising CD11b levels corresponded to  
319 myelopoiesis through LTC-CP1.

### 321 **Expansion of marrow granulopoiesis and the erythroid lineage at the expense of B-** 322 **lymphopoiesis**

323 Next we ran CITE-Seq on WBM from two 3 month-old and two 12 month-old mice  
324 (*mmu*) against WBM from two 3 year-old and two 11 year-old naked mole-rats (*hgl*; Fig.  
325 5a, Fig. S7c). We used canonical correlation analysis to integrate the four marrow libraries  
326 separately for each species (40). Louvain clustering found 15 communities from a total of  
327 19298 mouse marrow cells; conversely 14 communities in 21678 NMR marrow cells were  
328 detected (Fig. 5b), cluster annotation based on GSEA (Table S5). In mice cell types were  
329 strongly aligned with the CITE signals (Fig. S4d), e.g. a rare HSPC population of <1%  
330 total BM expressed ANGPT1, GATA2 and HOXA9 and had CITE-LIN<sup>-</sup>/Kit<sup>+</sup>/Sca-1<sup>-/+</sup>, co-  
331 clustering myeloid progenitors (LKs) and LSKs as the murine HSPC compartment.  
332 Likewise, NMR HSPCs overexpressed TM4SF1, GATA2 and HOXA9, and were CD11b<sup>-</sup>  
333 <sup>/lo</sup>/CD34<sup>+</sup>/Thy1.1<sup>-lo/int</sup>, suggesting LTCs, CP1 and CP3 collectively clustered as HSPC.  
334 Next we quantified cell types across species and grouped them into major branches (Fig.

335 5b). The most abundant fractions were GCs and granulocytic precursors (GCP),  
336 expressing conserved cell type markers, which account for ~50% WBM in mice and ~75%  
337 in NMRs. By contrast, the BC compartment with >26% in mice is reduced 4-fold to <7%  
338 in NMRs. As reported previously for spleen(26), there are no NKC's detected in NMR  
339 BM. Surprisingly, although the TC partition has the same frequency in both species, mice  
340 show a 2:3 ratio of CD4- vs CD8-TCs, NMRs a ratio of 5:1. In fact, by absolute copy  
341 number quantitation of sorted PB-TCs we determined a CD4:CD8 mRNA ratio of 1:3.5 in  
342 mice, which was inverted to 2.5:1 in NMRs (Fig. S7e). This pattern was confirmed in  
343 whole LNs with mature peripheral TCs as the primary source of CD4/CD8 expression,  
344 showing a 1:2.2 ratio in mice and 5.8:1 in NMRs (Fig. S7f). Hereby NMRs resemble  
345 humans rather than mice. The CD4:CD8 ratio is used to discriminate the risk of disease  
346 progression in HIV/AIDS and decreases with age in patients (41), a low CD4:CD8 ratio  
347 indicates immunosenescence and is associated with wide-ranging pathology (42). The  
348 unusually high CD4:CD8 ratio in NMRs suggests a reduced dependence on cell-mediated  
349 immunity.

350 Assuming a linear relationship between age groups across species, we compared  
351 differences in gene expression and cell type abundances of 12 month-old versus 3 month-  
352 old mouse BM with 11 year-old versus 3 year-old NMR BM. In mice no cluster  
353 abundance was significantly altered across age groups (Fig. 5g), however GSEA on 760  
354 differentially expressed genes across all clusters between age groups revealed 3  
355 upregulated terms related to proliferation and growth in older mice (Fig. S7g). Only CD8-  
356 TCs were significantly elevated in older NMRs to 1% of total BM cells (11-fold,  $q < 0.033$ ;  
357 Fig. 5h), which most likely reflected memory cell acquisition over age. There were no  
358 significantly associated pathways from the 978 differentially expressed genes. While we  
359 did not expect to find strong age-associated differences in gene expression between 3  
360 month-old and 12 month-old mice, long-lived NMRs retained a youthful BM composition  
361 at least for the first decade of their lifespan.

362 Next we integrated both species data using SCTransform (43), and overlaid species  
363 annotations on integrated clusters (Fig. 5c-f). We found 91.4% of mouse HSPCs and  
364 85.8% of NMR HSPCs mapping to the same integrated HSPC cluster, which commonly  
365 expressed stem cell markers such as HOXA9, KIT and ANGPT1 (Fig. 5j). Though this  
366 could lead to conclude a higher HSPC abundance in NMRs (0.54% *mmu* vs 2% *hgl*; Fig.  
367 5b), evidently myeloid-biased CP1 LIN<sup>+</sup>/Thy1.1<sup>int</sup>/CD34<sup>hi</sup> progenitors co-cluster with the

368 primitive HSPC compartment of both species, supported by transcriptional signatures of  
369 human HSC and CD34<sup>+</sup> cells associated with CP1 (Fig. 4c). Conversely, CITE-CD11b<sup>+</sup>  
370 HSPC cluster cells increased in older animals (Fig. S7h), and the HSPC cluster of older  
371 NMRs was expanded by ~2-fold, albeit not significant (Fig. 5h). Strikingly, both CP1 and  
372 CP2/LTC BM frequencies significantly increased with age, whereas erythroid progenitors  
373 remained constant (Fig. 3f-h, Fig. S4n). Therefore an intrinsic myeloid differentiation bias  
374 progressing with age is inherent to NMR HSPCs, akin to human HSCs (44).

375 Surprisingly, there were no NMR counterparts co-clustering with murine multipotent  
376 lymphoid progenitors (MLPs) within the integrated MLP community, thus mouse BM  
377 strongly enriched for MLPs (59-fold,  $q < 10^{-9}$ ; Fig. 5f). Mouse MLPs had lower levels of  
378 stem cell factors Lmo2 and Pbx1 than HSPCs, instead shared markers upregulated  
379 throughout the B-lineage such as Ets1, Fli1, Cd48, Il7r, Tcf3, and showed specific  
380 overexpression of Tcf4, Irf8 and Flt3 (Fig. 5i).

381 NMR cells mapping to the integrated MLP population were annotated as MOs in the  
382 single-species clustering (Fig. 5e) and overexpressed IRF8 and TCF4 but not IL7R or  
383 LMO2. As the earliest HSPC-to-B-transition intermediate MLPs were accumulated along  
384 with ProBCs, PreBCs (both 21-fold,  $q < 10^{-6}$ ) and BCs (10-fold,  $q < 10^{-5}$ ) in mouse BM (Fig.  
385 5f). Evidently the significant B-lineage reduction in NMRs manifests from primitive  
386 progenitors to mature BCs. However, in NMR BM a rare population with high expression  
387 of JCHAIN, MZB1, XBP and EAF2 likely comprised germinal center B or plasma cells  
388 (PC; Fig. 1h, Fig. S5, 7d). Intriguingly, there are more PCs in NMR BM than in mice (Fig.  
389 5f). The higher CD4-TC abundance combined with a compressed BC compartment leads  
390 to a higher CD4:APC (antigen presenting cell) ratio and could more efficiently activate  
391 BCs, relative to their total frequency, resulting in more plasmablastoid differentiation. On  
392 the other hand, increasing the amount of the terminal effector cell, e.g. through lower cell  
393 turnover, could have evolved to compensate a less abundant BC compartment.

394 Mouse megakaryocytic/erythroid/mast cell progenitors (MEMP) form a distinct cluster in  
395 mouse whole marrow, which is reformed upon integration of both species (MEP), of  
396 which the NMR fraction derived from HSPCs (Fig. 5b-e). We observed splenic  
397 erythropoiesis as the primary route to NMR RBC production, however the increase of  
398 erythroid cells in BM (11-fold,  $q < 10^{-5}$ ) suggested a higher prevalence of erythroid  
399 commitment (Fig. 5f). Surprisingly mouse BM contained 22-fold more MEPs ( $q < 10^{-6}$ ),  
400 supported by GATA1/GATA2 co-expression common in MEPs of both species (Fig. 5j).  
401 Mouse early megakaryoblasts are GATA2<sup>+</sup>/GATA1<sup>lo</sup> (Fig. S3e), as were integrated mouse

MEPs, whereas integrated naked mole-rat MEPs expressed GATA2<sup>+</sup>/GATA1<sup>hi</sup> (Fig. 5j). This is further in line with reduced BM MKs and PB platelets in naked mole-rats. In summary we have shown that naked mole-rat BM maintains a myeloid bias towards granulopoiesis, accompanied by reduced B-lineage commitment. A stem cell state was portrayed by pervasive expression of TM4SF1, the top HSPC marker by fold-change, highest expression in LTC and most specific for NMR HSPCs across species. Erythropoiesis is favored over megakaryopoiesis in NMR marrow, contributing to maintenance of low platelet levels in PB.

### **Naked mole-rat HSPCs display low metabolism and slow cell cycling**

Since CITE-Seq driven cell type annotations matched HSPC FACS populations, we examined sorted population level transcriptomes of corresponding developmental stages across species (Fig. 6a, Fig. S8a-e). A comprehensive collection of distinct human and murine HSPC stages was retrieved from GEO and integrated with bulk RNA-Seq data from human and NMR. The dataset of 9422 orthologs across 218 transcriptomes was segregated into 3 groups, primitive (LT-HSC, MPP), lymphomyeloid and erythroid progenitor. Using GSEA with MSigDB hallmark genesets we found that mouse cells through all stages were enriched in mitotic and pro-proliferative pathways (Fig. 6a). Interestingly, functional annotation of scRNA-Seq cluster signatures across species showed mouse HSPCs and several more committed cells enriched in pro-proliferative pathways over their NMR counterparts (Fig. S7i). Human HSPCs scored high for apoptosis, glycolysis and OXPHOS pathways, whereas NMR HSPCs strongly enriched for adipogenesis, cholesterol homeostasis and fatty acid oxidation (FAO) related terms. Indeed a plasma metabolite signature of multiple upregulated lipid sub-classes have been reported earlier (45). FAO provides the substrates for OXPHOS, while Aldehyde dehydrogenases (ALDH) neutralize aldehydes arising from processes such as lipid peroxidation. Notably, ALDH staining revealed 2-fold higher levels in LTCs compared to LSKs (Fig. S8f), indicating a countermeasure against elevated FAO activity.

Metabolic paradigms of HSCs are their reliance on glycolysis and low mitochondrial activity (46, 47). We measured mitochondrial respiration and glycolysis in sorted HSPCs from 3 species by the Seahorse assay (Fig. 6b, Fig. S8g). We found that human long-term (LT) HSCs and LTCs had the lowest metabolic profile, resembling quiescent cells. Mouse cells showed 2-4-fold higher respiration (OCR) and glycolysis-driven acidification than

435 their human and NMR counterparts, suggesting that quiescent mouse LT-HSCs have a  
436 higher basal metabolic rate. The mitochondrial mass of young mouse and NMR HSPCs  
437 are similar, whereas human HSPCs have less mitochondria (Fig. 6c, Fig. S8h). The  
438 mitochondrial membrane potential (MMP) as a resultant of OXPHOS and FAO is an  
439 indicator of mitochondrial activity. We reproduced (48) that old LSKs feature an increased  
440 fraction of cells with low MMP compared to young LSKs (Fig. S8i). Increased MMP in  
441 LTCs compared to LSKs was shown using Tetramethylrhodamine (TMRE) sequestration  
442 (Fig. 6d). Superoxide levels in LTCs were lower than those of LSKs (Fig. S8j). In line  
443 with seahorse metabolic profiles, intracellular reactive oxygen species (ROS) levels were  
444 higher in LSKs than in LTCs and human HSCs (Fig. S8k).

445 Within NMR HSPCs, a signature of actively cycling cells was enriched for CP1 and  
446 depleted for LTC (Fig. 4c). Pyronin Y staining confirmed more G<sub>0</sub> LTCs than CP1 (1.5-  
447 fold; Fig. 7b). Cell cycle scoring of BM scRNA-Seq clusters revealed 2-fold more mouse  
448 HSPCs in S phase compared to NMR HSPCs (Fig. 7a). Conversely, Ki67 staining showed  
449 a higher LTC G<sub>0</sub> fraction as compared to CP1 (3.4-fold) and mouse HSPCs (Fig. 7b). Next  
450 we performed Dual-Pulse labelling (49) by successive injection of EdU and BrdU to  
451 compare cell cycle kinetics *in vivo* (Fig. 7c). Using the EdU label together with DNA  
452 content staining we found a 3-fold increase in S-Phase LSKs over LTCs ( $p < 10^{-4}$ ; Fig. 7d,  
453 Fig. S9a-b). Committed progenitors of either species did not differ in their cell cycle  
454 properties. Combined subsequent use of 2 label incorporations allows quantitation of the  
455 cells entering S phase, excluding cells retaining the 1<sup>st</sup> label to purify cells in early S phase  
456 via the 2<sup>nd</sup> label (50). Cells in early S phase incorporate only BrdU (EdU<sup>-</sup>BrdU<sup>+</sup>). Cells in  
457 mid/late S phase are at DNA synthesis during both label administrations (EdU<sup>+</sup>BrdU<sup>+</sup>).  
458 Cells post S phase between the two labels incorporated only the first label (EdU<sup>+</sup>BrdU<sup>-</sup>).  
459 As expected, the CP3/4 progenitor partition showed markedly more mid/late and post S  
460 phase cells than the LTC stem cell compartment (Fig. 7e). Accordingly, the same pattern  
461 can be seen for mouse myeloid progenitor LKs versus LSK HSPCs. However, virtually all  
462 NMR cells did not show EdU<sup>-</sup>BrdU<sup>+</sup> early S phase cells (Fig. S9c-d). We thus conclude  
463 that the S/G<sub>2</sub>/M period in NMR cells extends beyond the typical 4h in mice (51).  
464 Consequently, even the highly proliferative CP3/4 fraction did not feature early S cells  
465 with the 2h between-label interval as compared to LKs (Fig. 7f), thus showing prolonged  
466 G<sub>1</sub>-S progression in NMRs.

467 Taken together, these data suggest that NMR HSPCs have evolved a mechanism of stem  
468 cell homeostasis involving elevated MMP and ALDH activity while maintaining a larger  
469 quiescent fraction of their total stem cell pool. OXPHOS through FAO is more energy-  
470 efficient and prevents lactate-caused cytoplasmic acidification, which likely contributes to  
471 preservation of quiescence and tissue homeostasis during aging.

472

## 473 Discussion

474 Naked mole-rats are the longest-lived rodents, and remarkably they remain healthy until  
475 the end of their lives and are resistant to age-related diseases including cancer. Adult stem  
476 cells are essential for maintenance and repair of tissues, thus NMR stem cell biology is of  
477 immediate interest to biomedical research.

478 Here we present a comprehensive analysis of the blood system in >100 NMRs including  
479 functional and molecular characterization of stem and progenitor subtypes and a primary  
480 landscape of the hematopoietic hierarchy. Surprisingly, many characteristics of the NMR  
481 hematopoietic system showed higher similarity to humans than to mice (Fig. 8). It had  
482 been proposed that long-lived NMRs, as well as humans, display neotenic traits compared  
483 to their short-lived relatives (52). Neoteny describes the preservation of juvenile  
484 characteristics in adulthood (53). The Axolotl remains in its highly regenerative larval  
485 stage unless ambient water supply ceases (54), the cave-dwelling Olm never leaves its  
486 larval stage and is predicted to live >175 years (55), and ‘immortal jellyfish’ of the genus  
487 *Turritopsis* manage to revert their sexually mature medusa stage into the budding polyp at  
488 any time, thus considered to have an indefinite lifespan (56). Even amongst these extreme  
489 cases humans are considered as neotenic apes due to traits such as orthognathy, body hair  
490 reduction, high relative brain weight and prolonged growth period. A remarkable increase  
491 of reproductive success with age (57) is just one of 43 neotenic traits listed (52). Splenic  
492 erythropoiesis and expansion of medullary granulopoiesis along with compression of the  
493 BC compartment are clear neotenic traits seen in NMRs. It is believed that neoteny is  
494 linked to longevity in Axolotl, Olm and human (52). Hence, the multiple neotenic features  
495 of the hematopoietic system we identified are likely linked to NMR longevity.

496 A striking feature of NMR stem cells was a higher proportion of cells in quiescence. The  
497 dynamic equilibrium between quiescence and specific cell cycle kinetics is a hallmark of  
498 adult stem cells, hence mouse HSCs have been shown to contain a dormant fraction of  
499 ~20% (58). Remarkably we found no significant differences in the frequencies of LTCs,  
500 LSKs and human CD34<sup>+</sup>/CD38<sup>lo</sup> HSPCs in normal BM (Fig. S8c), suggesting conserved  
501 stem cell pool frequencies. Our data suggest an expanded quiescent HSC pool in NMRs  
502 and rigid control of cell cycle genes at the transcriptional level (Fig. S1h, 2d, 3d). The  
503 enlarged quiescent HSC pool would benefit longevity by minimizing damage to stem cells  
504 and decelerating clonal expansion, which is a key feature of an aged hematopoietic system  
505 (59).



506 Strikingly, CITE-CD11b is correlated with loss of B-lymphopoiesis in xenografts,  
507 supporting the conclusion that LTCs transition into CD11b<sup>+</sup>/Thy1.1<sup>int</sup>/CD34<sup>hi</sup> myeloid-  
508 primed CP1. FACS quantitation revealed >4-fold increase of CP1 over LTCs in marrow  
509 and >3-fold in spleen (Fig. 2b-f), underscoring a myeloid differentiation bias in NMR  
510 hematopoiesis. BM scRNA-Seq revealed 2.5-fold increase of HSPCs in 11 year versus 3  
511 year old NMRs. The common HSPC cluster comprised LTC/CP1/CP3, and we showed  
512 that myeloid CP1 progenitors and LTCs increase with age, signs of clonal hematopoiesis  
513 in NMRs. However, while an oligopotent myeloid progenitor and the primitive stem cell  
514 compartment expand, there is no age-associated increase in PB-WBCs. Moreover, the  
515 megakaryocytic differentiation bias, a common hallmark of aging hematopoietic lineage  
516 trajectories (60), was not as evident in 11 year old NMRs as in 12 month old mice (Fig.  
517 5g-h). Remarkably, blood platelets did not elevate significantly in aged NMRs.  
518 Maintenance of youthful effector cell compositions despite myeloid progenitor expansion  
519 in middle-aged animals could be a direct result of an enlarged quiescent HSPC fraction in  
520 concert with a prolonged cell cycle, delaying peripheral manifestation of clonal  
521 hematopoiesis.

522 In summary, the entire hematopoietic system of naked mole-rats evolved a combination of  
523 unique or neotenic adaptations to an extended healthspan, such as diminished platelets and  
524 delay of age-associated leukocytosis, active hematopoiesis in the spleen, and as described  
525 in an accompanying report, additional cervical thymi and absence of thymic involution  
526 (11). On the molecular level all hematopoietic cells feature a slower G<sub>1</sub>-S-transition, stem  
527 and progenitors are less metabolically active than those from short-lived mice and the  
528 HSC compartment contains a higher fraction of quiescent cells. NMRs have evolved  
529 extreme longevity and resistance to almost all age-related diseases. Understanding the  
530 molecular mechanisms of these evolutionary adaptations can lead to novel strategies  
531 improving human health. Our resource provides a platform for using NMRs as a research  
532 model in stem cell biology, immunology, inflammation and the studies of systemic factors  
533 in aging.

## 534 **Materials and Methods**

### 535 **Animals**

536 All animal experiments were approved and performed in accordance with guidelines  
537 instructed by the University of Rochester Committee on Animal Resources with protocol  
538

539 numbers 2009-054 (naked mole rat) and 2017-033 (mouse). Naked mole rats were from  
540 the University of Rochester colonies, housing conditions as described (61). C57BL/6 mice  
541 were obtained from NIA, in comparative assays yLSK were sorted from 3-4 month and  
542 oLSK from 25 month old mice. Immunodeficient strain NSGS [NOD.Cg-  
543 *Prkdc<sup>scid</sup> Il2rg<sup>tm1Wjl</sup>* Tg(CMV-IL3,CSF2,KITLG) 1Eav/MloySzJ] was purchased from  
544 JAX.

### 545 546 **Primary cell isolation**

547 Marrow from mice and naked mole-rats was extracted from femora, tibiae, humeri, iliaci  
548 and vertebrae by crushing. Spleen, liver, thymus and lymph nodes were minced over a  
549 70µm strainer and resuspended in FACS buffer. Blood from mice was drawn via  
550 retroorbital capillary bleeding, naked mole-rat blood was obtained via heart puncture.  
551 Human marrow was obtained from the UPMC Pathology and Laboratory Medicine in  
552 accordance to RSRB STUDY00006161. Human BM cell fractions shown in Fig. 8 were  
553 based on Wintrobe's monograph (62) and cross referenced with Osgood et al (63); human  
554 marrow HSC fraction was approximated accordingly (44).

### 555 556 **Hematology Analyzer**

557 PB parameters were measured with a Vet ABC Plus+ (scil) Analyzer. Specifically, naked  
558 mole-rat and mouse samples were measured with the "mouse\_research" protocol (scil  
559 Tech Support, available upon request), which provides a 3-part differential in 17  
560 parameters.

### 561 562 **Histology**

563 Imaging and analysis was performed using a using a Nikon Eclipse Ti-S microscope.  
564 Coverslips were applied with DEPEX Mounting media (Electron Microscopy Sciences),  
565 except for Alkaline Phosphatase staining where Vectashield Hard Set Mounting Medium  
566 for Fluorescence (Vector) was applied. Femur bones were decalcified with 14% EDTA for  
567 a minimum of 2 weeks and stored in 10% neutral buffered formalin. Soft tissues were  
568 stored in 10% neutral buffered formalin, processing was done using a Sakura Tissue-Tek  
569 VIP 6 automated histoprocessor, paraffin embedding was done using a Sakura Tissue-Tek  
570 TEC 5 paraffin embedding center. A Microm HM315 microtome was used to section

571 tissues at a thickness of 5µm, which then were floated onto a slide with a water bath at a  
572 temperature between 45°C and 55°C. Sections were deparaffinized and rehydrated to  
573 distilled water through xylene and graded ethanol (100% to 70%).

574 *May-Grünwald-Giemsa*: Cytospins of whole spleen or WBM or sorted cells were prepared  
575 using a Rotofix 32A (Hettich) and stained at room temperature with May-Grünwald  
576 solution (Sigma) for 5min, washed in phosphate buffer pH 7.2 (Sigma) for 1.5min, and  
577 counterstained in 4.8% Modified Giemsa (Sigma) for 13min.

578 *Alkaline Phosphatase*: Cytospins were stained with the Alkaline Phosphatase kit (Sigma)  
579 according to manufacturer's instructions with the exemption of combining FBB-Alkaline  
580 Solution with Hematoxylin Solution, Gill No. 3 (Sigma) as counterstain.

581 *Benzidine Mayer's Hematoxylin*: Slides were fixed at room temperature with methanol for  
582 30sec, incubated with o-Dianisidine (Sigma) 1% in methanol for 1min and stained with  
583 H<sub>2</sub>O<sub>2</sub> 2.5% in ethanol for 30sec before rinsing for 15sec in water and counterstaining with  
584 Mayer's Hematoxylin Solution (Sigma) for 2min.

585 *Wright Giemsa*: Blood films were incubated with Wright-Giemsa Stain (Electron  
586 Microscopy Sciences) for 1min, rinsed briefly with water and developed in phosphate  
587 buffer pH 7.2 for 2min, then rinsed again. Slides were scored by taking 3 random  
588 micrographs of monolayers from the feathered edge of each sample to count both RBCs  
589 and platelets and average the technical replicates. Then mean RBC levels from the  
590 bloodcounter measurements (mouse, 9.1e<sup>12</sup>/l; naked mole-rat 5.4e<sup>12</sup>/l) were used to  
591 convert PLT/RBC ratios to a volumetric PLT count via bloodcounter by

592 
$$\frac{(RBC \times 10^{12}) \times (PLT_{count})}{l \times (RBC_{count})}$$

593 *Hematoxylin & Eosin*: Sections were stained with Mayers Hematoxylin (Sigma) for 1min  
594 and washed with tap water to remove excess blue coloring. Soft tissue sections were  
595 further decolorized with 3 dips in 0.5% acid alcohol and washed in distilled water. The  
596 nuclei of sections were blued in 1X PBS for 1 minute and washed again in distilled water.  
597 An Alcoholic-Eosin counterstain was applied for 30sec before slides were immediately  
598 dehydrated and cleared through 3 changes of 95% ethanol, 2 changes of 100% ethanol,  
599 and three changes of Xylene for 1min each.

600 *Microwave Giemsa for plastic marrow sections*: Paraffin-embedded Femora were  
601 subjected to the microwave modification of a conventional Giemsa stain, which we found

602 to produce clearer contrast of megakaryocytic cells as distinguished by their pale purple  
603 cytoplasm and abundant nuclear chromatin staining due to polyploidy. The stain was  
604 performed as described in [www.urmc.rochester.edu/urmc-labs/pathology](http://www.urmc.rochester.edu/urmc-labs/pathology). Slides were  
605 scored by taking 3 random micrographs of marrow from medullary canal for each sample  
606 to count polyploidy giant Megakaryocytes, average the technical replicates and convert  
607 micrograph pixel size via magnification to bone area in mm<sup>2</sup>.

### 608 **Methylcellulose colony assays**

609 Fresh sorted or whole BM naked mole-rat cells were tested to grow in mouse (M3434,  
610 SCT), rat (R3774, SCT) or human (H4435, SCT or HSC005, RnD Systems)  
611 methylcellulose formulations to show the highest colony numbers, colony sizes and cell  
612 viability with human cytokine cocktails. Either 1x10<sup>4</sup> whole marrow or 1x10<sup>3</sup> sorted  
613 naked mole-rat cells were added to 3ml of HSC005 supplemented with 1%  
614 Penicillin/Streptomycin and 1X GlutaMAX (both Thermo Fisher), equally divided into  
615 two 35mm dishes, grown for 21d at 32°C, 5% CO<sub>2</sub> and 3% O<sub>2</sub>, and scored. Although  
616 hematopoietic naked mole-rat cells will grow at 37°C, the total number as well as colony  
617 and cell type diversity is strongly enhanced at 32°C (data not shown). Colony assays  
618 grown at 37°C give rise to two types of colonies (erythroid vs myeloid), which are notably  
619 smaller than each of the 4 colony types we can distinguish at 32°C (Fig. S5b). Replatings  
620 were done by resuspending scored dishes at day 21 in FACS buffer, count cells and  
621 replate 1x10<sup>4</sup> cells into above growth conditions. CP3 cells did not grow substantially in  
622 the first replating, and a second replating had no sizable colonies for all naked mole-rat  
623 HSPC types. For Benzidine staining of naked mole-rat methylcellulose assays a 0.2%  
624 benzidine dihydrochloride (Sigma) solution in 0.5M acetic acid was prepared, which was  
625 supplemented with 0.24% of 50% H<sub>2</sub>O<sub>2</sub>. 1ml of this solution was layered carefully over  
626 each dish, and past 5min colonies were scored for the proportion of colonies which are  
627 uniformly benzidine-unreactive (color-less), uniformly benzidine-reactive (blue) and  
628 colonies containing both reactive and unreactive cells (mixed colonies containing both  
629 differentiated, hemoglobin containing and non-erythroid cells).

### 631 **Seahorse Assay**

632 Sorting for human (Fig. S8a), mouse (Fig. S8b) and naked mole-rat (Fig. 2a-c) marrow  
633 stem and progenitor population was used to purify live cells. Sorted cells were collected in  
634

635 Seahorse XF96 Cell Culture Microplates (Agilent Technologies) between  $50\text{-}250 \times 10^3$  cells  
636 per 200 $\mu$ l of the following culture media: Human LT-HSCs ( $\text{LIN}^-$   
637 / $\text{CD38}^{\text{lo}}/\text{CD34}^+/\text{CD45RA}^-/\text{CD90}^+$ ) in StemSpan Serum-free expansion medium (SFEM;  
638 Stemcell Technologies) supplemented with 100ng/ml human SCF, 100ng/ml human  
639 FLT3L, 20ng/ml human IL-6, 50ng/ml human TPO (all Peprotech), 0.75 $\mu$ M Stemregenin  
640 (SR-1; Stemcell Technologies Cat# 72342), modified as described (64). Human MPPs  
641 ( $\text{LIN}^-/\text{CD38}^{\text{lo}}/\text{CD34}^+/\text{CD45RA}^-/\text{CD90}^-$ ) in StemSpan supplemented with 50ng/ml hSCF,  
642 50ng/ml hFLT3L, 10ng/ml hIL-3, 10ng/ml hIL-6, 20ng/ml hTPO (all Peprotech), 0.25%  
643 Chemically defined lipid concentrate (CDLC; ThermoFisher Cat# 11905031). Human  
644 oligopotent progenitors (hOPP;  $\text{LIN}^-/\text{CD38}^{\text{hi}}/\text{CD34}^+$ ) in RPMI with 10% FBS (both  
645 Gibco), 1% GlutaMAX<sup>TM</sup> (Thermo Fisher), 5ng/ml hSCF, 5ng/ml hGM-CSF, 5ng/ml hIL-  
646 3. Mouse LT-HSCs ( $\text{LIN}^-/\text{Sca-1}^+/\text{Kit}^+/\text{CD48}^-/\text{SLAM}^+$ ) in the long-term HSC expansion  
647 cocktail (65). Mouse MPPs ( $\text{LIN}^-/\text{Sca-1}^+/\text{Kit}^+/\text{CD48}^+/\text{SLAM}^-$ ) in StemSpan with 1%  
648 GlutaMAX<sup>TM</sup>, 10ng/ml mSCF, 20ng/ml mTPO (all Peprotech), 10ng/ml mFGF1 (all  
649 Peprotech), 20ng/ml mIGF2 (BioLegend Cat# 588204). Mouse  $\text{LIN}^-/\text{Kit}^+/\text{Sca-1}^-$  (LK;  
650 mOPP) in StemSpan with 10% FBS, 10ng/ml mSCF, 10ng/ml mIL-3, 10ng/ml mIL-6 (all  
651 Peprotech). Naked mole-rat LTC ( $\text{LIN}^-/\text{Thy1.1}^{\text{int}}/\text{CD34}^{\text{hi}}$ ; CP2) in StemSpan with 1%  
652 GlutaMAX<sup>TM</sup>, 1% CDLC, 100ng/ml hSCF, 100ng/ml hFLT3L, 20ng/ml hIL-6, 50ng/ml  
653 hTPO, 1 $\mu$ M SR-1, 0.1 $\mu$ M UM-171 (Selleck Chemicals Cat# S7608). Naked mole-rat CPI  
654 ( $\text{LIN}^+/\text{Thy1.1}^{\text{int}}/\text{CD34}^{\text{hi}}$ ) in StemSpan with 1% GlutaMAX<sup>TM</sup>, 1% CDLC, 50ng/ml hSCF,  
655 50ng/ml hFLT3L, 20ng/ml hIL-6, 10ng/ml hGM-CSF, 1 $\mu$ M UM-729 (Stemcell  
656 Technologies Cat# 72332). Naked mole-rat CP3 ( $\text{LIN}^-/\text{Thy1.1}^{\text{lo}}/\text{CD34}^{\text{hi}}$ ; MEP) in  
657 StemSpan with 1% GlutaMAX<sup>TM</sup>, 1% CDLC, 50ng/ml hSCF, 50ng/ml hTPO, 1 U/ml  
658 hEPO (all Peprotech). All expansion cocktails were added with 1% Penicillin-  
659 Streptomycin (Thermo Fisher Cat# 15140163). Cells were allowed to settle for 16-20h at  
660 37°C (32°C for Naked mole-rat), 5% CO<sub>2</sub> and 0.5% O<sub>2</sub>. We used Corning Cell-Tak Cell  
661 and Tissue Adhesive (Thermo Fisher Cat# CB-40240) at 22.4 $\mu$ g/ml concentration per well  
662 to prepare Cell-Tak coated XF96 microplates according to the manufacturers guidelines  
663 (Agilent Technologies). Cells were seeded into the coated microplates immediately before  
664 the assay by centrifugation with 200g for 1min without brake. Subsequently we strictly  
665 adhered to the Seahorse XF Cell Mito Stress Test Kit protocol (Agilent Technologies Cat#  
666 103015-100). Cells were counted before and after the assay using a Celigo S Image  
667 cytometer (Nexcelom Biosciences) with automated 96-well Brightfield imaging at the  
668 URMC Flow core. All cells were assayed in Seahorse XF RPMI medium (Agilent

669 Technologies Cat# 103681-100). Final Well concentrations were 1.5 $\mu$ M Oligomycin,  
670 1 $\mu$ M FCCP and 0.5 $\mu$ M Rotenone/Antimycin A. Measurements were taken on a Seahorse  
671 XFe96 Analyzer in the URM C Flow core using Wave 2.6.1 software (Agilent  
672 Technologies).

## 673 **Flow Cytometry**

674 Flow cytometry analysis was performed at the URM C Flow Core on a LSR II or  
675 LSRFortessa (both BD), or on our labs CytoFlex S (Beckman Coulter). Kaluza 2.1  
676 (Beckman Coulter) was used for data analysis. Staining and measurement were done using  
677 standard protocols. Red blood cell lysis was done by resuspending marrow pellets in 4ml,  
678 spleen pellets in 1ml and up to 500 $\mu$ l blood in 20ml of RBC lysis buffer, prepared by  
679 dissolving 4.1g NH<sub>4</sub>Cl and 0.5g KHCO<sub>3</sub><sup>-</sup> into 500ml double-distilled H<sub>2</sub>O and adding  
680 200 $\mu$ l 0.5M EDTA. Marrow and spleen were incubated for 2min on ice, blood was lysed  
681 for 30min at room temperature. Cells were resuspended in FACS buffer (DPBS, 2mM  
682 EDTA, 2% FBS [Gibco]) at 1x10<sup>7</sup> cells/ml, antibodies were added at 1 $\mu$ l/10<sup>7</sup> cells, vortex-  
683 mixed and incubated for 30min at 4°C in the dark. DAPI (Thermo Fisher) @ 1 $\mu$ g/ml was  
684 used as viability stain. The primary gating path for all unfixed samples was: scatter-gated  
685 WBC (FSC-A vs SSC-A) => singlets1 (SSC-W vs SSC-H) => singlets2 (FSC-W vs FSC-  
686 H) => viable cells (SSC vs DAPI) == proceed with specific markers/probes.

687 Compensation was performed using fluorescence minus one (FMO) controls for each  
688 described panel. For antibody validation we incubated 1mio cells in 100 $\mu$ l Cell Staining  
689 Buffer (BioLegend; Cat# 420201) and added 5 $\mu$ l Human TrueStain FcX™ and 0.5 $\mu$ l  
690 TruStain FcX™ PLUS, followed by incubation for 10min at 4°C. We then proceeded  
691 with fluorescent antibody staining as above.  
692

693 Immunophenotyping of naked mole-rat BM, spleen, thymus, PB and lymph nodes: CD90  
694 FITC; CD125 PE; Thy1.1 PE-Cy7; CD34 APC, CD11b APC-Cy7. Quantification of  
695 murine BM SLAM HSCs was performed using mouse LIN Pacific Blue; Sca-1 BUV395;  
696 CD150 PE; Kit PE-Cy7; CD48 APC-Cy7. Quantification of human BM LT-HSCs was  
697 performed using human LIN Pacific Blue; CD34 APC; CD38 APC-Cy7; CD45RA FITC;  
698 CD90 PE-Cy7. Fluorescence minus one (FMO) controls were applied for fluorescent  
699 spillover compensations for each species and tissue used. All antibodies can be found in  
700 Table S7.

701 Sorting was performed at the UPMC Flow Core on a FACSAria (BD) using a 85µm  
702 nozzle, staining was done as described. Human HSCs were sorted for population RNA-  
703 Seq as LIN<sup>-</sup>/CD34<sup>+</sup>/CD38<sup>Lo</sup>/CD45RA<sup>-</sup>/CD90<sup>Dim</sup> (Fig. S5A). Naked mole-rat HSPC  
704 populations were sorted as described with a lineage cocktail comprised of CD11b, CD18,  
705 CD90 and CD125 (NMR LIN). Naked mole-rat marrow and spleen sorting panel was:  
706 NMR LIN Pacific Blue; Thy1.1 PE-Cy7; CD34 APC. Naked mole-rat blood sorting panel  
707 was: Thy1.1 PE-Cy7; CD11b APC-Cy7.

708 Molecular probing was performed on frozen aliquots from mouse and naked mole-rat BM.  
709 For each probe, cells were diluted in 1ml pre-warmed DMEM+ at 1x10<sup>6</sup> cells/ml. All  
710 stainings were performed simultaneously for 4-6 naked mole-rat, 2-4 old, 2-4 young mice  
711 and 4 human biological replicates. ALDEFLUOR (SCT) reagent was added at 0.5µl/ml,  
712 mixed and incubated for 15min at 37°C in a water bath. MitoStatus TMRE (BD) was  
713 added to 0.5x10<sup>6</sup> cells/ml with 25nM and incubated for 10min at room temperature in the  
714 dark. FCCP (Trifluoromethoxy carbonylcyanide phenylhydrazone) was added to negative  
715 controls at 5µM during TMRE staining. JC-1 (Thermo Fisher) was added at 1µM with or  
716 without 5µM FCCP and incubated for 15min at 37°C. MitoTracker Orange CMTMRos  
717 (Thermo Fisher) was added at 10nM and incubated for 45min at 37°C. MitoSOX red  
718 (Thermo Fisher) was added at 5µM and incubated for 30min at 37°C. CellROX Orange  
719 (Thermo Fisher) was added at 5µM and incubated for 60min at 37°C. The subsequent  
720 antibody staining was performed as above with 30min incubation on ice, panel was Sca-1  
721 (mouse) or CD34 (naked mole-rat) APC; Kit (mouse) or Thy1.1 (naked mole-rat) PE-Cy7;  
722 Lineage Cocktail V450. Rhodamine 123 staining was performed by incubating 1x10<sup>6</sup> cells  
723 for 30min with 1µg/ml Rho in HBSS+ (HBSS, 2% FBS, 10mM HEPES; all Gibco) at  
724 37°C, then cells were washed with 2ml HBSS+, spun down and reincubated for 15min at  
725 37°C.

### 726 **Pyronin Y staining**

728 Mouse and naked mole-rat BM cells from frozen aliquots were count-adjusted to 1x10<sup>6</sup>  
729 cells/ml and resuspended into 1ml of DMEM+ (DMEM high Glucose, 2% FBS, 10mM  
730 HEPES; all Gibco). Upon addition of 50µg/ml Verapamil (Sigma) and 5µM DyeCycle  
731 Violet (Thermo Fisher) cells were incubated for 45min at 37°C in a water bath, vortex-  
732 mixed every 15min. Past 45min 0.1µg/ml Pyronin Y was added to the reaction and  
733 incubated an additional 15min at 37°C, then washed with 3ml ice-cold Staining buffer

734 (HBSS [Gibco], 0.33M HEPES, 3.5% FBS, 0.02% NaN<sub>3</sub> [Sigma]). A subsequent antibody  
735 staining was performed as above with incubation on ice, panel was Sca-1 (mouse) or  
736 CD34 (naked mole-rat) APC; Kit (mouse) or Thy1.1 (naked mole-rat) APC-Cy7; Lineage  
737 Cocktail FITC; 500nM SYTOX Green (Thermo Fisher) was used as viability stain.

### 738 **Ki67 staining**

739 Mouse and naked mole-rat BM cells from frozen aliquots were count-adjusted to 1x10<sup>7</sup>  
740 cells/ml and antibody staining was performed as described, panel was Sca-1 (mouse) or  
741 CD34 (naked mole-rat) APC; Kit (mouse) or Thy1.1 (naked mole-rat) APC-Cy7; Lineage  
742 Cocktail FITC. For fixation and permeabilization we used the buffers from the BrdU Flow  
743 Kit (BD). Briefly, cells were fixed for 30min in Cytofix/Cytoperm on ice at 100μl/1x10<sup>6</sup>  
744 cells, permeabilized for 10min in CytopermPlus on ice at 100μl/1x10<sup>6</sup> cells, refixed for  
745 5min in Cytofix/Cytoperm on ice at 100μl/1x10<sup>6</sup> cells, all washes done with 1X  
746 Perm/Wash. Cells were resuspended in Staining buffer at 1x10<sup>7</sup> cells/ml, Ki67 antibodies  
747 (mouse: clone 16A8; naked mole-rat: clone Ki-67; both PE-conjugated, BioLegend) were  
748 added at 5μl/1x10<sup>6</sup> cells and incubated for 30min at room temperature in the dark, 1μg/ml  
749 DAPI was used as DNA stain.

### 750 **EdU-BrdU dual-Pulse labelling**

751 Mice aged 6 months or naked mole-rats aged 2-4 years were intraperitoneally (i.p.)  
752 injected with 1mg (2'S)-2'-Deoxy-2'-fluoro-5-ethynyluridine (F-ara-EdU; Sigma) from a  
753 10mg/ml stock in DMSO diluted with sterile 0.9% sodium chloride solution (Sigma).  
754 Exactly 2h later animals were i.p. injected with 2mg 5-Bromo-2'-deoxyuridine (BrdU;  
755 Sigma) from a 20mg/ml stock in DMSO diluted with sterile 0.9% sodium chloride  
756 solution (Sigma). Animals were euthanized for tissue harvest 30min post BrdU  
757 administration. Mouse and naked mole-rat BM cells from frozen aliquots were count-  
758 adjusted to 1x10<sup>7</sup> cells/ml. Antibody staining was performed as described before fixation,  
759 panel was LIN-V450/BV421, Sca-1 (mouse) or CD34 (naked mole-rat) APC, Kit (mouse)  
760 or Thy1.1 (naked mole-rat) APC-Cy7. We used the fixing and permeabilization buffers  
761 from the Click-iT EdU Plus Kit (Thermo Fisher). Antibody-stained cells were washed  
762 twice in PBS 1% BSA (Cell Signaling Technology), then resuspended with 100μl/1x10<sup>6</sup>  
763 cells Fixative and incubated for 15min at room temperature (RT) in the dark. cells were  
764 washed twice in PBS 1% BSA (Cell Signaling Technology), then resuspended with  
765  
766



767 100µl/1x10<sup>6</sup>cells Perm/Wash buffer and incubated for 15min at RT in the dark. Click-iT  
768 Plus reaction cocktail was prepared according to the Kit (Thermo Fischer), directly added  
769 to the permeabilization mix and incubated for 30min at RT in the dark. Cells were washed  
770 two times with Perm/Wash and resuspended in 100µl of 300µg/ml DNase1 into  
771 30µg/1mio cells, and incubated for 1h at 37°C in a waterbath. Cells were washed with  
772 Perm/Wash and stained with 1µl/1mio cells anti-BrdU from the FITC BrdU Flow Kit (BD  
773 Biosciences) for 20min at RT in the dark. For EdU cell cycle measurements no DNase1  
774 digestion and BrdU labelling was performed, instead cells were stained with 500nM  
775 SYTOX Green.

### 776 **Xenotransplantations**

778 Naked mole-rat BM and/or spleen cells were extracted, sorted and directly transplanted  
779 into 2.5Gy-irradiated (24h pre Tx) NSGS recipients between 5-9 weeks of age at cell  
780 doses between 50-100k sorted or 1-5mio whole marrow naked mole-rat cells. Injections  
781 were done via the retroorbital sinus, blood sampling was performed via maxillary vein or  
782 retroorbital plexus at weeks 4, 8 and 12. Hosts were culled at 2, 4, 8 or 12 weeks and  
783 engraftment frequencies were estimated by flow cytometry using only naked mole-rat  
784 markers not cross-reactive with mouse cells and CD45.1 (A20, BioLegend). Engraftment  
785 rates were adjusted for input cell dose to 100k/Tx. Gating path was WBC (FSC-A vs SSC-  
786 A) => singlets1 (SSC-W vs SSC-H) => singlets2 (FSC-W vs FSC-H) => viable cells (SSC  
787 vs DAPI) => NOT Thy1.1<sup>-</sup>/CD34<sup>-</sup> (CD34 vs Thy1.1) == engrafted naked mole-rat cells  
788 (Fig. 4d). One limitation for quantifying engraftment levels is that naked mole-rat BM  
789 features cells negative for the above markers which can arise from transplanted HSPCs as  
790 xenogenic CP7 (Fig. 4d). A cross-reactive guinea pig CD45 antibody does not stain >80%  
791 of naked mole-rat WBM cells and exhibits notable cross-reactivity with BM from NSGS  
792 recipients (Fig. S6g-j). We further detected cells double-positive for guinea pig CD45 and  
793 CD45.1. Cells stained as Thy1.1<sup>+</sup> and/or CD34<sup>+</sup> are clearly originated by the xenograft as  
794 untransplanted NSGS BM does not feature any Thy1.1 or CD34 labelled cells (Fig. 4d).  
795 Since all three different cell populations from guinea pig CD45 vs CD45.1 staining (DN,  
796 CD45.1<sup>+</sup>, CD45<sup>+</sup>/CD45.1<sup>-</sup>) contain a different pattern of cells stained as Thy1.1<sup>+</sup> and/or  
797 CD34<sup>+</sup>, we considered any cell positive for one or both markers as xenograft. We  
798 reasoned that due to the *in vitro* cross-reactivity of human SCF engraftment would be  
799 supported when using NSGS hosts. However, when we compared the engraftment

800 efficiency for  $\sim 1 \times 10^5$  LTCs transplanted into NSGB (NOD.Cg-  
801 *B2m<sup>tm1Unc</sup> Prkdc<sup>scid</sup> Il2rg<sup>tm1Wjl</sup>/SzJ*) or NSGS mice at 4 weeks and same cell dose between  
802 NSG (NOD.Cg-*Prkdc<sup>scid</sup> Il2rg<sup>tm1Wjl</sup>/SzJ*) and NSGS at 8 weeks, we found no significant  
803 differences between the strains (data not shown).

## 804 **5-FU treatments**

806 Mice aged 6 months or naked mole-rats aged 2-4 years were given intraperitoneal (i.p.)  
807 injections with 150mg/kg 5-Fluorouracil (5-FU; Sigma) from a 50mg/ml stock in DMSO  
808 diluted with sterile 0.9% sodium chloride solution (Sigma). Animals were monitored daily  
809 and euthanized moribundity.

## 810 **Quantitative PCR**

812 Mouse and Naked mole-rat sorted TCs and thymic tissue were used for RNA extraction by  
813 Trizol (Thermo Fisher). RNA was quantified using a NanoDrop One (Thermo Fisher), and  
814 100ng was used as input for the High Capacity cDNA Reverse Transcription Kit (Thermo  
815 Fisher). RT reaction was performed according to instructions and the 20 $\mu$ l reaction diluted  
816 to 200 $\mu$ l, of which 5 $\mu$ l were used per qPCR reaction. We used iTaq Universal SYBR  
817 Green Supermix (Bio-Rad) on a CFX Connect® RealTime System (Bio-Rad) with a  
818 three-step cycling of 10sec 95°C, 20sec 60°C, 30sec 72°C for 40 cycles. All primers  
819 (IDTDNA) were validated to amplify a single amplicon at the above PCR conditions by  
820 gel electrophoresis. Gene sequences for primer design by Primer3Plus were retrieved from  
821 ENSEMBL, with the exception of the T cell receptor C-region genes for naked mole-rat.  
822 Here we used the WBM RNA-Seq from the transcriptome assembly below to map those  
823 genes in a recently published naked mole-rat genome (66) using Apollo software and  
824 custom scripts. For absolute copy number quantitation, qPCR amplicons were gel-purified  
825 using the QIAquick Gel Extraction Kit (Qiagen) and subcloned into the pCR2.1 plasmid  
826 using the TOPO-TA cloning Kit (Thermo Fisher). Plasmids were prepared using the  
827 QIAprep Spin Miniprep Kit (Qiagen). Sanger sequencing was performed by Genewiz  
828 using M13 forward and reverse primers. Standard curves were prepared across a 10-fold  
829 dilution range from 20ag to 20pg of plasmid DNA. All amplicon gel images, amplicon  
830 plasmids and standard curve data is available upon request, Primers can be found in Table  
831 S7.

832

### 833 **Transcriptome assembly**

834 All Naked mole-rat RNA-Seq was performed with the [GRC URM C Rochester](#). RNA from  
835 whole bone marrow (WBM) was sequenced with ~230 million reads on a HiSeq2500v4  
836 (Illumina). Raw Illumina paired-end sequencing reads were assessed with FastQC.  
837 Rcorrector was used to correct sequencing errors and read pairs with uncorrectable errors  
838 were removed using a custom python script (GRC URM C Rochester). Adapter and base  
839 quality trimming was performed using trim galore and cutadapt resulting in high quality  
840 reads that were used as input to Trinity for assembly. FRAMA (14) was used to post-  
841 process the *de novo* assembly, including reduction of contig redundancy, ortholog  
842 assignment using human as a reference, correction of misassembled transcripts,  
843 scaffolding of fragmented transcripts and coding sequence identification. Quality  
844 assessment of the final FRAMA transcriptome was performed using BUSCO and  
845 TransRate. The transcriptome was mapped by blastn to the naked mole-rat genome  
846 (hetgla\_female\_1.0) or to transcript sequences annotated in ENSEMBL97. Mapped  
847 genomic coordinates of transcripts were thus compared to those of annotated genes using a  
848 custom python script. We found that 512 non-overlapping FRAMA transcripts (i.e., gene  
849 loci) were absent from the annotation, and another 5281 had >20% transcript length  
850 mapped to the genome but not matching annotated isoforms (Table S1).

851

### 852 **Population RNA-Seq**

853 RNA from sorted human and naked mole-rat populations was sequenced at ~100 million  
854 reads on a HiSeq2500v4 (Illumina), the SMARTer® Ultra® Low RNA Kit (Takara) was  
855 used for library preparation. All GEO datasets for human and mouse HSPC populations  
856 were acquired with SRA toolkit and processed from raw fastq files. Raw Illumina paired-  
857 end sequencing reads were subjected to base quality trimming using Trimmomatic and  
858 were assessed with FastQC. RSEM v1.3.0 with STAR aligner option was used to calculate  
859 expected counts and TPMs (67). We used a customized perl script to run RSEM with the  
860 FRAMA transcriptome as reference using bowtie2 aligner option. We also run RSEM with  
861 the ENSEMBL94 hetgla\_female\_1.0 annotation using STAR aligner option to confirm all  
862 clusterings and differential gene expression signatures for all naked mole-rat samples,  
863 results were almost identical to those obtained with FRAMA (data not shown).

864 Subsequent analysis was done with *R 4.0.2* and *Bioconductor* (68). Expected  
865 counts from different transcript isoforms of the same gene were added up to one unique  
866 identifier (uniquefy) using *ddply* and *numcolwise* functions of the *plyr* package, *edgeR*  
867 was used to calculate size factors with `method="RLE"` and computing CPMs. We applied  
868 *genefilter* to calculate the interquartile range (IQR) of CPMs with  $IQR(x) > 1$  to filter  
869 unexpressed and outlier genes; library-size normalized, IQR-filtered  $\log_2$ -transformed  
870 CPMs were *vst*-transformed by *DESeq2*, then a PCA from *stats* package was used as input  
871 for *Rtsne*. We applied *limma* to perform *voom*-transformation and select for differentially  
872 expressed genes (DEGs) with  $p < 0.05$  and  $\log$ -fold-change 1.

873 GSEA was performed using the *gsva* package with `method="ssGSEA"` using  
874 either the hematopoietic stem and progenitor geneset collection modified from Schwarzer  
875 & Emmrich et al (69) in Table S1 or the MSigDB v6.0 hallmark genesets with a p-value  
876 threshold of 0.05. All GSEA calculations were performed on the combined up- and  
877 downregulated DEG signature for each group, see Table S4. The *fGSEA* package was used  
878 to retrieve leading edge genes after reperforming GSEA under default conditions (70), the  
879 required gene rank metric was generated according to (71). All naked mole-rat population  
880 RNA-Seq DEG signatures (Table S4) were used to create genesets and were added to  
881 Table S1.

882 The expression gradient in Fig. 4b was calculated by a customized R function,  
883 which ordered the  $\log_2$ -transformed CPMs for each gene along their numeric value,  
884 allowing to filter out the genes subsequently changing expression from one group to  
885 another, see Table S4.

886 For the 3-species comparison uniquefied human, mouse and naked mole-rat TPM  
887 datasets (Fig. 6a, Fig. S8d-e) were merged based on HGNC symbols, then *genefilter* was  
888 used to calculate IQR of TPMs with  $IQR(x) > 1$  to filter unexpressed and outlier genes;  
889 The *TCC* package was used to calculate TMM-based size-factors. The function  
890 `betweenLaneNormalization` with median scaling from the *EDASeq* package was used to  
891 normalize for sequencing batch effects. We used the *RUVSeq* package to normalize TPMs  
892 for batch effects across datasets. The *limma* package was used to plotMDS of the full 3-  
893 species dataset (Fig. S8d), see Table S6 (sheet "metadata.population.RNA-Seq"). Next we  
894 split the dataset collection into three subsets based on developmental stage of each  
895 population. TPMs were *vst*-transformed by *DESeq2*, then a PCA from the *stats* package

896 was used as input for *Rtsne* (Fig. S8e); DGE and GSEA were performed as above using  
897 the population species as contrast and the MSigDB v6.0 hallmark genesets.

## 898 899 **Single cell RNA-Seq**

900 Naked mole-rat sorted CITE-Seq data (Fig. 1, Fig. S1): Marrow, blood and thymus cells  
901 from 2 animals aged 11m (♀ & ♂) were enriched by sorting. For BM we sorted CP1 3k,  
902 LTC 3k, CP3 2k, CP4 2k, CP5 2k, CP6 2k, CP7 3k, LIN<sup>+</sup>/CD34<sup>-</sup> 1.5k, LIN<sup>+</sup>/CD34<sup>+</sup> 1.5k;  
903 total 40,000 marrow cells from 2 animals as three 10X v2 chemistry libraries (2 replicates  
904 LIN<sup>-</sup> pooled, one replicate LIN<sup>+</sup> pooled; Fig. S1E). For PB we sorted GC 1.5k, MO 1k,  
905 BC 1k, TC 1.5k; total 10,000 peripheral blood leukocytes from same animals as above  
906 into one pooled 10X v2 chemistry library (Fig. S1D). For thymus we sorted CP8 1k, CP9  
907 1k, LTC 1k; total 6,000 thymocytes from same animals as above into one 10X v2  
908 chemistry library (Fig. S6H). Cells were pooled according to their tissue origins and  
909 processed for CITE-Seq using a [protocol](#) from the Stoeckius lab and the Chromium  
910 Single-Cell 3' Library & Gel Bead Kit v2 (10X Genomics)(13). Raw reads generated on  
911 the Illumina NovaSeq6000 sequencer were demultiplexed using [Cellranger 3.0.2](#) software  
912 in conjunction with Illumina's [bcl2fastq 2.19.0](#). *Cellranger* was also used to align the read  
913 data to the FRAMA *de novo* transcriptome assembly and ENSEMBL94  
914 *hetgla\_female\_1.0*, barcode count, UMI compress, and filter for "true" cells. CITE-Seq  
915 data for each capture was also demultiplexed using *bcl2fastq* and processed with *CITE-*  
916 *seq-Count 1.4.2* (72) given the antibody barcode sequences, a white list of filtered cell  
917 barcodes from the matching Cell Ranger "count" run, and parameters: "-cbf 1 -cbl 16 -  
918 umif 17 -umil 26".

919 Subsequent analysis was done with *R 4.0.2* and *Bioconductor*. The marrow and  
920 blood libraries were merged and FRAMA Trinity isoforms were uniquefied by row-wise  
921 addition of UMI-counts for each isoform of the same gene using a *data.table* snippet. 10X  
922 files were assigned to a *SingleCellExperiment* S4 class, and each gene without any counts  
923 in any cell was removed. We converted the S4 class into a *Seurat 3.1* object and added the  
924 CITE-signals in form of an independent "assay", barcodes were quality filtered to keep  
925 cells between 200-5,000 detected genes/cell and <25,000 counts per cell. RNA assay was  
926 log-normalized with "scale.factor = 1e4", CITE assay was "CLR" normalized. Variable  
927 features were detected with arguments *selection.method = "vst"*, *nfeatures = 3000*. Scores  
928 for G2M and S phases were obtained using *Seurat CellCycleScoring* as described in the

929 respective *Seurat* [vignette](#). Clustering was done using *Seurat*'s FindClusters function with  
930 resolution = 0.5. Next we used the doublet detection and removal workflow as suggested  
931 in the [Bioconductor OSCA vignette](#). Briefly, we run findDoubletCluster from the  
932 *scDbtFinder* package, followed by *in silico* simulation of doublets from the single-cell  
933 expression profiles (73) using computeDoubletDensity from *BiocSingular* package, and  
934 excluded any cluster which was identified in both methods. The DEGs for each cluster  
935 were detected by FindAllMarkers function with arguments test.use = "MAST",  
936 logfc.threshold = log(2), min.pct = 0.25, return.thresh = 0.05. Hematopoietic cell type  
937 annotation was done through *fGSEA* using the modified HSPC geneset collection (69),  
938 extended with the upregulated DEGs from the naked mole-rat population RNA-Seq  
939 analysis, upregulated DEGs from joint analysis of murine HSPCs from multiple studies  
940 (74-80), upregulated DEGs from human HSPC population RNA-Seq datasets (81-84),  
941 selected genesets from MSigDB and Immgen databases and example genesets from the  
942 [SingCellaR software](#) (Table S1). To determine the rank metrics for *fGSEA* the q-value  
943 requires to be transformed by  $-\log_{10}(\text{q-value})$  (71). *Seurat*'s FindAllMarkers function can  
944 generate 0 q-values (p\_val\_adj, Table S2) for high confidence hits, thus for any 0 we  
945 added the lowest q-value > 0 of the entire marker list for the group to test to each marker  
946 with q-value = 0. This generates ties in the pval ranking by *fGSEA* for the genes with  
947 modified 0 q-values, which are automatically resolved by retaining their order according  
948 to their fold-change of expression. A custom script was generated to pipe *fGSEA* with our  
949 HSPC geneset collection (Table S1) through each clusters marker genes, results are  
950 deposited in Table S2. The entire process was done in an iterative manner to condense  
951 multiple clusters of the same overabundant cell type (e.g. neutrophil granulocytes) into  
952 one partition, while maintaining distinctive low abundance clusters. Single cell expression  
953 maps (Fig. S1i, 2f, 3f) were done with *schex* package using nbins =  
954  $\text{dim}(\text{Seurat.object})[2]/200$ . *PhateR* was [used as suggested](#) by running an initial graph  
955 imputation, and obtaining the final graph with parameters knn=8, decay=100, t=25 (19).

956 **Human Cell Atlas data (Fig. S2):** The original data comprising 380,000 marrow cells from  
957 8 human donors is available from the [HCA data portal](#) or as the *HCAData R* package. We  
958 used a subset of this dataset available through the *SeuratData* package, randomly  
959 downsampled to 40,000 cells. The cell type annotation was obtained by [reference mapping](#)  
960 according to the *Seurat* vignette. The respective reference was created by weighted nearest  
961 neighbor analysis of CITE-Seq data from human marrow according to the *Seurat* [vignette](#)

962 (40). Variable features were detected with arguments `selection.method = "vst"`, `nfeatures =`  
963 `3000`. Cell cycle scoring and doublet detection were performed as described above.

964 Clustering and marker gene identification was done using the same parameters as for  
965 naked mole-rat sorted CITE-Seq data. Hematopoietic cell type annotation was done as  
966 described above (Table S2). *PhateR* was run with parameters `knn=3`, `decay=100`, `t=12`.

967 RNA-Magnet data (Fig. S3): We used the processed main dataset together with the prior  
968 cell type annotation (85). Barcodes of tissue type “bone” were excluded, leaving  $\text{Kit}^+$   
969 HSPCs, WBM and  $\text{CD45}^-$  cells in the dataset. Gene features were uniquefied with  
970 *data.table*, variable features were detected with arguments `selection.method = "vst"`,  
971 `nfeatures = 2000`. Cell cycle scoring and doublet detection were performed as described  
972 above. Clustering and marker gene identification was done using the same parameters as  
973 for naked mole-rat sorted CITE-Seq data. Hematopoietic cell type annotation was done as  
974 described above (Table S2). *PhateR* was run with parameters `knn=3`, `decay=100`, `t=28`.

975 Calico data (Fig. S5): We downloaded the raw fastq files for mouse and naked mole-rat  
976 scRNA-Seq from spleen (26) using SRA toolkit. *Cellranger 3.1.0* (10X Genomics) was  
977 used to generate reference and count matrices for mouse data from ENSEMBL99 or from  
978 FRAMA for naked mole-rat. Barcodes were quality filtered to keep cells between 200-  
979 2,500 detected genes/cell and <10,000 counts per cell. Gene features were uniquefied with  
980 *data.table*, variable features were detected with arguments `selection.method = "vst"`,  
981 `nfeatures = 2000`. Cell cycle scoring and doublet detection were performed as described  
982 above. Clustering and marker gene identification was done using the same parameters as  
983 for naked mole-rat sorted CITE-Seq data. Hematopoietic cell type annotation was done as  
984 described above (Table S3).

985 Xenograft data (Fig. 4m-n, Fig. S6m-n): Host WBM from frozen stocks were subjected to  
986 CITE-Seq using the Chromium Single-Cell 3' Library & Gel Bead Kit v3 (10X  
987 Genomics). Cells were processed for TotalSeq™ CITE reagents according to the  
988 [manufacturers instructions](#) (BioLegend), using both human and mouse Fc blocking  
989 reagents (BioLegend). Following fluorescent antibody staining samples were sorted for  
990 xenograft cells by Thy1.1/CD34 staining and excluding the “mouse” gate as shown in  
991 Figure 3G. For library preparations see below for 10X v3 chemistry. *Cellranger 3.1.0* was  
992 used to generate count matrices from both an ENSEMBL94 mouse reference and FRAMA  
993 for the same library. Gene features were uniquefied with *data.table*, barcodes were quality  
994 filtered to keep cells between 200-10,000 detected genes/cell and <20,000 counts per cell.

995 RNA assay was log-normalized with “scale.factor = 1e4”, CITE assay was “CLR”  
996 normalized. Variable features were detected with arguments selection.method = "vst",  
997 nfeatures = 3000. Libraries were integrated using FindIntegrationAnchors with dims =  
998 1:50, anchor.features = 3000, reduction = "cca". Mouse cells were removed by subsetting  
999 the integrated *Seurat* object. Cell cycle scoring and doublet detection were performed as  
1000 described above. Clustering and marker gene identification was done using the same  
1001 parameters as for naked mole-rat sorted CITE-Seq data. CITE feature/antibody marker  
1002 detection was done as described for transcript cluster markers with the exception of  
1003 test.use = “wilcox”. Hematopoietic cell type annotation was done as described above  
1004 (Table S5).

1005 Unfractionated BM data (Fig. 5, Fig. S7): 10,000 DAPI<sup>-</sup> BM cells from 2 mice aged 3m  
1006 (♀&♂) and 2 mice aged 12m (♀&♂), or 2 naked mole-rats aged 3yr (♀&♂) and 3 naked  
1007 mole-rats aged 11yr (♀&♂), were subjected to CITE-Seq using Chromium Single-Cell 3’  
1008 Library & Gel Bead Kit v3 (10X Genomics). Cells were processed for TotalSeq™ CITE  
1009 reagents according to the [manufacturers instructions](#) (BioLegend), using both human and  
1010 mouse Fc blocking reagents (BioLegend). Cellular suspensions were loaded on a  
1011 Chromium Single-Cell Instrument (10x Genomics, Pleasanton, CA, USA) to generate  
1012 single-cell Gel Bead-in-Emulsions (GEMs). Single-cell RNA-Seq libraries were prepared  
1013 using Chromium Next GEM Single Cell 3’ GEM, Library & Gel Bead Kit v3.1 (10x  
1014 Genomics). The beads were dissolved and cells were lysed per manufacturer’s  
1015 recommendations. GEM reverse transcription (GEM-RT) was performed to produce a  
1016 barcoded, full-length cDNA from poly-adenylated mRNA. After incubation, GEMs were  
1017 broken and the pooled post-GEM-RT reaction mixtures were recovered and cDNA was  
1018 purified with silane magnetic beads (DynaBeads MyOne Silane Beads, PN37002D,  
1019 ThermoFisher Scientific). The entire purified post GEM-RT product was amplified by  
1020 PCR. This amplification reaction generated sufficient material to construct a 3’ cDNA  
1021 library. Enzymatic fragmentation and size selection was used to optimize the cDNA  
1022 amplicon size and indexed sequencing libraries were constructed by End Repair, A-tailing,  
1023 Adaptor Ligation, and PCR. Final libraries contain the P5 and P7 priming sites used in  
1024 Illumina bridge amplification. In parallel, CITE-seq library amplification is performed  
1025 following SPRI bead purification of CITE-seq cDNA using Q5 Hot Start HiFi Master Mix  
1026 (New England Biolabs, Ipswich, MA), SI PCR primer (IDT, Coralville, IA), and indexed  
1027 TruSeq Small RNA PCR primers (Illumina, San Diego, CA) as specified(13). Amplified



CITE-seq libraries are purified using AMPure XP (Beckman Coulter, Indianapolis, IN) beads and quantified by Qubit dsDNA assay (ThermoFisher, Waltham, MA) and Bioanalyzer HSDNA (Agilent, Santa Clara, CA) analysis. CITE-seq libraries were pooled with 10x Genomics gene expression libraries for sequencing on Illumina's NovaSeq 6000. Barcodes were quality filtered to keep cells between 200-5,000 detected genes/cell and <20,000 counts per cell. RNA assay was log-normalized with "scale.factor = 1e4", CITE assay was "CLR" normalized. Variable features were detected with arguments selection.method = "vst", nfeatures = 3000. Canonical correlation analysis (CCA) was used to integrate libraries (40) from either species with FindIntegrationAnchors with dims = 1:50, anchor.features = 3000, reduction = "cca". Cell cycle scoring and doublet detection were performed as described above. Clustering and marker gene identification was done using the same parameters as for naked mole-rat sorted CITE-Seq data. CITE feature/antibody marker detection was done as described for transcript cluster markers with the exception of test.use = "wilcox". Hematopoietic cell type annotation was done as described above (Table S5). Differentially expressed markers between age groups for either species used FindMarkers with test.use = "MAST", logfc.threshold = log(2), min.pct = 0.1. Next we run *fGSEA* with the MSigDb hallmark geneset as mentioned in population RNA-Seq, and plot any pathway with FDR < 0.05 (Fig. S4G; no significant pathways for naked mole-rat markers across age). Differential abundance (DA), testing the cell abundances for clusters across conditions, was performed as described (86). Briefly, *edgeR* was used to apply negative binomial generalized linear model dispersion to each library as outlined in the [OSCA Bioconductor collection](#). SCTransform was used to integrate scaled, clustered and annotated mouse and naked mole-rat unfractionated BM datasets (43): SelectIntegrationFeatures with nfeatures = 3000, FindIntegrationAnchors with normalization.method = "SCT". Cell cycle scoring, clustering and marker detection performed as described above. Conserved markers were identified by running FindConservedMarkers for each cluster across species of the SCT-integrated dataset with test.use = "MAST", logfc.threshold = log(2), min.pct = 0.25. Differentially expressed markers per cluster between species run FindMarkers with test.use = "MAST", logfc.threshold = log(2), min.pct = 0.1. We performed *fGSEA* with the MSigDb hallmark geneset and plot any pathway with FDR < 0.05 (Fig. S4I).

## Quantification and Statistical Analysis

1061 Data are presented as the mean  $\pm$  SD. Statistical tests performed can be found in the figure  
1062 legends. P values of less than 0.05 were considered statistically significant. Statistical  
1063 analyses were carried out using Prism 9 software (GraphPad) unless otherwise stated.

1064 **References**

- 1065 1. V. Gorbunova, A. Seluanov, Z. Zhang, V. N. Gladyshev, J. Vijg, Comparative genetics of longevity and cancer:  
1066 insights from long-lived rodents. *Nat. Rev. Genet.* **15**, 531-540 (2014).
- 1067 2. J. G. Ruby, M. Smith, R. Buffenstein, Naked Mole-Rat mortality rates defy gompertzian laws by not increasing  
1068 with age. *Elife.* **7**, 10.7554/eLife.31157 (2018).
- 1069 3. J. Azpurua *et al.*, Naked mole-rat has increased translational fidelity compared with the mouse, as well as a unique  
1070 28S ribosomal RNA cleavage. *Proc. Natl. Acad. Sci. U. S. A.* **110**, 17350-17355 (2013).
- 1071 4. X. Tian *et al.*, INK4 locus of the tumor-resistant rodent, the naked mole rat, expresses a functional p15/p16 hybrid  
1072 isoform. *Proc. Natl. Acad. Sci. U. S. A.* **112**, 1053-1058 (2015).
- 1073 5. X. Tian *et al.*, High-molecular-mass hyaluronan mediates the cancer resistance of the naked mole rat. *Nature.* **499**,  
1074 346-349 (2013).
- 1075 6. J. T. Dancy, K. A. Deubelbeiss, L. A. Harker, C. A. Finch, Neutrophil kinetics in man. *J. Clin. Invest.* **58**, 705-  
1076 715 (1976).
- 1077 7. F. Paul *et al.*, Transcriptional Heterogeneity and Lineage Commitment in Myeloid Progenitors. *Cell.* **163**, 1663-  
1078 1677 (2015).
- 1079 8. L. Velten *et al.*, Human haematopoietic stem cell lineage commitment is a continuous process. *Nat. Cell Biol.* **19**,  
1080 271-281 (2017).
- 1081 9. E. Laurenti, B. Gottgens, From haematopoietic stem cells to complex differentiation landscapes. *Nature.* **553**, 418-  
1082 426 (2018).
- 1083 10. M. R. Copley, C. J. Eaves, Developmental changes in hematopoietic stem cell properties. *Exp. Mol. Med.* **45**, e55  
1084 (2013).
- 1085 11. S. Emmrich *et al.*, An ectopic cervical thymus and no thymic involution until midlife in naked mole-rats. *Aging*  
1086 *Cell.* **in press**(2021).
- 1087 12. M. Bhatia, J. C. Wang, U. Kapp, D. Bonnet, J. E. Dick, Purification of primitive human hematopoietic cells  
1088 capable of repopulating immune-deficient mice. *Proc. Natl. Acad. Sci. U. S. A.* **94**, 5320-5325 (1997).
- 1089 13. M. Stoeckius *et al.*, Simultaneous epitope and transcriptome measurement in single cells. *Nat. Methods.* **14**, 865-  
1090 868 (2017).
- 1091 14. M. Bens *et al.*, FRAMA: from RNA-seq data to annotated mRNA assemblies. *BMC Genomics.* **17**, 54-8 (2016).
- 1092 15. T. Grinenko *et al.*, Hematopoietic stem cells can differentiate into restricted myeloid progenitors before cell  
1093 division in mice. *Nat. Commun.* **9**, 1898-7 (2018).
- 1094 16. S. H. Orkin, L. I. Zon, Hematopoiesis: an evolving paradigm for stem cell biology. *Cell.* **132**, 631-644 (2008).
- 1095 17. Y. Shin, Y. Won, J. I. Yang, J. S. Chun, CYTL1 regulates bone homeostasis in mice by modulating osteogenesis  
1096 of mesenchymal stem cells and osteoclastogenesis of bone marrow-derived macrophages. *Cell. Death Dis.* **10**, 47-4  
1097 (2019).
- 1098 18. P. B. Staber *et al.*, Sustained PU.1 levels balance cell-cycle regulators to prevent exhaustion of adult  
1099 hematopoietic stem cells. *Mol. Cell.* **49**, 934-946 (2013).

- 1100 19. K. R. Moon *et al.*, Visualizing structure and transitions in high-dimensional biological data. *Nat. Biotechnol.* **37**,  
1101 1482-1492 (2019).
- 1102 20. C. E. Muller-Sieburg, C. A. Whitlock, I. L. Weissman, Isolation of two early B lymphocyte progenitors from  
1103 mouse marrow: a committed pre-pre-B cell and a clonogenic Thy-1-lo hematopoietic stem cell. *Cell.* **44**, 653-662  
1104 (1986).
- 1105 21. M. M. Huston, J. P. Moore, H. J. Mettes, G. Tavana, D. P. Huston, Human B cells express IL-5 receptor  
1106 messenger ribonucleic acid and respond to IL-5 with enhanced IgM production after mitogenic stimulation with  
1107 *Moraxella catarrhalis*. *J. Immunol.* **156**, 1392-1401 (1996).
- 1108 22. S. J. Morrison, I. L. Weissman, The long-term repopulating subset of hematopoietic stem cells is deterministic  
1109 and isolatable by phenotype. *Immunity.* **1**, 661-673 (1994).
- 1110 23. R. E. Mebius, G. Kraal, Structure and function of the spleen. *Nat. Rev. Immunol.* **5**, 606-616 (2005).
- 1111 24. I. Kunugiyama *et al.*, Measurement of erythrocyte volumes in splenectomized horses and sham-operated horses at  
1112 rest and during maximal exercise. *J. Vet. Med. Sci.* **59**, 733-737 (1997).
- 1113 25. F. K. Swirski *et al.*, Identification of splenic reservoir monocytes and their deployment to inflammatory sites.  
1114 *Science.* **325**, 612-616 (2009).
- 1115 26. H. G. Hilton *et al.*, Single-cell transcriptomics of the naked mole-rat reveals unexpected features of mammalian  
1116 immunity. *PLoS Biol.* **17**, e3000528 (2019).
- 1117 27. F. M. Wolber *et al.*, Roles of spleen and liver in development of the murine hematopoietic system. *Exp. Hematol.*  
1118 **30**, 1010-1019 (2002).
- 1119 28. H. J. Stutte, T. Sakuma, S. Falk, M. Schneider, Splenic erythropoiesis in rats under hypoxic and post-hypoxic  
1120 conditions. *Virchows Arch. A Pathol. Anat. Histopathol.* **409**, 251-261 (1986).
- 1121 29. P. van Galen *et al.*, Reduced lymphoid lineage priming promotes human hematopoietic stem cell expansion. *Cell.*  
1122 *Stem Cell.* **14**, 94-106 (2014).
- 1123 30. M. Ji *et al.*, Id2 intrinsically regulates lymphoid and erythroid development via interaction with different target  
1124 proteins. *Blood.* **112**, 1068-1077 (2008).
- 1125 31. K. K. Lin *et al.*, CD81 is essential for the re-entry of hematopoietic stem cells to quiescence following stress-  
1126 induced proliferation via deactivation of the Akt pathway. *PLoS Biol.* **9**, e1001148 (2011).
- 1127 32. I. I. Kuan *et al.*, EpEX/EpCAM and Oct4 or Klf4 alone are sufficient to generate induced pluripotent stem cells  
1128 through STAT3 and HIF2alpha. *Sci. Rep.* **7**, 41852 (2017).
- 1129 33. A. Roy *et al.*, Perturbation of fetal liver hematopoietic stem and progenitor cell development by trisomy 21. *Proc.*  
1130 *Natl. Acad. Sci. U. S. A.* **109**, 17579-17584 (2012).
- 1131 34. S. Goyama, M. Wunderlich, J. C. Mulloy, Xenograft models for normal and malignant stem cells. *Blood.* **125**,  
1132 2630-2640 (2015).
- 1133 35. M. Wunderlich *et al.*, AML xenograft efficiency is significantly improved in NOD/SCID-IL2RG mice  
1134 constitutively expressing human SCF, GM-CSF and IL-3. *Leukemia.* **24**, 1785-1788 (2010).
- 1135 36. C. Lerner, D. E. Harrison, 5-Fluorouracil spares hemopoietic stem cells responsible for long-term repopulation.  
1136 *Exp. Hematol.* **18**, 114-118 (1990).
- 1137 37. T. A. Venezia *et al.*, Molecular signatures of proliferation and quiescence in hematopoietic stem cells. *PLoS Biol.*  
1138 **2**, e301 (2004).

- 1139 38. N. Uchida *et al.*, Primitive human hematopoietic cells displaying differential efflux of the rhodamine 123 dye  
1140 have distinct biological activities. *Blood*. **88**, 1297-1305 (1996).
- 1141 39. N. Uchida, B. Dykstra, K. J. Lyons, F. Y. Leung, C. J. Eaves, Different in vivo repopulating activities of purified  
1142 hematopoietic stem cells before and after being stimulated to divide in vitro with the same kinetics. *Exp. Hematol.* **31**,  
1143 1338-1347 (2003).
- 1144 40. T. Stuart *et al.*, Comprehensive Integration of Single-Cell Data. *Cell*. **177**, 1888-1902.e21 (2019).
- 1145 41. J. L. Castilho *et al.*, CD4+/CD8+ ratio, age, and risk of serious noncommunicable diseases in HIV-infected adults  
1146 on antiretroviral therapy. *Aids*. **30**, 899-908 (2016).
- 1147 42. F. A. Huppert, E. M. Pinto, K. Morgan, C. Brayne, Survival in a population sample is predicted by proportions of  
1148 lymphocyte subsets. *Mech. Ageing Dev.* **124**, 449-451 (2003).
- 1149 43. C. Hafemeister, R. Satija, Normalization and variance stabilization of single-cell RNA-seq data using regularized  
1150 negative binomial regression. *Genome Biol.* **20**, 296-1 (2019).
- 1151 44. W. W. Pang *et al.*, Human bone marrow hematopoietic stem cells are increased in frequency and myeloid-biased  
1152 with age. *Proc. Natl. Acad. Sci. U. S. A.* **108**, 20012-20017 (2011).
- 1153 45. K. N. Lewis, N. D. Rubinstein, R. Buffenstein, A window into extreme longevity; the circulating metabolomic  
1154 signature of the naked mole-rat, a mammal that shows negligible senescence. *Geroscience*. **40**, 105-121 (2018).
- 1155 46. T. Simsek *et al.*, The distinct metabolic profile of hematopoietic stem cells reflects their location in a hypoxic  
1156 niche. *Cell. Stem Cell*. **7**, 380-390 (2010).
- 1157 47. N. Vannini *et al.*, Specification of haematopoietic stem cell fate via modulation of mitochondrial activity. *Nat.*  
1158 *Commun.* **7**, 13125 (2016).
- 1159 48. T. T. Ho *et al.*, Autophagy maintains the metabolism and function of young and old stem cells. *Nature*. **543**, 205-  
1160 210 (2017).
- 1161 49. O. Akinduro *et al.*, Proliferation dynamics of acute myeloid leukaemia and haematopoietic progenitors competing  
1162 for bone marrow space. *Nat. Commun.* **9**, 519-5 (2018).
- 1163 50. T. S. Weber, I. Jaehnert, C. Schichor, M. Or-Guil, J. Carneiro, Quantifying the length and variance of the  
1164 eukaryotic cell cycle phases by a stochastic model and dual nucleoside pulse labelling. *PLoS Comput. Biol.* **10**,  
1165 e1003616 (2014).
- 1166 51. M. R. Dowling *et al.*, Stretched cell cycle model for proliferating lymphocytes. *Proc. Natl. Acad. Sci. U. S. A.*  
1167 **111**, 6377-6382 (2014).
- 1168 52. V. P. Skulachev *et al.*, Neoteny, Prolongation of Youth: From Naked Mole Rats to "Naked Apes" (Humans).  
1169 *Physiol. Rev.* **97**, 699-720 (2017).
- 1170 53. E. Bufill, J. Agusti, R. Blesa, Human neoteny revisited: The case of synaptic plasticity. *Am. J. Hum. Biol.* **23**,  
1171 729-739 (2011).
- 1172 54. R. Safi *et al.*, The axolotl (*Ambystoma mexicanum*), a neotenic amphibian, expresses functional thyroid hormone  
1173 receptors. *Endocrinology*. **145**, 760-772 (2004).
- 1174 55. Y. Voituron, M. de Fraipont, J. Issartel, O. Guillaume, J. Clobert, Extreme lifespan of the human fish (*Proteus*  
1175 *anguinus*): a challenge for ageing mechanisms. *Biol. Lett.* **7**, 105-107 (2011).
- 1176 56. G. Bavestrello, Christian Sommer, Michele Sarà, Bi-directional conversion in *Turritopsis nutricula* (Hydrozoa).  
1177 *Scientia Marina*. **56**, 137-140 (1992).

- 1178 57. R. Buffenstein, Negligible senescence in the longest living rodent, the naked mole-rat: insights from a  
1179 successfully aging species. *J. Comp. Physiol. B.* **178**, 439-445 (2008).
- 1180 58. A. Foudi *et al.*, Analysis of histone 2B-GFP retention reveals slowly cycling hematopoietic stem cells. *Nat.*  
1181 *Biotechnol.* **27**, 84-90 (2009).
- 1182 59. F. Zink *et al.*, Clonal hematopoiesis, with and without candidate driver mutations, is common in the elderly.  
1183 *Blood.* **130**, 742-752 (2017).
- 1184 60. A. Sanjuan-Pla *et al.*, Platelet-biased stem cells reside at the apex of the haematopoietic stem-cell hierarchy.  
1185 *Nature.* **502**, 232-236 (2013).
- 1186 61. Z. Ke, A. Vaidya, J. Ascher, A. Seluanov, V. Gorbunova, Novel husbandry techniques support survival of naked  
1187 mole rat (*Heterocephalus glaber*) pups. *J. Am. Assoc. Lab. Anim. Sci.* **53**, 89-91 (2014).
- 1188 62. J. P. Greer *et al.*, *Wintrobe's Clinical Hematology* (Lippincott Williams & Wilkins (LWW), , ed. 14th, 2019).
- 1189 63. E. E. Osgood, A. J. Seaman, The cellular composition of normal bone marrow as obtained by sternal puncture.  
1190 *Physiological Reviews.* **24**, 46-69 (1944).
- 1191 64. P. Genovese *et al.*, Targeted genome editing in human repopulating haematopoietic stem cells. *Nature.* **510**, 235-  
1192 240 (2014).
- 1193 65. A. C. Wilkinson, R. Ishida, H. Nakauchi, S. Yamazaki, Long-term ex vivo expansion of mouse hematopoietic  
1194 stem cells. *Nat. Protoc.* **15**, 628-648 (2020).
- 1195 66. X. Zhou *et al.*, Beaver and Naked Mole Rat Genomes Reveal Common Paths to Longevity. *Cell. Rep.* **32**, 107949  
1196 (2020).
- 1197 67. B. Li, C. N. Dewey, RSEM: accurate transcript quantification from RNA-Seq data with or without a reference  
1198 genome. *BMC Bioinformatics.* **12**, 323-323 (2011).
- 1199 68. R. C. Gentleman *et al.*, Bioconductor: open software development for computational biology and bioinformatics.  
1200 *Genome Biol.* **5**, R80-r80. Epub 2004 Sep 15 (2004).
- 1201 69. A. Schwarzer *et al.*, The non-coding RNA landscape of human hematopoiesis and leukemia. *Nat. Commun.* **8**,  
1202 218-4 (2017).
- 1203 70. A. A. Sergushichev, An algorithm for fast preranked gene set enrichment analysis using cumulative statistic  
1204 calculation. *bioRxiv.*, 060012 (2016).
- 1205 71. S. B. Plaisier, R. Taschereau, J. A. Wong, T. G. Graeber, Rank-rank hypergeometric overlap: identification of  
1206 statistically significant overlap between gene-expression signatures. *Nucleic Acids Res.* **38**, e169 (2010).
- 1207 72. P. Roelli, bbimber, B. Flynn, santiagorevale, G. Gui, Hoohm/CITE-seq-Count: 1.4.2. DOI  
1208 **10.5281/zenodo.2590196**(2019).
- 1209 73. J. S. Dahlin *et al.*, A single-cell hematopoietic landscape resolves 8 lineage trajectories and defects in Kit mutant  
1210 mice. *Blood.* **131**, e1-e11 (2018).
- 1211 74. J. M. Bernitz *et al.*, Memory of Divisional History Directs the Continuous Process of Primitive Hematopoietic  
1212 Lineage Commitment. *Stem Cell. Reports.* **14**, 561-574 (2020).
- 1213 75. K. Behrens *et al.*, Runx1 downregulates stem cell and megakaryocytic transcription programs that support niche  
1214 interactions. *Blood.* **127**, 3369-3381 (2016).

- 1215 76. Y. Dong *et al.*, Synergy of NUP98-HOXA10 Fusion Gene and NrasG12D Mutation Preserves the Stemness of  
1216 Hematopoietic Stem Cells on Culture Condition. *Cells*. **8**, 10.3390/cells8090951 (2019).
- 1217 77. J. George *et al.*, Leukaemia cell of origin identified by chromatin landscape of bulk tumour cells. *Nat. Commun.*  
1218 **7**, 12166 (2016).
- 1219 78. L. Han *et al.*, Chromatin remodeling mediated by ARID1A is indispensable for normal hematopoiesis in mice.  
1220 *Leukemia*. **33**, 2291-2305 (2019).
- 1221 79. T. C. Luis *et al.*, Initial seeding of the embryonic thymus by immune-restricted lympho-myeloid progenitors. *Nat.*  
1222 *Immunol.* **17**, 1424-1435 (2016).
- 1223 80. D. Sun *et al.*, Epigenomic profiling of young and aged HSCs reveals concerted changes during aging that  
1224 reinforce self-renewal. *Cell. Stem Cell*. **14**, 673-688 (2014).
- 1225 81. S. Amon *et al.*, Sensitive Quantitative Proteomics of Human Hematopoietic Stem and Progenitor Cells by Data-  
1226 independent Acquisition Mass Spectrometry. *Mol. Cell. Proteomics*. **18**, 1454-1467 (2019).
- 1227 82. L. Chen *et al.*, Transcriptional diversity during lineage commitment of human blood progenitors. *Science*. **345**,  
1228 1251033 (2014).
- 1229 83. M. R. Corces *et al.*, Lineage-specific and single-cell chromatin accessibility charts human hematopoiesis and  
1230 leukemia evolution. *Nat. Genet.* **48**, 1193-1203 (2016).
- 1231 84. R. Drissen, S. Thongjuea, K. Theilgaard-Monch, C. Nerlov, Identification of two distinct pathways of human  
1232 myelopoiesis. *Sci. Immunol.* **4**, 10.1126/sciimmunol.aau7148 (2019).
- 1233 85. C. Baccin *et al.*, Combined single-cell and spatial transcriptomics reveal the molecular, cellular and spatial bone  
1234 marrow niche organization. *Nat. Cell Biol.* **22**, 38-48 (2020).
- 1235 86. A. T. L. Lun, A. C. Richard, J. C. Marioni, Testing for differential abundance in mass cytometry data. *Nat.*  
1236 *Methods*. **14**, 707-709 (2017).
- 1237 87. Y. Hao *et al.*, Integrated analysis of multimodal single-cell data. *bioRxiv.*, 2020.10.12.335331 (2020).
- 1238 88. C. M. Baum, I. L. Weissman, A. S. Tsukamoto, A. M. Buckle, B. Peault, Isolation of a candidate human  
1239 hematopoietic stem-cell population. *Proc. Natl. Acad. Sci. U. S. A.* **89**, 2804-2808 (1992).
- 1240 89. Y. Morita *et al.*, Functional characterization of hematopoietic stem cells in the spleen. *Exp. Hematol.* **39**, 351-  
1241 359.e3 (2011).
- 1242

1243 **Acknowledgments:** The authors thank Alex Aiezza II for RSEM builds of mouse  
1244 samples, Anthony Corbett for FRAMA, Jason R Myers for a Perl FRAMA-into-RSEM  
1245 interface, Cameron Baker for cellranger preprocessing of scRNA-Seq data, Michelle  
1246 Zanche, Jeffrey Malik and John Ashton for Genomic Research Core support.

1247 **Funding:** This work was supported by the US National Institutes of Health grants to V.G.  
1248 and A.S. and V.N.G. S.E. is a fellow of HFSP.

1249 **Author contributions:** S.E. designed and supervised research, performed most  
1250 experiments and analyzed data; A.T. wrote scripts for single-cell fGSEA and contributed  
1251 to bioinformatics analyses and FACS; F.T.Z. performed histology quantifications, animal  
1252 perfusions and data analysis; X.Z. improved genome assembly; M.M. performed  
1253 FRAMA-genome alignments; M.E.S. performed histology and most histochemistry  
1254 stainings; Q.Z. mapped TCR genes; Z.Z. performed mouse blood analysis; M.D.G.  
1255 performed histology and provided human BM specimen; S.G., E.M.I., Z.K., M.T., J.H.K,  
1256 Z.Z. and V.N.G. contributed to data analysis; A.S. and V.G. supervised research; S.E.,  
1257 A.S. and V.G. wrote the manuscript with input from all authors.

1258 **Competing interests:** Authors declare that they have no competing interests.

1259 **Data and materials availability:** The RNA-Sequencing data that support the findings of  
1260 this study are available in figshare.com with the identifiers

1261 [10.6084/m9.figshare.c.5472735](https://figshare.com/10.6084/m9.figshare.c.5472735), [10.6084/m9.figshare.c.5470587](https://figshare.com/10.6084/m9.figshare.c.5470587),  
1262 [10.6084/m9.figshare.c.5472684](https://figshare.com/10.6084/m9.figshare.c.5472684), [10.6084/m9.figshare.c.5474256](https://figshare.com/10.6084/m9.figshare.c.5474256). The custom code to run  
1263 GSEA for scRNA-Seq clusters for cell type annotation was deposited in GitHub under  
1264 <https://github.com/alex-trapp/sc-fgsea>.



1265 **Figures and Tables**

Figure 1

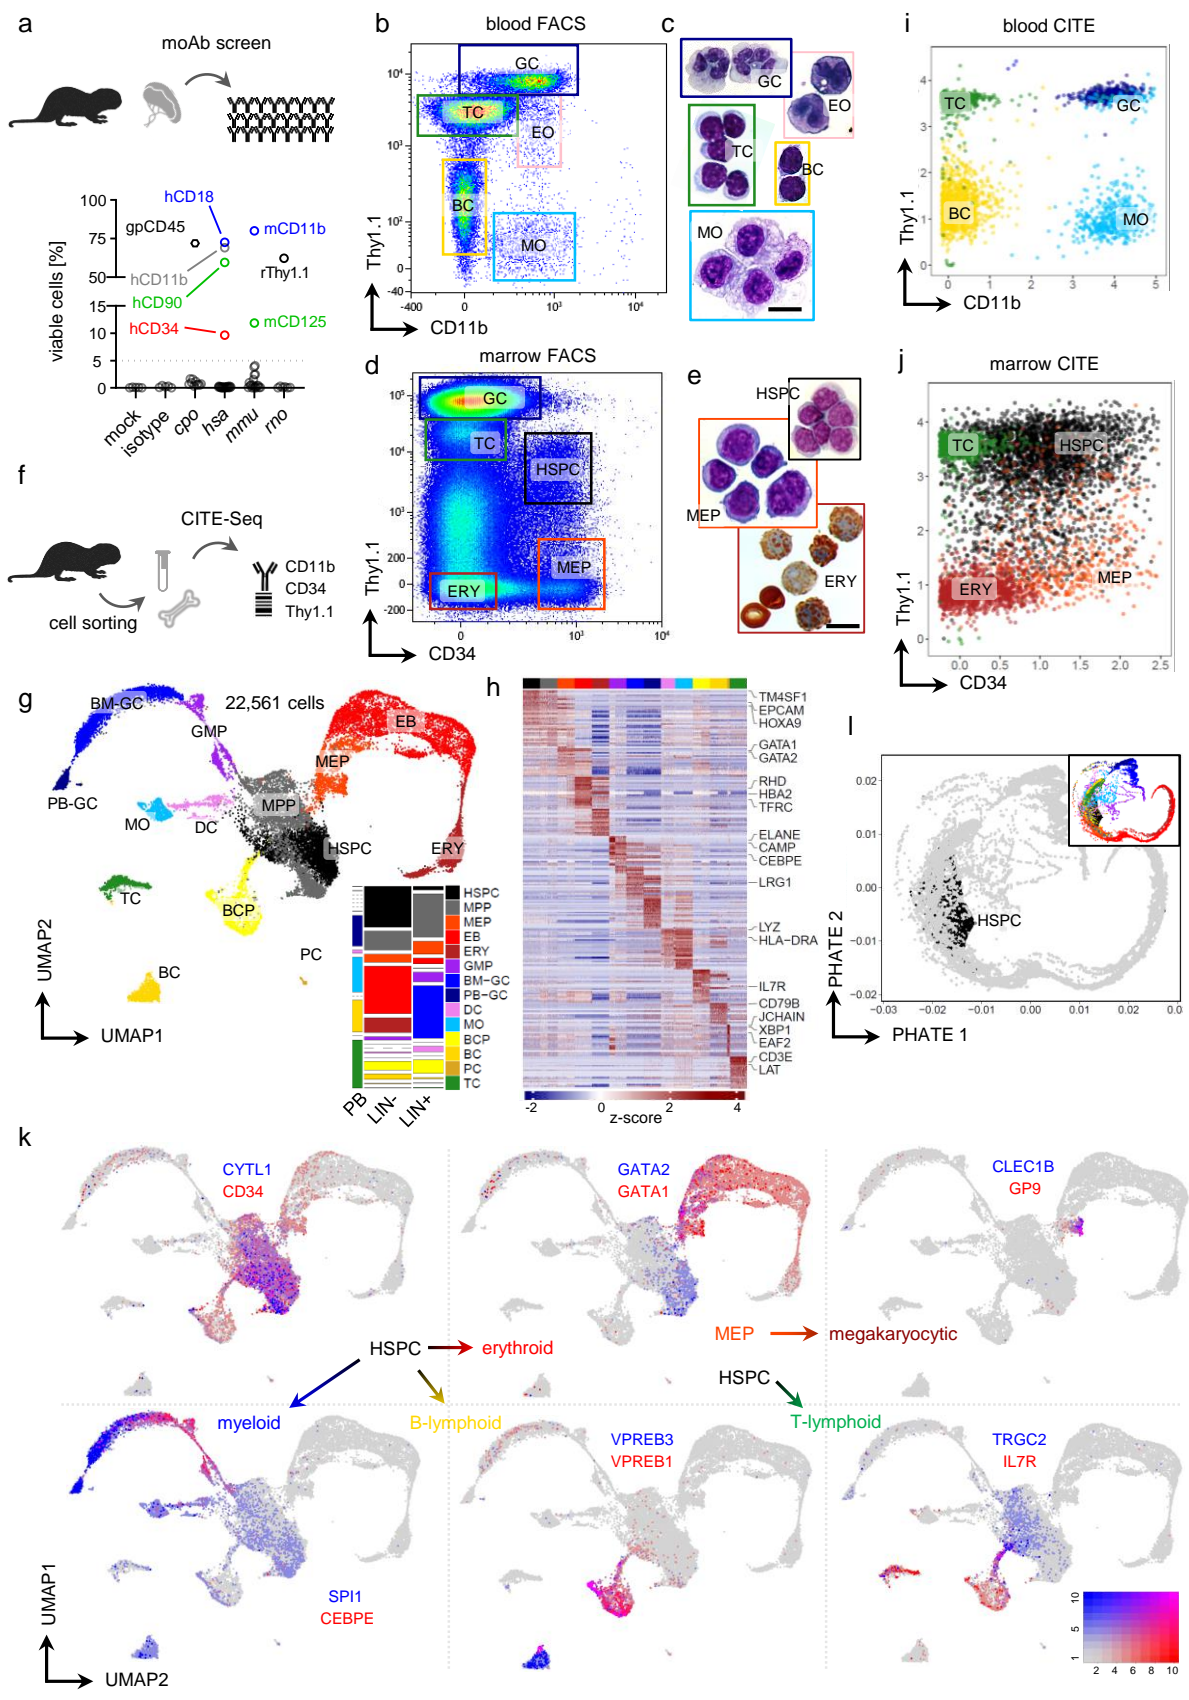

1266 **Fig. 1. Purification of blood cell types and the developmental hierarchy in the marrow.**  
1267 **a**, Frequency of naked mole-rat bone marrow cells stained with cross-reactive antibodies (n=101);  
1268 mock, unstained; *cpo*, guinea pig target host; *hsa*, human; *mmu*, mouse; *rno*, rat. Dotted line, 5%  
1269 threshold unspecific binding. Representative FACS gating of **b**, blood (PB) stained with Thy1.1  
1270 and CD11b or **d**, marrow (BM) stained with Thy1.1 and CD34. Sorting gates: GC, neutrophil  
1271 granulocytes; BC, B cells; TC, T cells; MO, monocytes; EO, eosinophils; HSPC, hematopoietic  
1272 stem and progenitor cells; MEP, megakaryocytic erythroid progenitor; ERY, erythroid cells. May-  
1273 Grünwald-Giemsa staining of sorted **c**, PB or **e**, BM cells; Scale bar 20 $\mu$ m, same magnification  
1274 for each micrograph. **f**, Sorted PB (n=1) and BM (n=3) were used for CITE-Seq (G-L) with  
1275 antibodies from (B-E). **g**, UMAP of Louvain-clustered single-cell transcriptomes, color legend is  
1276 used throughout this dataset; 1799 differentially expressed genes were used for fGSEA-based cell  
1277 type annotation. Tile-stack inset reflects relative cluster frequencies [y] and tissue library fractions  
1278 of the dataset [x] as probability. MPP, multipotent progenitor; EB, erythroblast; GMP,  
1279 granulocytic monocytic progenitor; BM-GC, marrow neutrophils; PB-GC, blood neutrophils; DC,  
1280 dendritic cells; BCP, B cell progenitor; PC, plasma cells. **h**, Heatmap showing top 25  
1281 overexpressed genes by fold-change of 14 single-cell clusters from sorted BM and PB randomly  
1282 downsampled to  $\leq 500$  cells, curated cell type markers are labelled. Scaled CITE-UMI counts per  
1283 cell as **i**, Thy1.1 vs CD11b for PB and **j**, Thy1.1 vs CD34 for BM. **k**, UMAP-based Blendplots  
1284 showing pairs of differentially expressed lineage markers conserved across species; gene1 (red,  
1285 high expression), gene2 (blue, high expression) and co-expressing cells (purple). See scale on the  
1286 right; expression, scaled UMI counts. **l**, PHATE model of single-cell transcriptomes, HSPC  
1287 cluster is highlighted in black; inset depicts model colored by annotation from **g**, showing position  
1288 of progeny cell types relative to HSPCs.  
1289  
1290

Figure 2

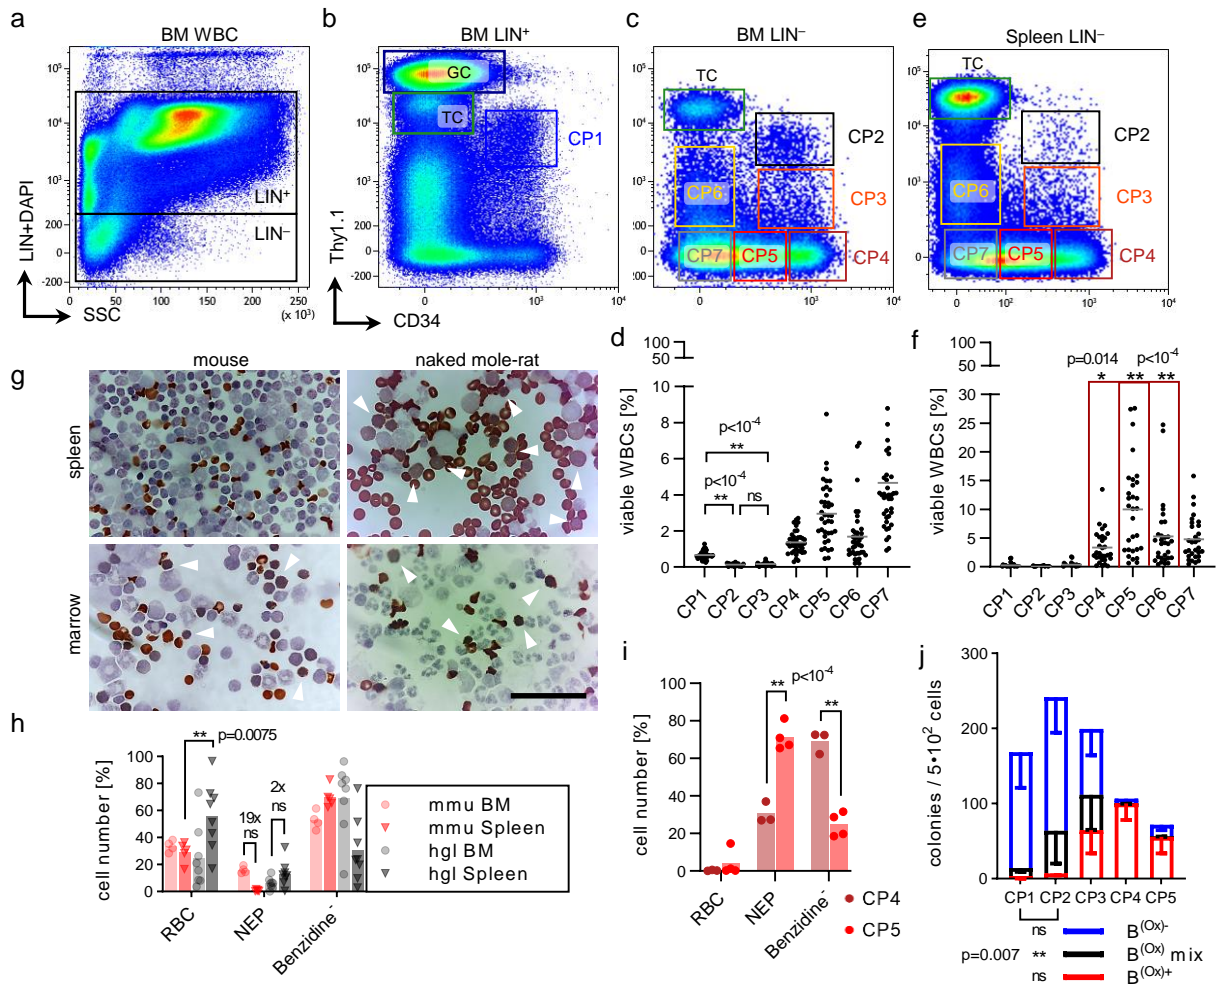

1291 **Fig. 2. Normal erythropoiesis predominantly occurs in the spleen.**  
1292 Sorting strategy for the HSPC compartment with **a**, lineage (LIN = CD11b/CD18/CD90/CD125)  
1293 depletion, **b**, gating of LIN<sup>+</sup> CP1 and **c**, gating of LIN<sup>-</sup> CP2-7. **d**, Frequencies of BM CP cell  
1294 fractions. p-value determined by Brown-Forsythe's One-way ANOVA; n=39; animal age range 1-  
1295 4yr. **e**, Representative gating of LIN<sup>-</sup> CP2-7 in spleen. **f**, Frequencies of spleen CP cell fractions;  
1296 n=30. p-value determined by Sidak's Two-way ANOVA comparing BM vs spleen. **g**, Benzidine  
1297 staining of whole spleen [top] or marrow [bottom] from 3 month old mice [left] or 3 year old  
1298 naked mole-rats [right]. Scale bar 250µm, arrows indicate nucleated erythroid progenitors  
1299 (NEPs). **h**, Relative counts of Benzidine-stained cytopins from whole spleen or WBM. p-value  
1300 determined by Sidak's Two-way ANOVA comparing BM vs spleen between mouse (n=5) and  
1301 naked mole-rat (n=8). **i**, Relative counts of Benzidine-stained cytopins from naked mole-rat  
1302 sorted spleen fractions. p-value determined by Sidak's Two-way ANOVA comparing BM vs  
1303 spleen; n=4. **j**, Benzidine-stained colony assays from sorted BM cells, n=3. Error bars denote s.d.,  
1304 p-value determined by Sidak's Two-way ANOVA.

Figure 3

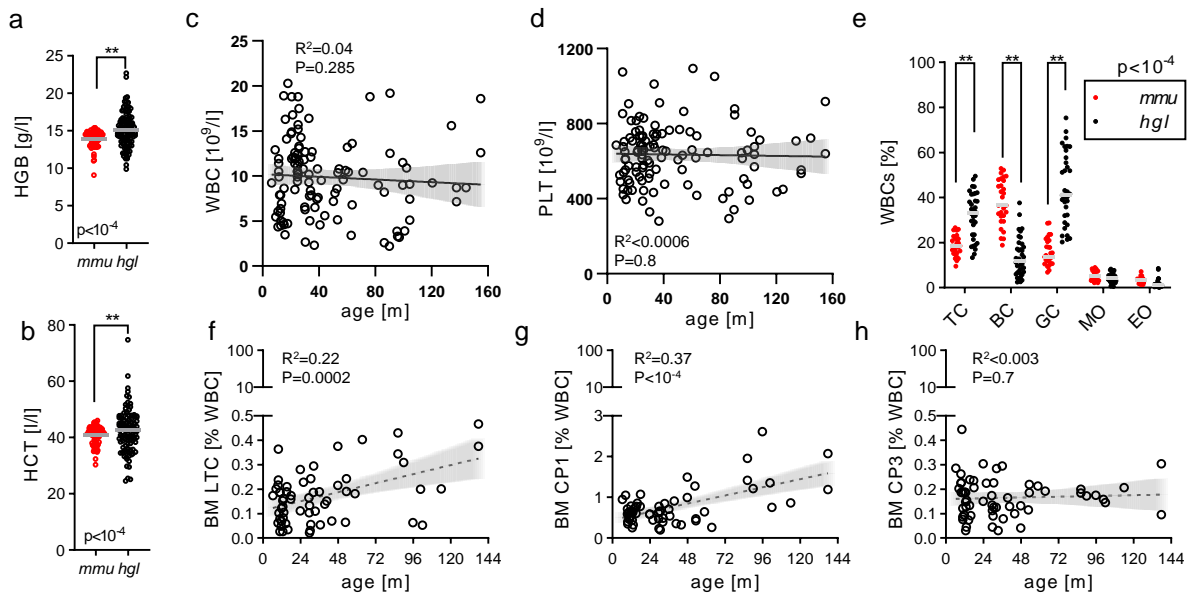

1305 **Fig. 3. Youthful blood cell composition into midlife in naked mole-rats.**  
1306 **a**, Hemoglobin concentration and **b**, hematocrit levels between mouse [*mmu*] and naked mole-rat  
1307 [*hgl*] blood. p-values were determined by unpaired Welch's t-test; n(*mmu*)=83, n(*hgl*)=104. **c**,  
1308 Volumetric white blood cell (WBC) and **d**, platelet (PLT) numbers across animal age.  $R^2$ ,  
1309 coefficient of determination; p-values were determined by conventional linear regression fitting  
1310 both slope and intercept; n=112. **e**, FACS WBC frequencies; p-value determined by Sidak's Two-  
1311 way ANOVA comparing mouse *mmu* (n=29) vs *hgl* (n=34). BM cell frequencies of **f**, LTC/CP2,  
1312 **g**, CP1 or **h**, CP3 across age; n=60, linear regression with 95% CI as trend line; p<0.05,  
1313 significance.

Figure 4

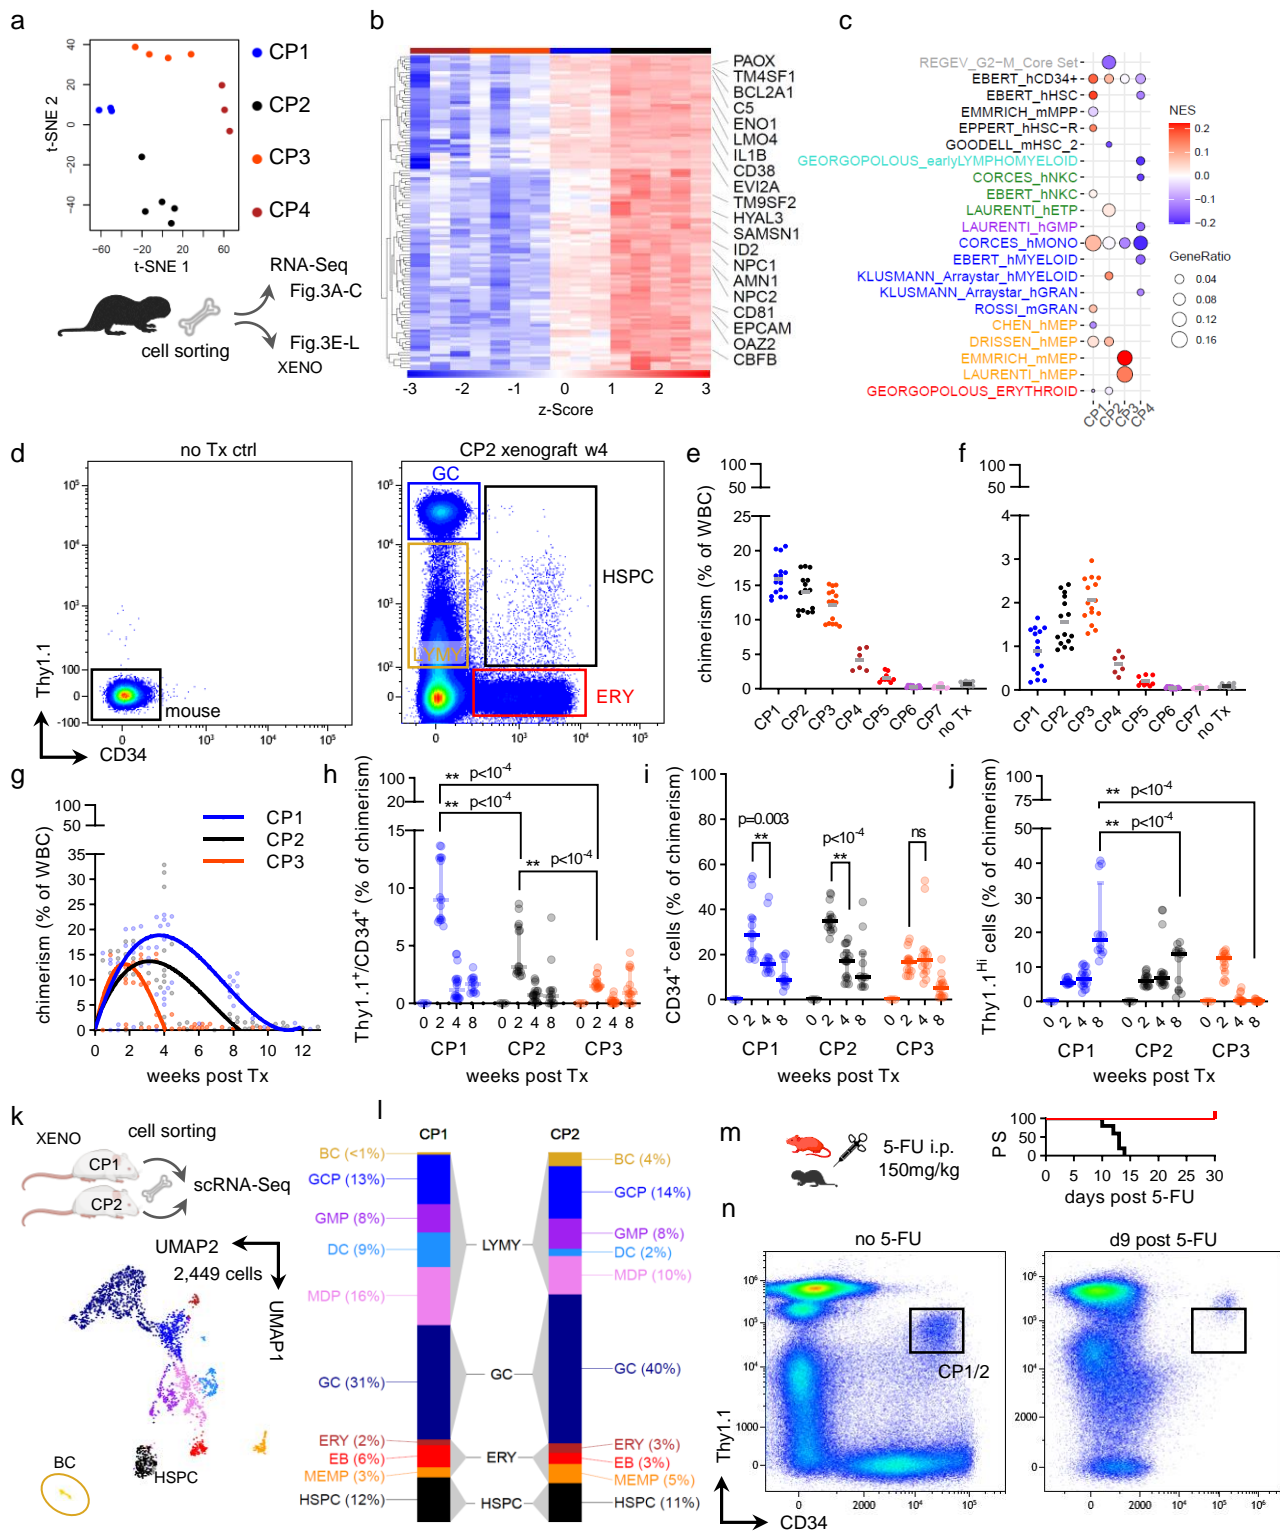



1314 **Fig. 4. LTCs define the primitive HSPC compartment.**  
1315 **a**, BM from 1-3 year old naked mole-rats sorted into indicated cell populations for RNA-  
1316 Sequencing or xenotransplantations, color legend applied throughout the Figure. Unsupervised t-  
1317 SNE clustering, effectively separating each CP group; vst-transformed counts as input. **b**, 116  
1318 gradually downregulated genes from CP2 to CP1, displayed are 20 genes with known roles in  
1319 hematopoiesis. **c**, GSEA of sorted BM fractions displaying top 10 q-value terms from a geneset  
1320 collection of human and mouse HSPCs. NES, normalized enrichment score; GeneRatio,  
1321  $(\text{signature} \cap \text{term}) / (\text{signature} \cap \text{all terms})$ . **d**, Gating strategy to quantify total engraftment;  
1322 untransplanted recipient [left] vs CP2 xenograft 4 weeks post Tx [right]; HSPC, Thy1.1<sup>int</sup>/CD34<sup>+</sup>  
1323 stem and progenitors; ERY, CD34<sup>+</sup> erythroid cells; GC, Thy1.1<sup>hi</sup> granulocytes; LYMY,  
1324 Thy1.1<sup>lo/int</sup>/CD34<sup>-</sup> lymphomyeloid cells. Recipient chimerism 2 weeks post Tx in **e**, BM or **f**,  
1325 spleen; total recipients from 3 donors for each CP graft. **g**, BM chimerism over time; recipients  
1326 from 5 donors for weeks 4, 8 and 12. P-value determined by Fisher's Two-way ANOVA; curve-  
1327 fitting by cubic polynomial. Kinetics of engraftment proportions for **h**, HSPC, **i**, ERY and **j**, GC;  
1328 p-value determined by Tukey's Two-way ANOVA. **k**, ScRNA-Seq of week 4 BM CP1 and CP2  
1329 xenografts (n=1); HSPC and BC clusters are outlined in CP1/2-integrated dataset filtered for  
1330 naked mole-rat cells. **l**, Quantification of GSEA-annotated cell types between grafts. **m**, 5-FU  
1331 administration into 6 month-old mice (n=4, bodyweight 25±2g) or 2-3 year-old naked mole-rats  
1332 (n=5, bodyweight 29±4g); i.p., intraperitoneal. **n**, Naked mole-rat BM untreated or treated with 5-  
1333 FU (n=5), no LIN gating.

**Figure 5**

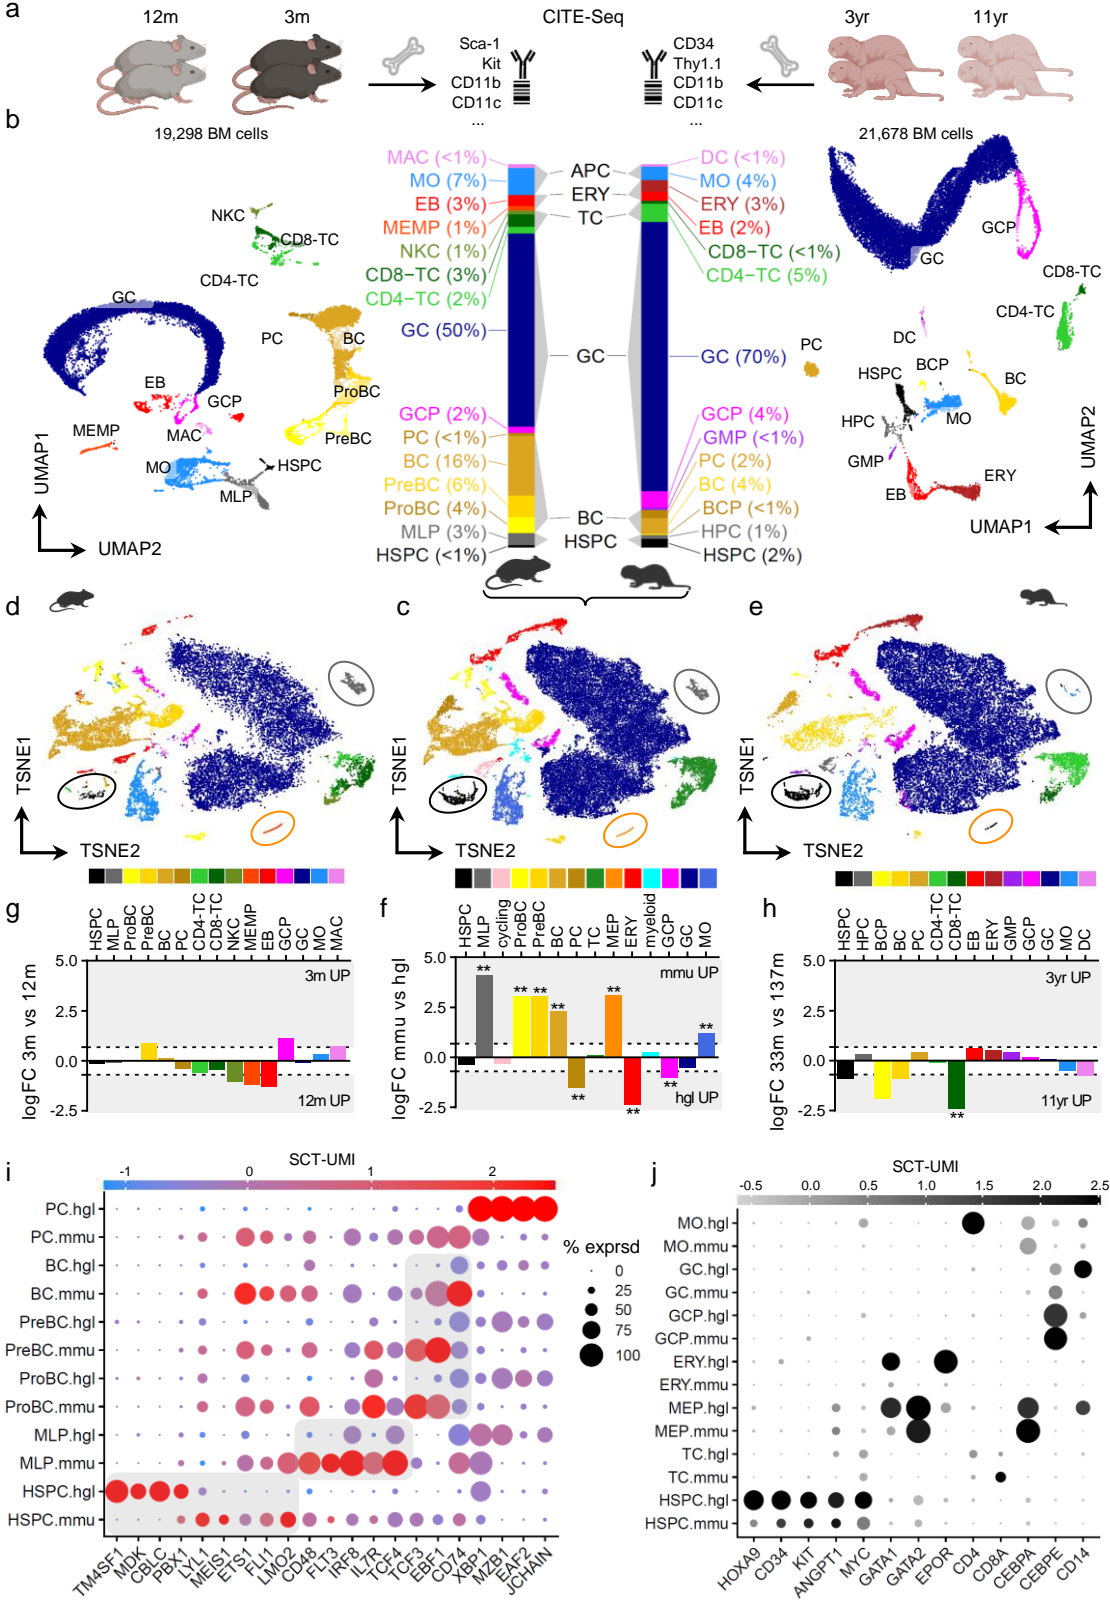

1334 **Fig. 5. BM CITE-Seq across species.**  
1335 **a**, Unfractionated BM of perfused mice (n=4) or naked mole-rats (n=4) were subjected to CITE-  
1336 Seq. *mmu* CITE-moAbs: Sca-1, Kit, Cd11b, Cd11c, Nk-1.1, Cd4, Cd8a, Cd3e, Cd19, Cd25,  
1337 Cd44, Gr-1, Ter119; *hgl*: Thy1.1, CD34, Cd11b, Cd11c, Nk-1.1, Gr-1, CD90. **b**, UMAP of the  
1338 CCA-integrated mouse [left] or naked mole-rat [right] dataset with fGSEA-annotated cell types.  
1339 MEMP, megakaryocytic erythroid mast cell progenitor; GCP, granulocytic precursor; HPC,  
1340 hematopoietic progenitor cell. Bar chart [center] displaying average cluster frequencies across  
1341 species; APC, antigen-presenting cell. **c**, T-SNE of SCTransform-integrated *mmu* and *hgl* BM,  
1342 colorbar legend for species-integrated clusters below. Encircled coordinates for HSPC, LMPP and  
1343 MEP clusters; cycling, co-clustered based on active cell cycle gene expression. T-SNE from  
1344 species-integration for **d**, mouse or **e**, naked mole-rat partition; Cluster annotation and coloring  
1345 from the single-species analysis in **b**. **f**, Differential cell type abundance across species; dotted  
1346 lines, 2-fold change. MLP,  $p < 10^{-10}$ ; ProBC, PreBC, MEP,  $p < 10^{-7}$ ; BC, ERY,  $p < 10^{-5}$ ; PC,  
1347  $p = 0.0017$ ; MO,  $p = 0.0088$ ; GCP,  $p = 0.027$ . Differential cell type abundance across age for **g**,  
1348 mouse or **h**, naked mole-rat single-species analysis. *hgl* CD8-TC,  $p = 0.002$ ; *hgl* BCP,  $p = 0.013$ .  
1349 Dotted lines, 2-fold-change. Cross-species expression of selected **i**, differentially regulated or **j**,  
1350 conserved markers between cell types. SCT-UMI, sctransform-scaled UMI counts; % exprsd,  
1351 percentage of cells/cluster with UMI  $\geq 1$ .

# Figure 6

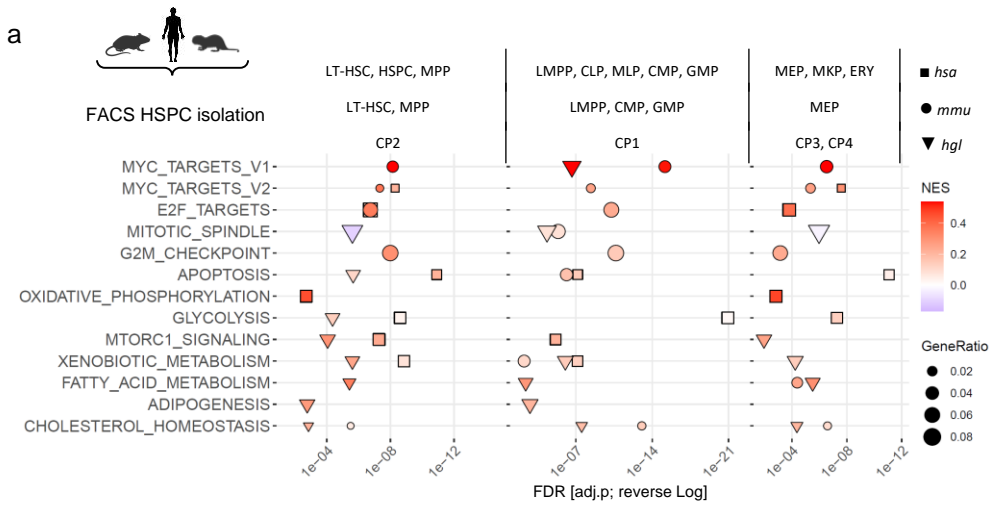

**b** Seahorse Mito-Stress

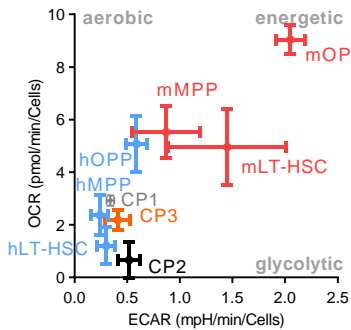

**c**

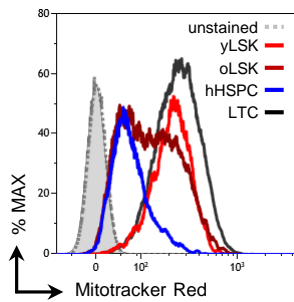

**d**

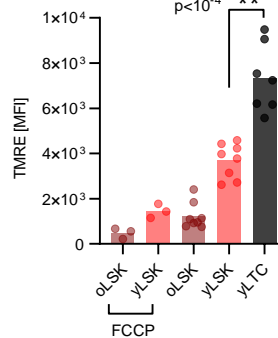

1352 **Fig. 6. Low metabolism of naked mole-rat HSPCs.**  
1353 **a**, Cross-species integration of bulk RNA-Seq datasets. Naked mole-rat BM populations CP1-4  
1354 were matched to human and murine counterparts for GSEA with MSigDB hallmark genesets.  
1355 Primitive stem and progenitor [left], *hsa*: LT-HSC, LIN<sup>-</sup>/CD34<sup>+</sup>/CD38<sup>lo</sup>/CD90<sup>+</sup>/CD45RA<sup>-</sup> (n=7);  
1356 HSPC, LIN<sup>-</sup>/CD34<sup>+</sup>/CD38<sup>lo</sup> (n=11); MPP, LIN<sup>-</sup>/CD34<sup>+</sup>/CD38<sup>lo</sup>/CD90<sup>-</sup>/CD45RA<sup>-</sup> (n=4); *mmu*:  
1357 LT-HSC, LIN<sup>-</sup>/Sca-1<sup>+</sup>/Kit<sup>+</sup>/CD150<sup>+</sup>/CD48<sup>-</sup> (n=25); MPP, LIN<sup>-</sup>/Sca-1<sup>+</sup>/Kit<sup>+</sup>/CD150<sup>-</sup>/CD48<sup>+</sup>  
1358 (n=6); *hgl*: CP2, LIN<sup>-</sup>/Thy1.1<sup>int</sup>/CD34<sup>+</sup> (n=5). Lymphomyeloid [center], *hsa*: LMPP, LIN<sup>-</sup>  
1359 /CD34<sup>+</sup>/CD38<sup>lo</sup>/CD123<sup>lo</sup>/CD45RA<sup>+</sup> (n=9); CLP, LIN<sup>-</sup>/CD34<sup>+</sup>/CD38<sup>hi</sup>/CD10<sup>+</sup>/CD45RA<sup>+</sup> (n=6);  
1360 MLP, LIN<sup>-</sup>/CD34<sup>+</sup>/CD38<sup>lo</sup>/CD90<sup>-</sup>/CD45RA<sup>+</sup>/CD71<sup>-</sup> (n=4); CMP, LIN<sup>-</sup>  
1361 /CD34<sup>+</sup>/CD38<sup>hi</sup>/CD123<sup>lo</sup>/CD45RA<sup>-</sup> (n=26); GMP, LIN<sup>-</sup>/CD34<sup>+</sup>/CD38<sup>lo</sup>/CD123<sup>lo</sup>/CD45RA<sup>+</sup>  
1362 (n=18); *mmu*: LMPP, LIN<sup>-</sup>/Sca-1<sup>+</sup>/Kit<sup>+</sup>/Flt3<sup>hi</sup> (n=5); CMP, LIN<sup>-</sup>/Sca-1<sup>-</sup>/Kit<sup>+</sup>/CD16/32<sup>lo</sup>/CD34<sup>+</sup>  
1363 (n=8); GMP, LIN<sup>-</sup>/Sca-1<sup>-</sup>/Kit<sup>+</sup>/CD16/32<sup>hi</sup>/CD34<sup>+</sup> (n=16); *hgl*: CP1, LIN<sup>+</sup>/Thy1.1<sup>int</sup>/CD34<sup>+</sup> (n=5).  
1364 Erythroid [right], *hsa*: MEP, LIN<sup>-</sup>/CD34<sup>+</sup>/CD38<sup>hi</sup>/CD123<sup>-</sup>/CD45RA<sup>-</sup> (n=23); MKP, LIN<sup>-</sup>  
1365 /CD41a<sup>+</sup>/CD42b<sup>+</sup> (n=3); ERY, LIN<sup>-</sup>/CD34<sup>lo/-</sup>/CD36<sup>+</sup>/GYPA<sup>+</sup>/CD71<sup>+</sup> (n=12); *mmu*: MEP, LIN<sup>-</sup>  
1366 /Sca-1<sup>-</sup>/Kit<sup>+</sup>/CD16/32<sup>-</sup>/CD34<sup>-</sup> (n=15); *hgl*: CP3, LIN<sup>-</sup>/Thy1.1<sup>lo</sup>/CD34<sup>+</sup> (n=5); CP4, LIN<sup>-</sup>/Thy1.1<sup>-</sup>  
1367 /CD34<sup>+</sup> (n=5). Within each group, cell types were pooled for each species. Shown are pathways  
1368 related to proliferation and metabolism, full results see Table S6. NES, normalized enrichment  
1369 score; GeneRatio, (signature  $\cap$  term) / (signature  $\cap$  all terms); FDR, false discovery rate. **b**,  
1370 Seahorse assay with cell types sorted according to (A); hOPP, human oligopotent progenitors  
1371 LIN<sup>-</sup>/CD34<sup>+</sup>/CD38<sup>+</sup>; mOPP, LIN<sup>-</sup>/Sca-1<sup>-</sup>/Kit<sup>+</sup>. ECAR, extracellular acidification rate; OCR,  
1372 oxygen consumption rate. Human cell types, n=4; mouse, n=3, naked mole-rat, n=3. **c**,  
1373 Mitotracker Red staining in mouse (n=4), human (n=4) and naked mole-rat (n=5) BM, histogram  
1374 of merged per-species data. unstained, BM from mouse [solid], human [dotted] or NMR [AUC];  
1375 yLSK, LIN<sup>-</sup>/Sca-1<sup>+</sup>/Kit<sup>+</sup>, 3 month old; oLSK, 24 month; yLTC, LIN<sup>-</sup>/Thy1.1<sup>int</sup>/CD34<sup>+</sup>, 3 year  
1376 old; hHSC, human CD34<sup>+</sup>/CD38<sup>lo</sup>; quantitation see Fig. S8h. **d**, Mean fluorescence intensities of  
1377 TMRE stainings. p-values were determined by Tukey's One-way ANOVA; LSK, n=8; LTC, n=7.  
1378 FCCP, negative control.

1379

Figure 7

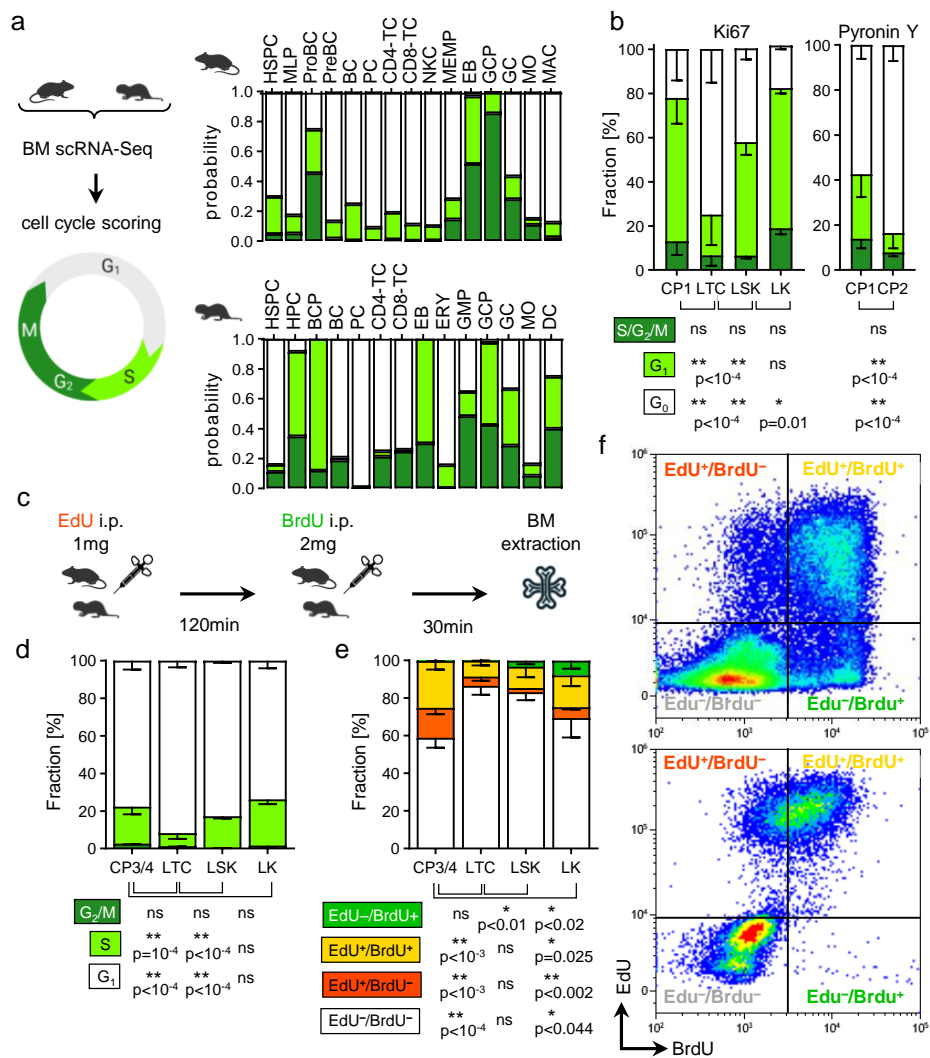

1380 **Fig. 7. Slow cell growth of naked mole-rat HSPCs.**  
1381 **a**, Cell cycle scoring of mouse [top] and naked mole-rat [bottom] whole BM scRNA-Seq. **b**, Cell  
1382 cycle staining with Ki67 [left] (CP1/LTC, n=12); young mouse BM (n=4) was used for LK and  
1383 LSK. p-value determined by Tukey's Two-way ANOVA. Note that CP1 cells do not differ in any  
1384 cell cycle stage from LKs. Cell cycle staining with Pyronin Y [right] (N=6); p-value determined  
1385 by Sidak's Two-way ANOVA. **c**, Dual-Pulse labelling *in vivo* with 3-4m old mice (n=7) or 2-3yr  
1386 old naked mole-rats (n=5). EdU, 5-ethynyl-2'-deoxyuridine; BrdU, 5-bromo-2'-deoxyuridine. **d**,  
1387 Cell cycle analysis of BM populations by EdU vs DNA-content. LK, LIN<sup>-</sup>/Sca-1<sup>-</sup>/Kit<sup>+</sup>; CP3/4,  
1388 LIN<sup>-</sup>/Thy1.1<sup>lo/-</sup>/CD34<sup>+</sup>; p-values obtained from Tukey's Two-way ANOVA. **e**, Dual-Pulse  
1389 analysis of BM populations by EdU vs BrdU. P-values obtained from Tukey's Two-way  
1390 ANOVA. **f**, Representative quantitation of merged per-species Dual-Pulse measurements for  
1391 mouse LK [top] and naked mole-rat CP3/4 [bottom].

Figure 8

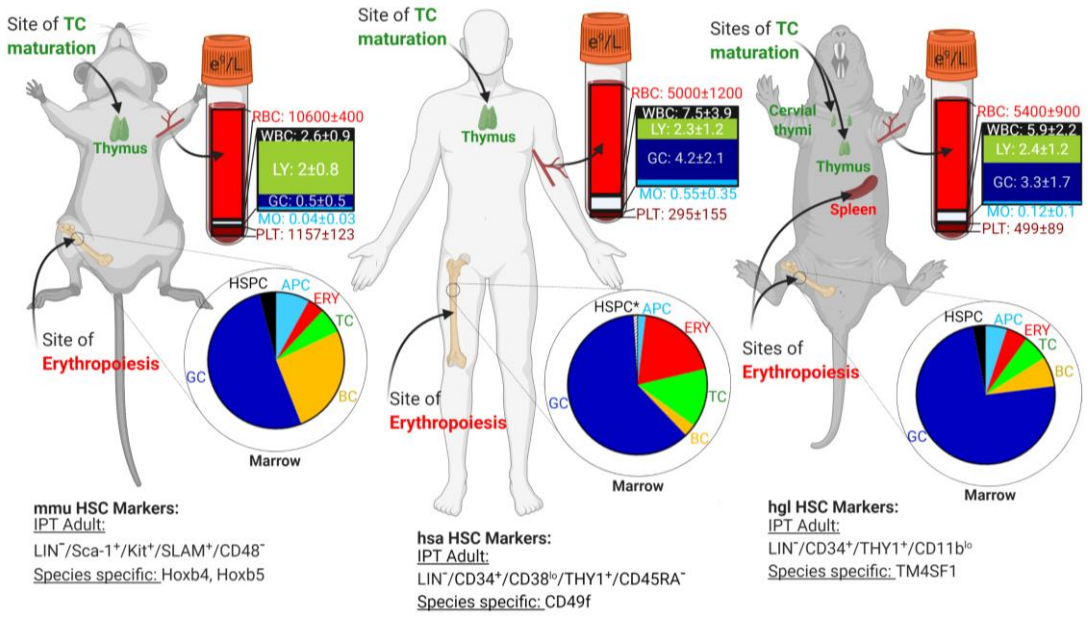



1392 **Fig. 8. Interspecies differences and similarities in blood and marrow composition.**  
1393 Quick reference including blood and marrow compositions, sites of TC maturation (*11*) and  
1394 erythropoiesis, and HSC markers. Cell type proportion in bone marrow of mouse and NMR based  
1395 on Fig 5b.

1396 **Supplementary Materials**

Fig. S1

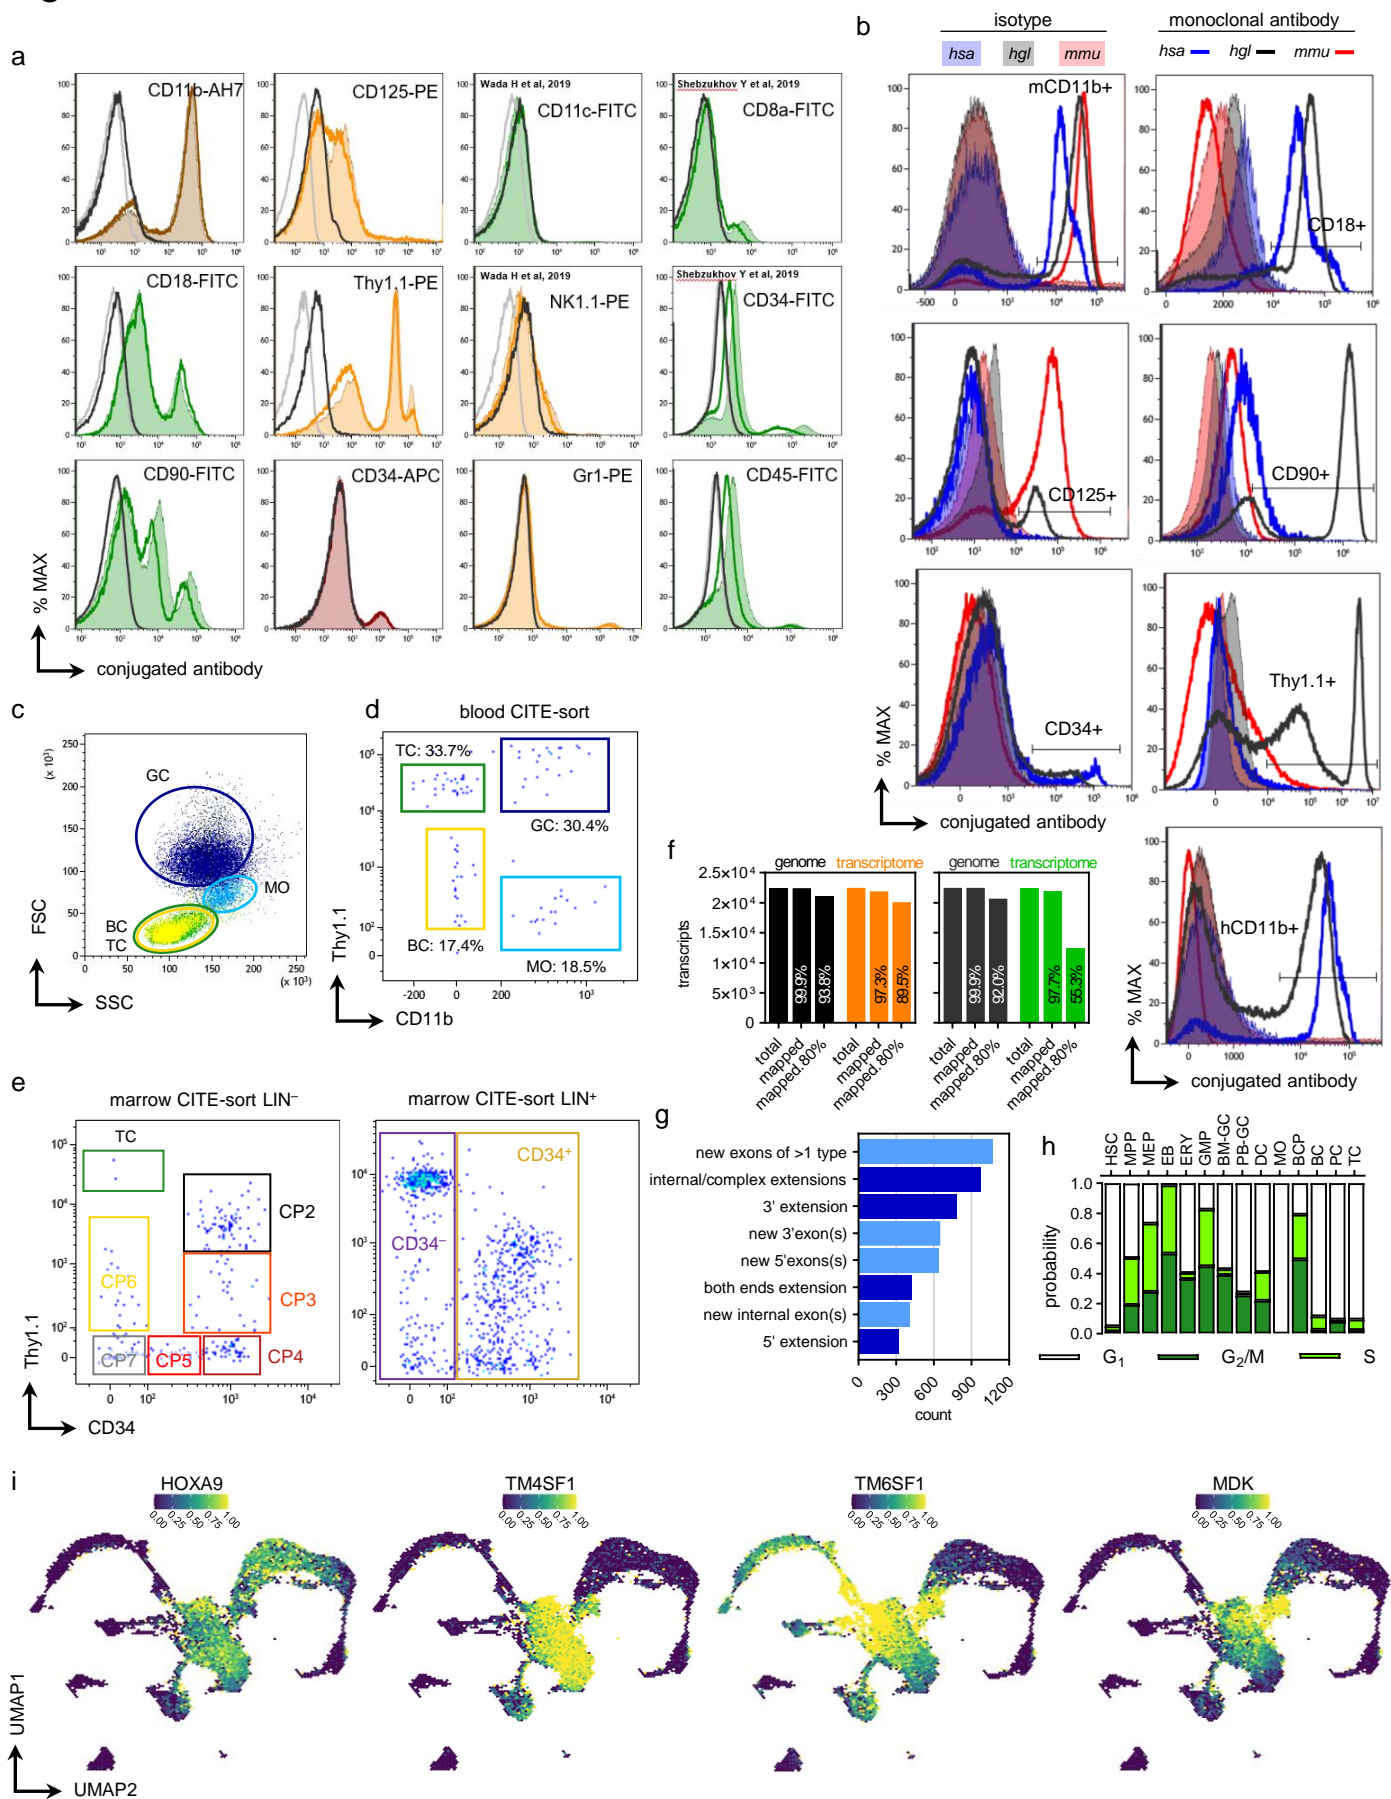

1397 **Fig. S1. FACS antibody staining pattern validation, transcriptome assembly statistics,**  
1398 **sorting input for naked mole-rat scRNA-Seq, literature scRNA-Seq datasets**  
1399 **a**, Single color flow cytometry histograms of naked mole-rat BM stained for indicated surface  
1400 markers with off-the-shelf monoclonal FACS antibodies (moAb), conjugates are suffixed as:  
1401 FITC, fluorescein isothiocyanate; PE, phycoerythrin; APC, allophycocyanin; AH7, APC-Cy7.  
1402 Grey line, unstained BM; black line, isotype; colored line, Fc Blocker cocktail + moAb; colored  
1403 Area-Under-Curve (AUC), moAb. Antibodies cross-reactive with naked mole-rat cells described  
1404 previously are indicated by the respective reference in the top left histogram corner. **b**, Single  
1405 color flow cytometry histograms of human (*hsa*), mouse (*mmu*) and naked mole-rat (*hgl*) BM  
1406 stained for indicated surface markers; solid line, Fc Blocker cocktail + isotype; shaded AUC, Fc  
1407 Blocker cocktail + moAb. **c**, FACS backgating of indicated populations from Figure 1B into side  
1408 (SSC) and forward (FSC) scatters. Major blood cell type gates for lymphocytes, monocytes and  
1409 granulocytes were gated and colored as shown in Fig. 1b. **d**, Postsort with 92 viable events of the  
1410 sorting strategy for PB CITE-Seq, sorting gates referring to Fig. 1b. **e**, Postsort of LIN<sup>-</sup> BM (left  
1411 panel) with 242 viable events, sorting gates referring to Figure 2C; LIN<sup>+</sup> BM (right panel) with  
1412 1027 viable events; sorting gates indicated. **f**, FRAMA transcriptome mapped to ENSEMBL  
1413 genome and transcriptome using cds (left) or full transcript sequence (right). Total, total annotated  
1414 transcripts; mapped, blastn FRAMA exon contig alignment mapped to genomic coordinates  
1415 (>95% identity, e-value<1e<sup>-5</sup>); mapped 80%, mapping FRAMA exon contig with >80% mapping  
1416 coverage (percent of contig length covered by blastn alignments). **g**, Structural differences in  
1417 FRAMA transcripts with a difference in mapping coverage between genome and ENSEMBL  
1418 transcriptome of >20%; lightblue, transcripts with new exons; darkblue, transcripts with exon  
1419 extensions. **h**, *Seurat* cell cycle scoring of sorted naked mole-rat PB and BM (NMR dataset) with  
1420 clustering from Fig. 1g. **i**, UMAP-based hexbin projection of NMR dataset with clustering from  
1421 Fig. 1g; scaled expression as probability for each conserved gene. HOXA9 3.6-fold up in HSC,  
1422 2.1-fold up in MPP; TM4SF1 6.7-fold up in HSC, 3.9-fold up in MPP; TM6SF1 3.5-fold up in  
1423 BM-GC, 2.7-fold up in PB-GC, 2.5-fold up in GMP; MDK 4-fold up in MEP, 3.1-fold up in  
1424 MPP, 2.1-fold up in HSC.  
1425

Fig. S2

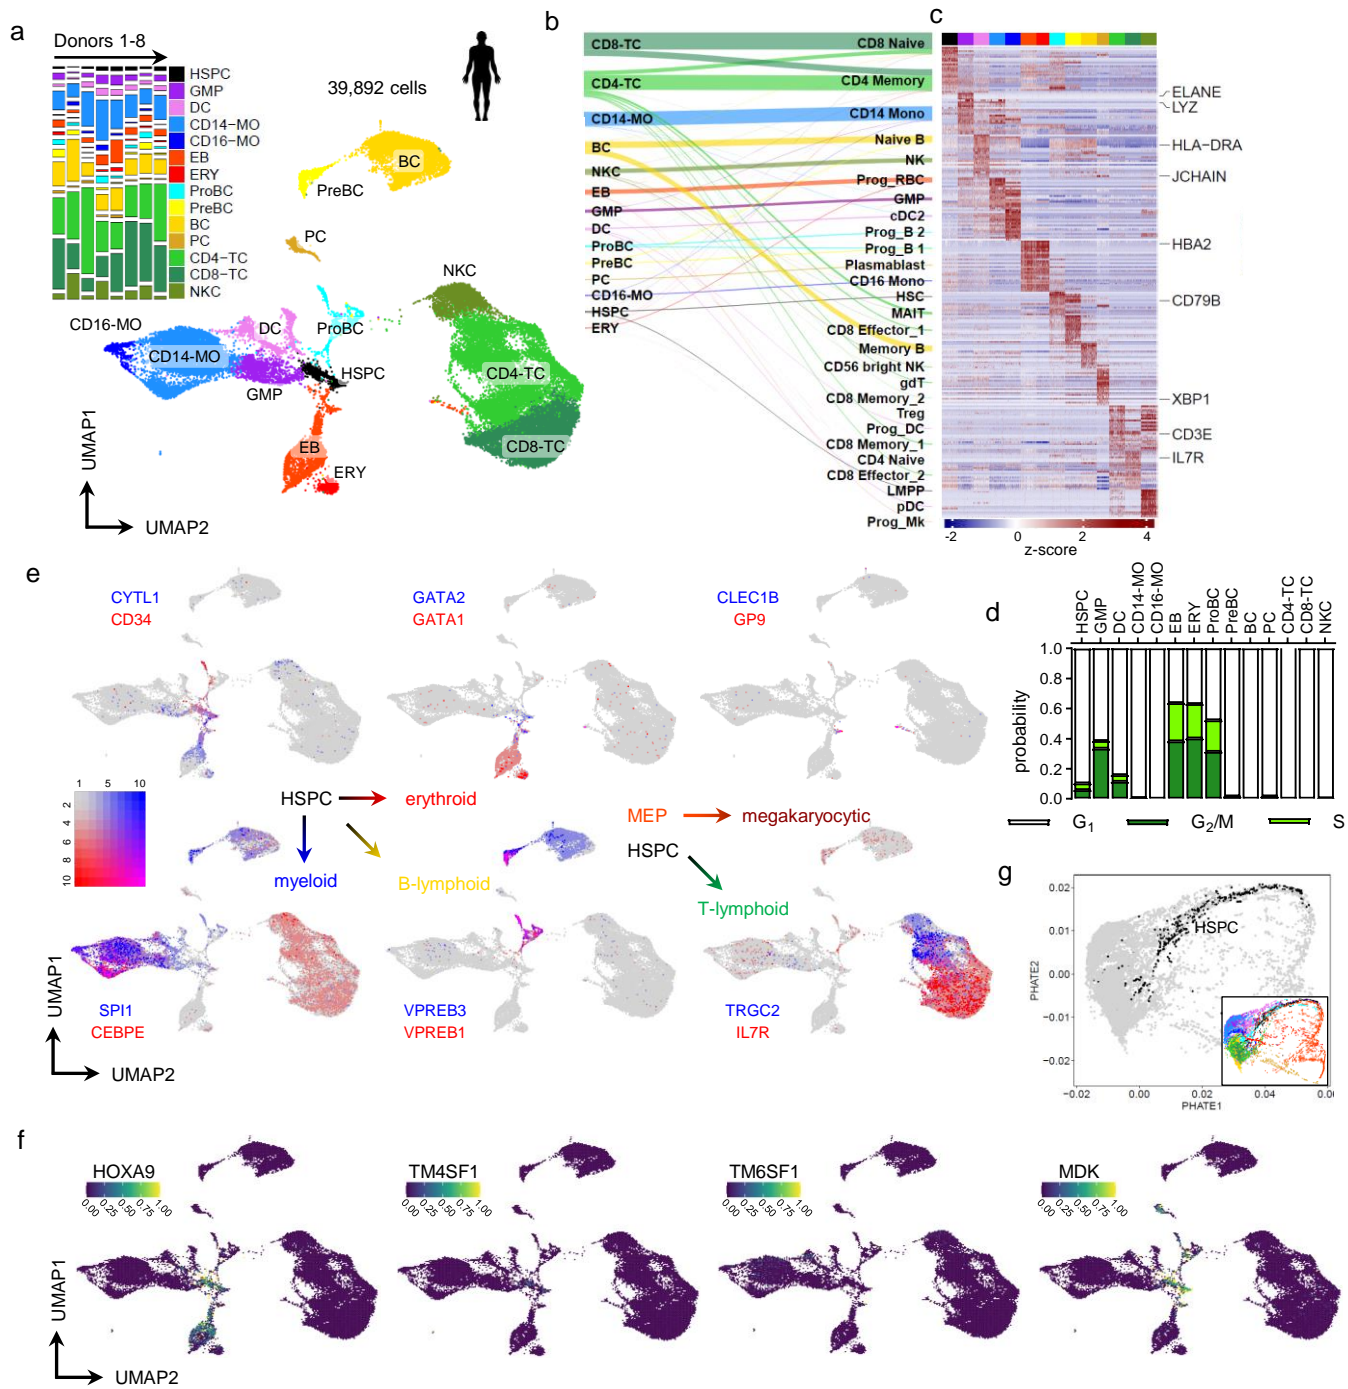

1426 **Fig. S2. The Human Cell Atlas (HCA) dataset as random down-sampled per-donor version**  
1427 **distributed via the SeuratData package.**

1428 **a**, UMAP of Louvain-clustered single-cell transcriptomes, color legend is used throughout this  
1429 dataset; 4603 differentially expressed genes were used for fGSEA-based cell type annotation.  
1430 Tile-stack inset reflects relative cluster frequencies [y] and donor library fractions of the dataset  
1431 [x] as probability. HSPC, hematopoietic stem progenitor cells; CD14-MO, CD14<sup>+</sup>/CD16<sup>lo</sup>  
1432 monocytes; CD16-MO, CD14<sup>+</sup>/CD16<sup>hi</sup> monocytes; ProBC, B progenitor; PreBC, B precursor;  
1433 CD4-TC, CD4<sup>+</sup>/CD8<sup>-</sup> T cell; CD8-TC, CD4<sup>-</sup>/CD8<sup>+</sup> T cell; NKC, natural killer cell. **b**, Sankey  
1434 diagram connecting annotated Louvain clusters [left] with MNN-projected cell identities from a  
1435 separate human BM CITE-Seq dataset [right] (87). **c**, Heatmap showing top 25 overexpressed  
1436 genes by fold-change of 14 single cell clusters from BM mononuclear cells randomly  
1437 downsampled to  $\leq 500$  cells, NMR dataset heatmap marker orthologs are labelled. **d**, *Seurat* cell  
1438 cycle scoring of HCA dataset. **e**, UMAP-based Blendplots showing pairs conserved lineage  
1439 markers; gene1 (red, high expression), gene2 (blue, high expression) and co-expressing cells  
1440 (purple). See scale on the right; expression, scaled UMI counts. **f**, (O) UMAP-based hexbin  
1441 projection of HCA dataset; scaled expression as probability for each conserved gene. HOXA9  
1442 low in HSPC, EB; TM4SF1 very low in HSPC; TM6SF1 not detected; MDK 3.2-fold up in  
1443 HSPC. NMR dataset: HOXA9 3.6-fold up in HSC, 2.1-fold up in MPP; TM4SF1 6.7-fold up in  
1444 HSC, 3.9-fold up in MPP; TM6SF1 3.5-fold up in BM-GC, 2.7-fold up in PB-GC, 2.5-fold up in  
1445 GMP; MDK 4-fold up in MEP, 3.1-fold up in MPP, 2.1-fold up in HSC. **g**, PHATE  
1446 dimensionality reduction of single-cell transcriptomes, HSPC cluster is highlighted in black; inset  
1447 depicts model colored by annotation from (J), showing the HSPC cluster linked to erythroid,  
1448 lymphoid and myeloid branch clusters.

Fig. S3

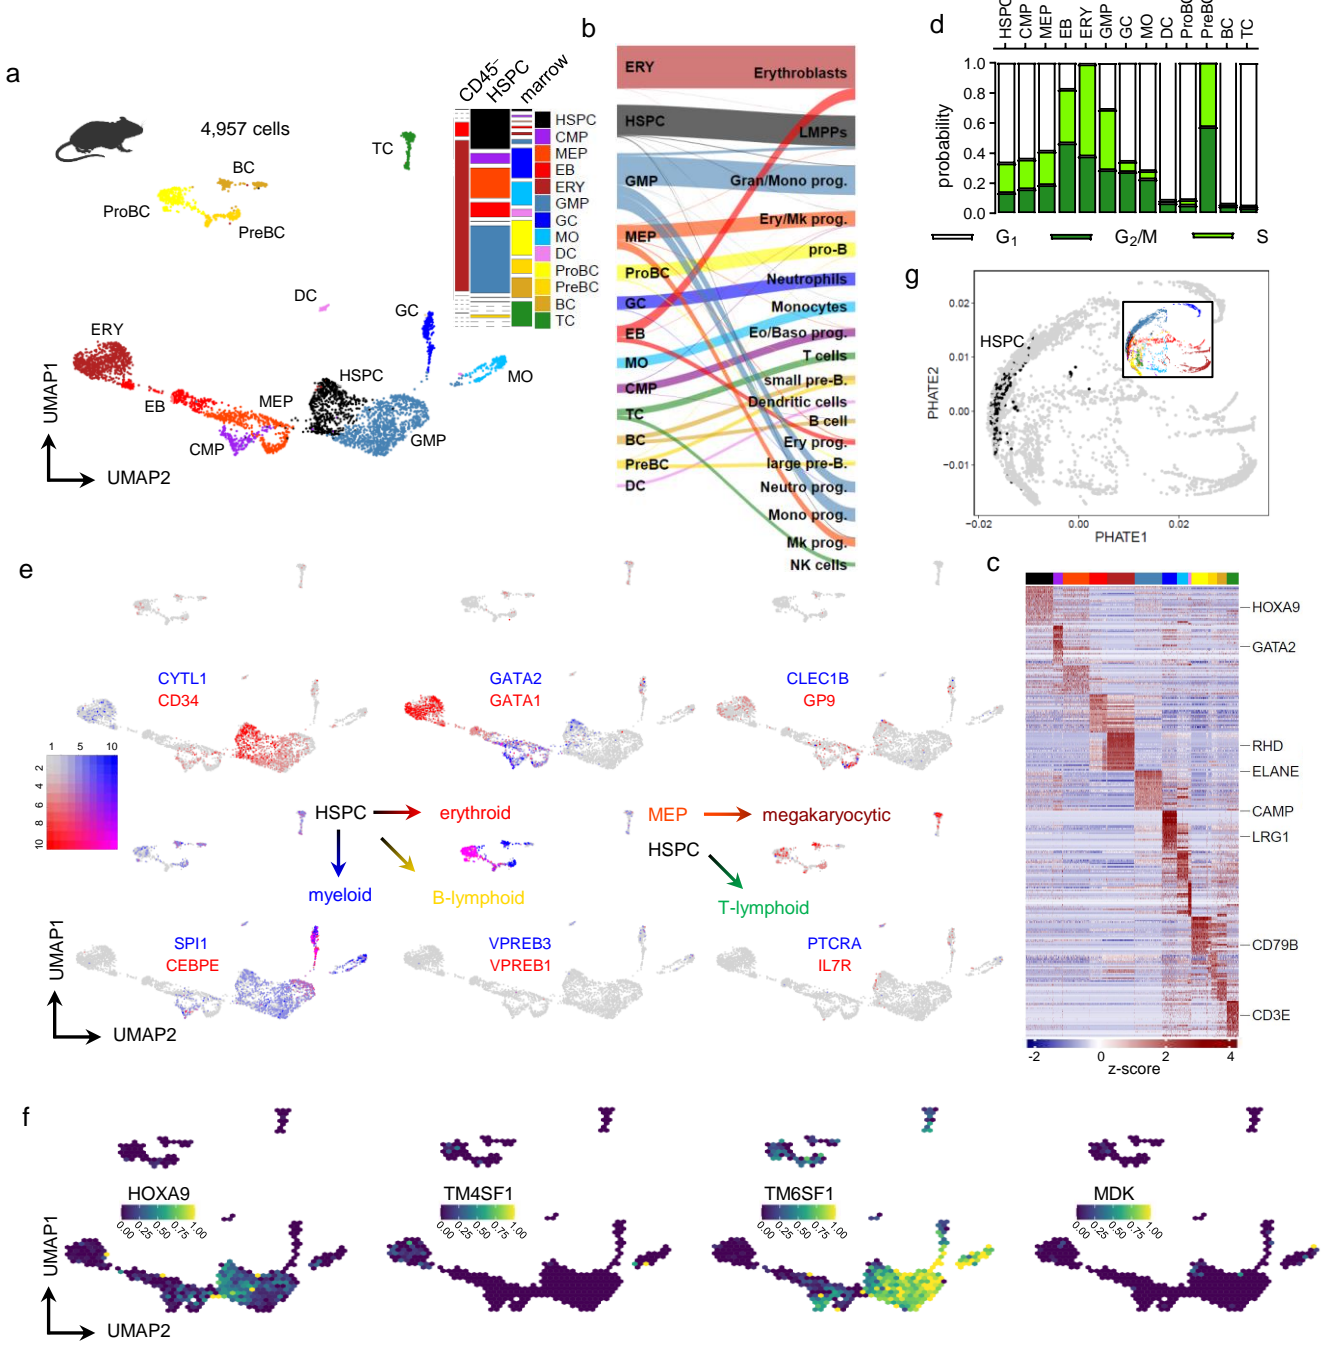

1449 **Fig. S3. The RNA Magnet (RM) droplet dataset (85).**  
1450 **a**, UMAP of Louvain-clustered single-cell transcriptomes, color legend is used throughout this  
1451 dataset; 1906 differentially expressed genes were used for fGSEA-based cell type annotation.  
1452 Tile-stack inset reflects relative cluster frequencies [y] and sorted fractions of the dataset [x] as  
1453 probability. CMP, common myeloid progenitor. **b**, Sankey diagram connecting annotated Louvain  
1454 clusters [left] with original RNA Magnet annotation [right]. **c**, Heatmap showing top 25  
1455 overexpressed genes by fold-change of 13 single cell clusters from sorted marrow cells randomly  
1456 downsampled to  $\leq 500$  cells, NMR dataset heatmap marker orthologs are labelled. **d**, *Seurat* cell  
1457 cycle scoring of TM dataset. **e**, UMAP-based Blendplots showing pairs conserved lineage  
1458 markers; gene1 (red, high expression), gene2 (blue, high expression) and co-expressing cells  
1459 (purple). See scale on the right; expression, scaled UMI counts. **f**, UMAP-based hexbin projection  
1460 of RM dataset; scaled expression as probability for each conserved gene. HOXA9 2.3-fold up in  
1461 HSPC; TM4SF1, MDK not detected; TM6SF1 high in GMP, GC, MO. **g**, PHATE model of RM  
1462 dataset, HSPC cluster is highlighted in black; inset depicts color annotation from a, showing the  
1463 HSPC cluster connected to erythroid, lymphoid and myeloid clusters.



# Fig. S4

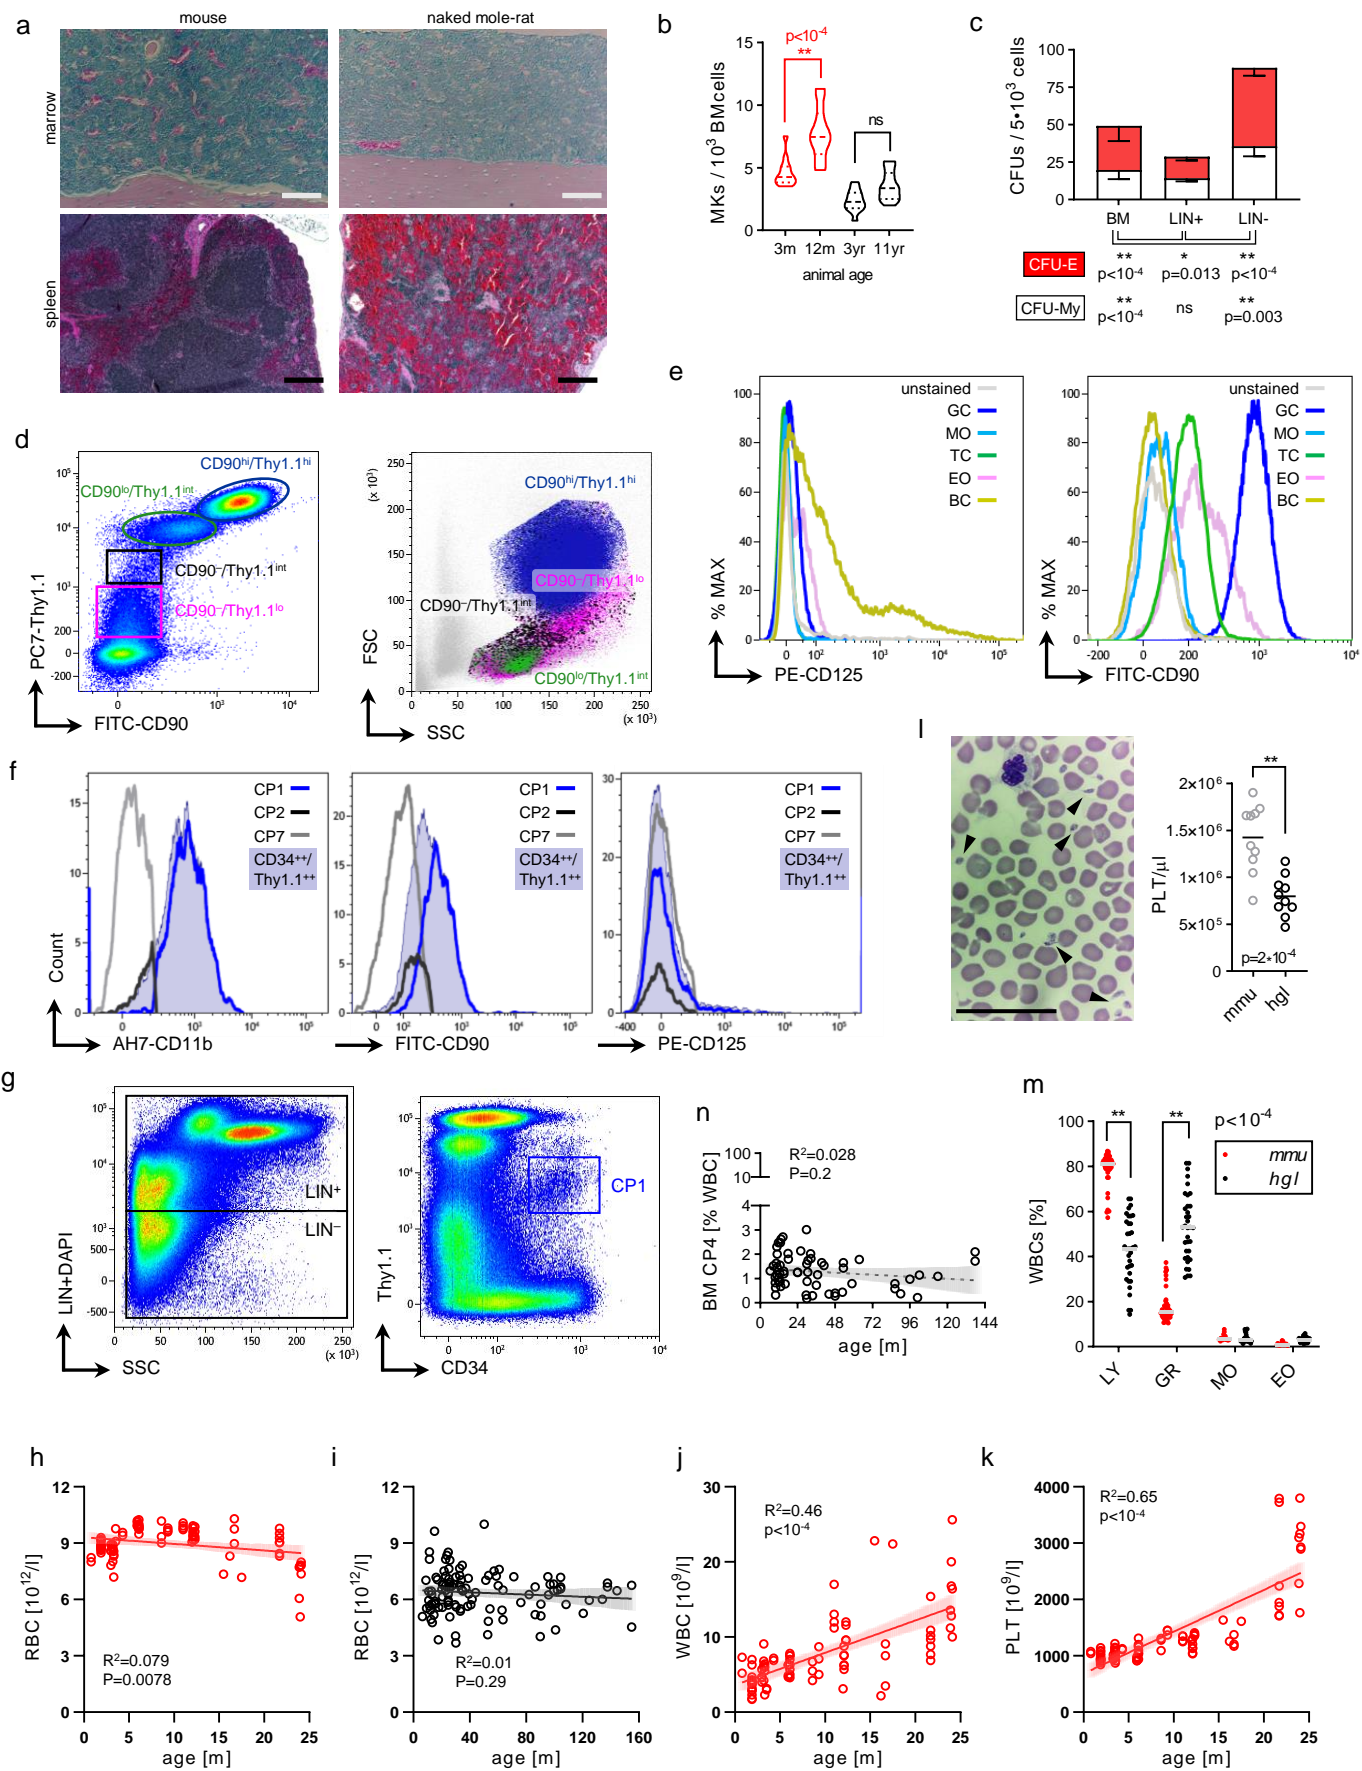

1464 **Fig. S4. Lineage cocktail (LIN) validation, Hemanalyzer data.**  
1465 **a**, Giemsa staining of femur sections, medullary canal of diaphysis; Scale bar 100 $\mu$ m [top].  
1466 Hematoxylin & Eosin staining of spleen sections; Scale bar 200 $\mu$ m [bottom]. **b**, Megakaryocyte  
1467 (MK) Scoring of BM Giemsa sections; red, mouse; black, naked mole-rat. P-values were  
1468 determined by One-way ANOVA; n=2. **c**, Colony assay grown at 37°C; CFU-E, colony forming  
1469 unit erythroid; CFU-My, colony forming unit myeloid. Error bars denote s.d., p-value determined  
1470 by Sidak's Two-way ANOVA; n=4. **d**, Viable BM cells stained with CD90 and Thy1.1 [top] give  
1471 rise to two double positive populations. Backgating into scatter channels [bottom] revealed  
1472 CD90<sup>hi</sup>/Thy1.1<sup>hi</sup> cells are restricted to granulocyte scatter properties (darkblue) as were  
1473 Thy1.1<sup>hi</sup>/CD11b<sup>+</sup> PB-GCs, while CD90<sup>lo</sup>/Thy1.1<sup>int</sup> cells appear to be lymphocytes (green), as seen  
1474 for Thy1.1<sup>int</sup>/CD11b<sup>-</sup> TCs in blood. CD90<sup>-</sup>/Thy1.1<sup>int</sup> and CD90<sup>-</sup>/Thy1.1<sup>lo</sup> cells contain naked  
1475 mole-rat HSPCs and have heterogeneous size and low granularity, compared to human HSPCs  
1476 predominantly sized between lymphocytic and monocytic leukocyte types (88). FITC, fluorescein  
1477 isothiocyanate; PC7, PE-Cy7; SSC, side scatter; FSC, forward scatter. **e**, Histograms of CD125  
1478 [left] and CD90 [right] of PB leukocytes with cell type gates from Fig. 1b; % MAX, scales the  
1479 maximum of all datasets at the same level. CD125 is exclusively found a BC subset, GCs are  
1480 CD90<sup>hi</sup> and Eos, TCs are CD90<sup>lo</sup>, BCs, MOs are CD90<sup>-</sup>. **f**, Signal intensities of CD11b [left],  
1481 CD90 [middle] and CD125 [right] of indicated BM cell fractions; Grey line, CP7; black line,  
1482 CP2/LTC; blue line, CP1; viable CD34<sup>hi</sup>/Thy1.1<sup>int</sup> not LIN gated, steelblue AUC. FITC,  
1483 fluorescein isothiocyanate; PE, phycoerythrin; AH7, APC-Cy7. **g**, Sorting strategy for spleen cells  
1484 with lineage (LIN) depletion [left] and gating of LIN<sup>+</sup> CP1 [right]; Note the prominent LIN<sup>dim</sup>  
1485 population as a spleen-specific staining pattern defining the upper limit for the LIN<sup>-</sup> boundary.  
1486 We set the LIN<sup>-</sup> gate at the transition towards LIN<sup>+</sup>/SSC<sup>low</sup> cells similar to BM (Fig. 2a). In mice  
1487 the frequency of repopulating, self-renewing stem cells is ~10-fold lower in spleen compared to  
1488 BM (89). Median BM LTC/CP2 are 0.151%, median spleen LTC 0.038%, ~4-fold lower in spleen  
1489 (Fig. 2c-f). Hemanalyzer volumetric RBC numbers across animal age for **h**, C57BL/6 mice  
1490 (n=88) or **i**, naked mole-rats (n=115). R<sup>2</sup>, Pearson correlation coefficient; p-values were  
1491 determined by conventional linear regression fitting both slope and intercept. Volumetric **j**, white  
1492 blood cell (WBC) and **k**, platelet (PLT) numbers for C57BL/6 mice. R<sup>2</sup>, coefficient of  
1493 determination; p-values were determined by conventional linear regression fitting both slope and  
1494 intercept; n=88. **l**, Wright staining of naked mole-rat PB film [left], arrows indicate scored  
1495 platelets; Scale bar 50 $\mu$ m. Scoring of PB films [right], p-values were determined by unpaired  
1496 Student's t-test; n=10. **m**, Hemanalyzer WBC subset frequencies (% of total leukocytes); p-values

1497 were obtained from Sidak's two-way ANOVA. Mouse, n=45; naked mole-rat, n=36. **n**, BM CP4  
1498 frequencies across age; n=60, linear regression with 95% CI as trend line; p<0.05, significance.

Fig. S5

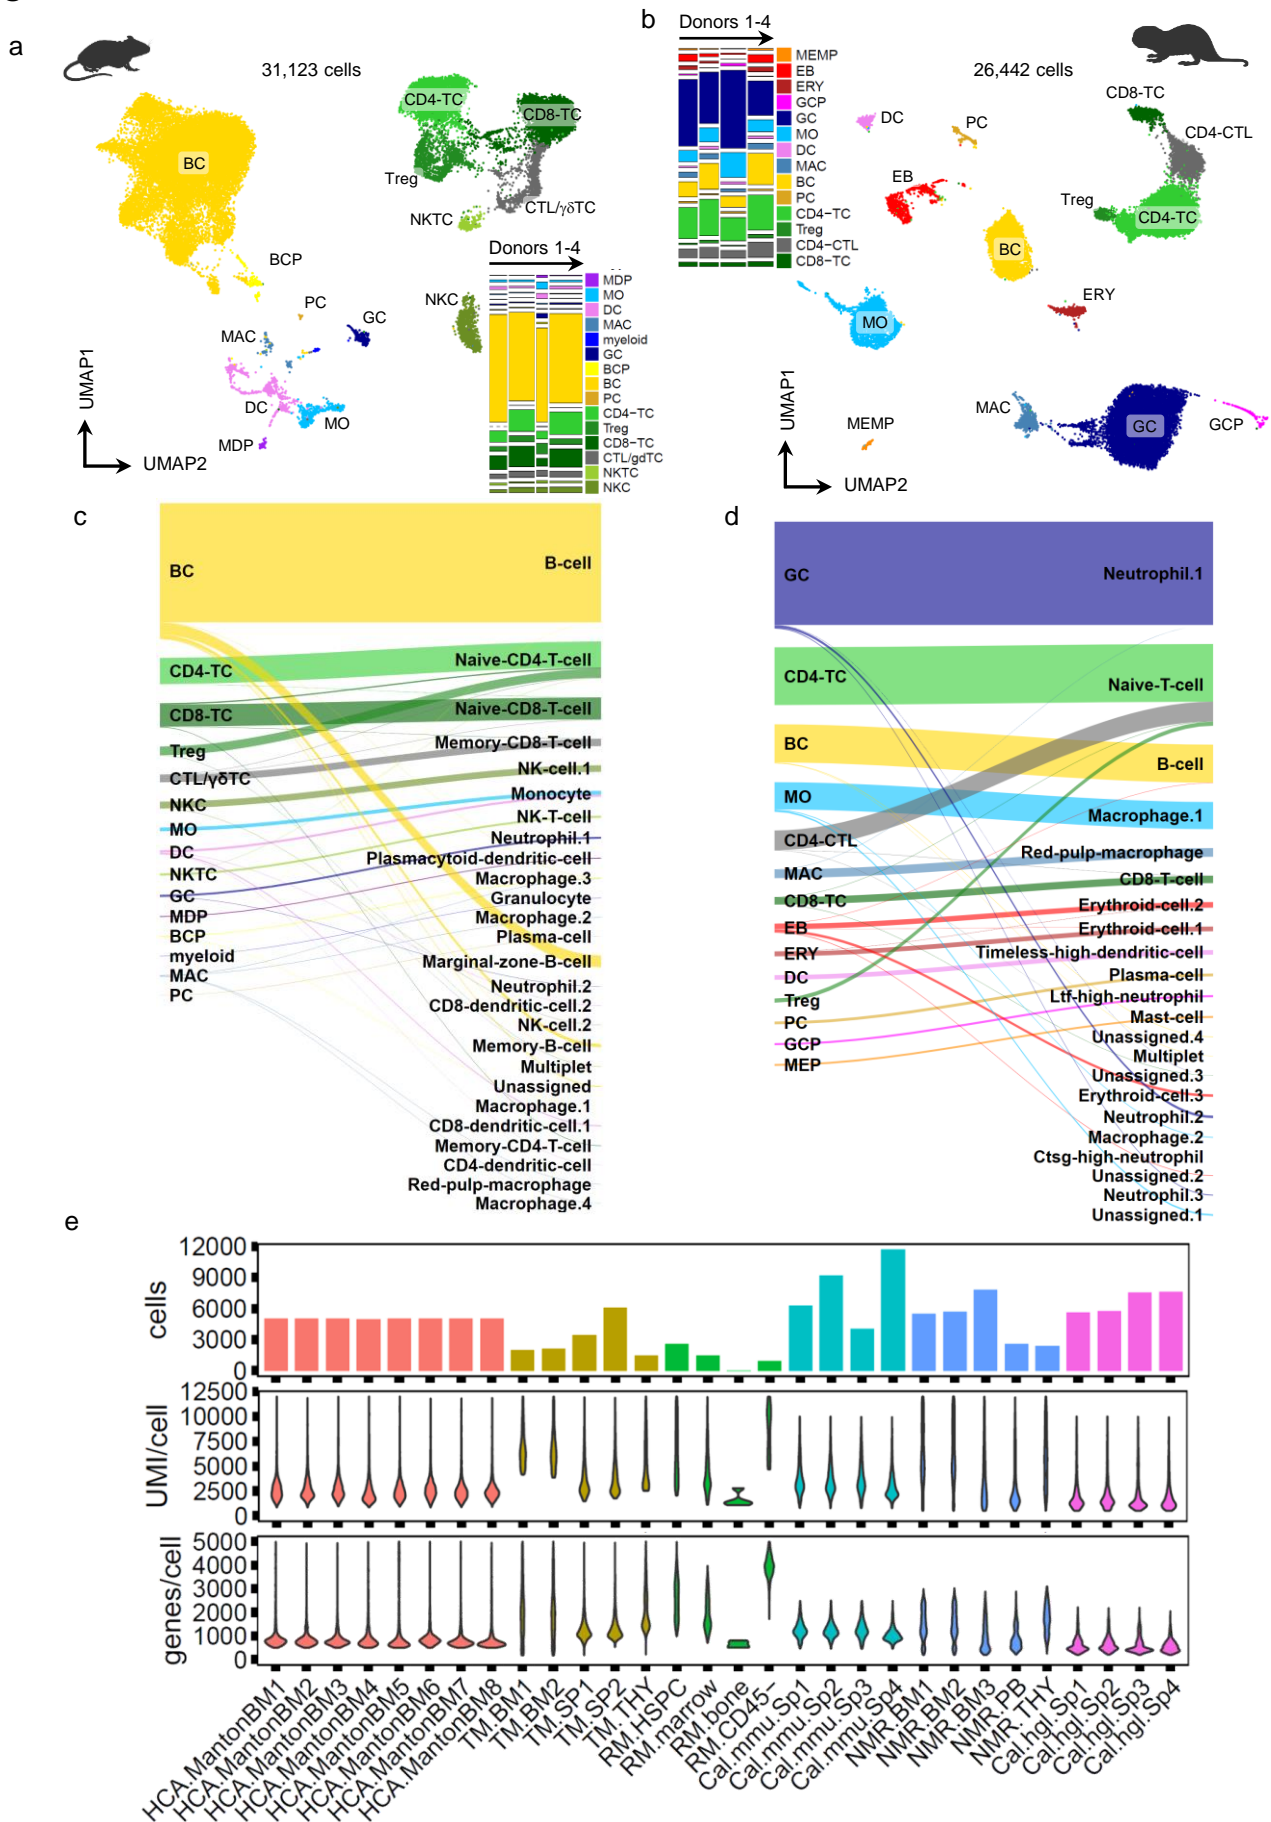

1499 **Fig. S5. The Calico droplet dataset (26).**  
1500 UMAP of Louvain-clustered **a**, mouse or **b**, naked mole-rat whole spleen single-cell  
1501 transcriptomes, color legend is used throughout this dataset; 1906 differentially expressed genes  
1502 were used for fGSEA-based cell type annotation. Tile-stack inset reflects relative cluster  
1503 frequencies [y] and donor fractions of the dataset [x] as probability. MDP, monocytic dendritic  
1504 progenitor. Sankey diagram connecting annotated Louvain clusters [left] with original Calico  
1505 annotation [right] for **c**, mouse or **d**, naked mole-rat. **e**, Quality metrics for all scRNA-Seq  
1506 datasets from Fig. 1, Fig. S2, 3, 5. Top, number of single cells per demultiplexed and filtered  
1507 library; Middle, UMI counts per cell for each library; Bottom, detected genes per cell for each  
1508 library. BM, bone marrow; SP, spleen; THY, thymus; *mmu*, mouse; *hgl*, naked mole-rat.

Fig. S6

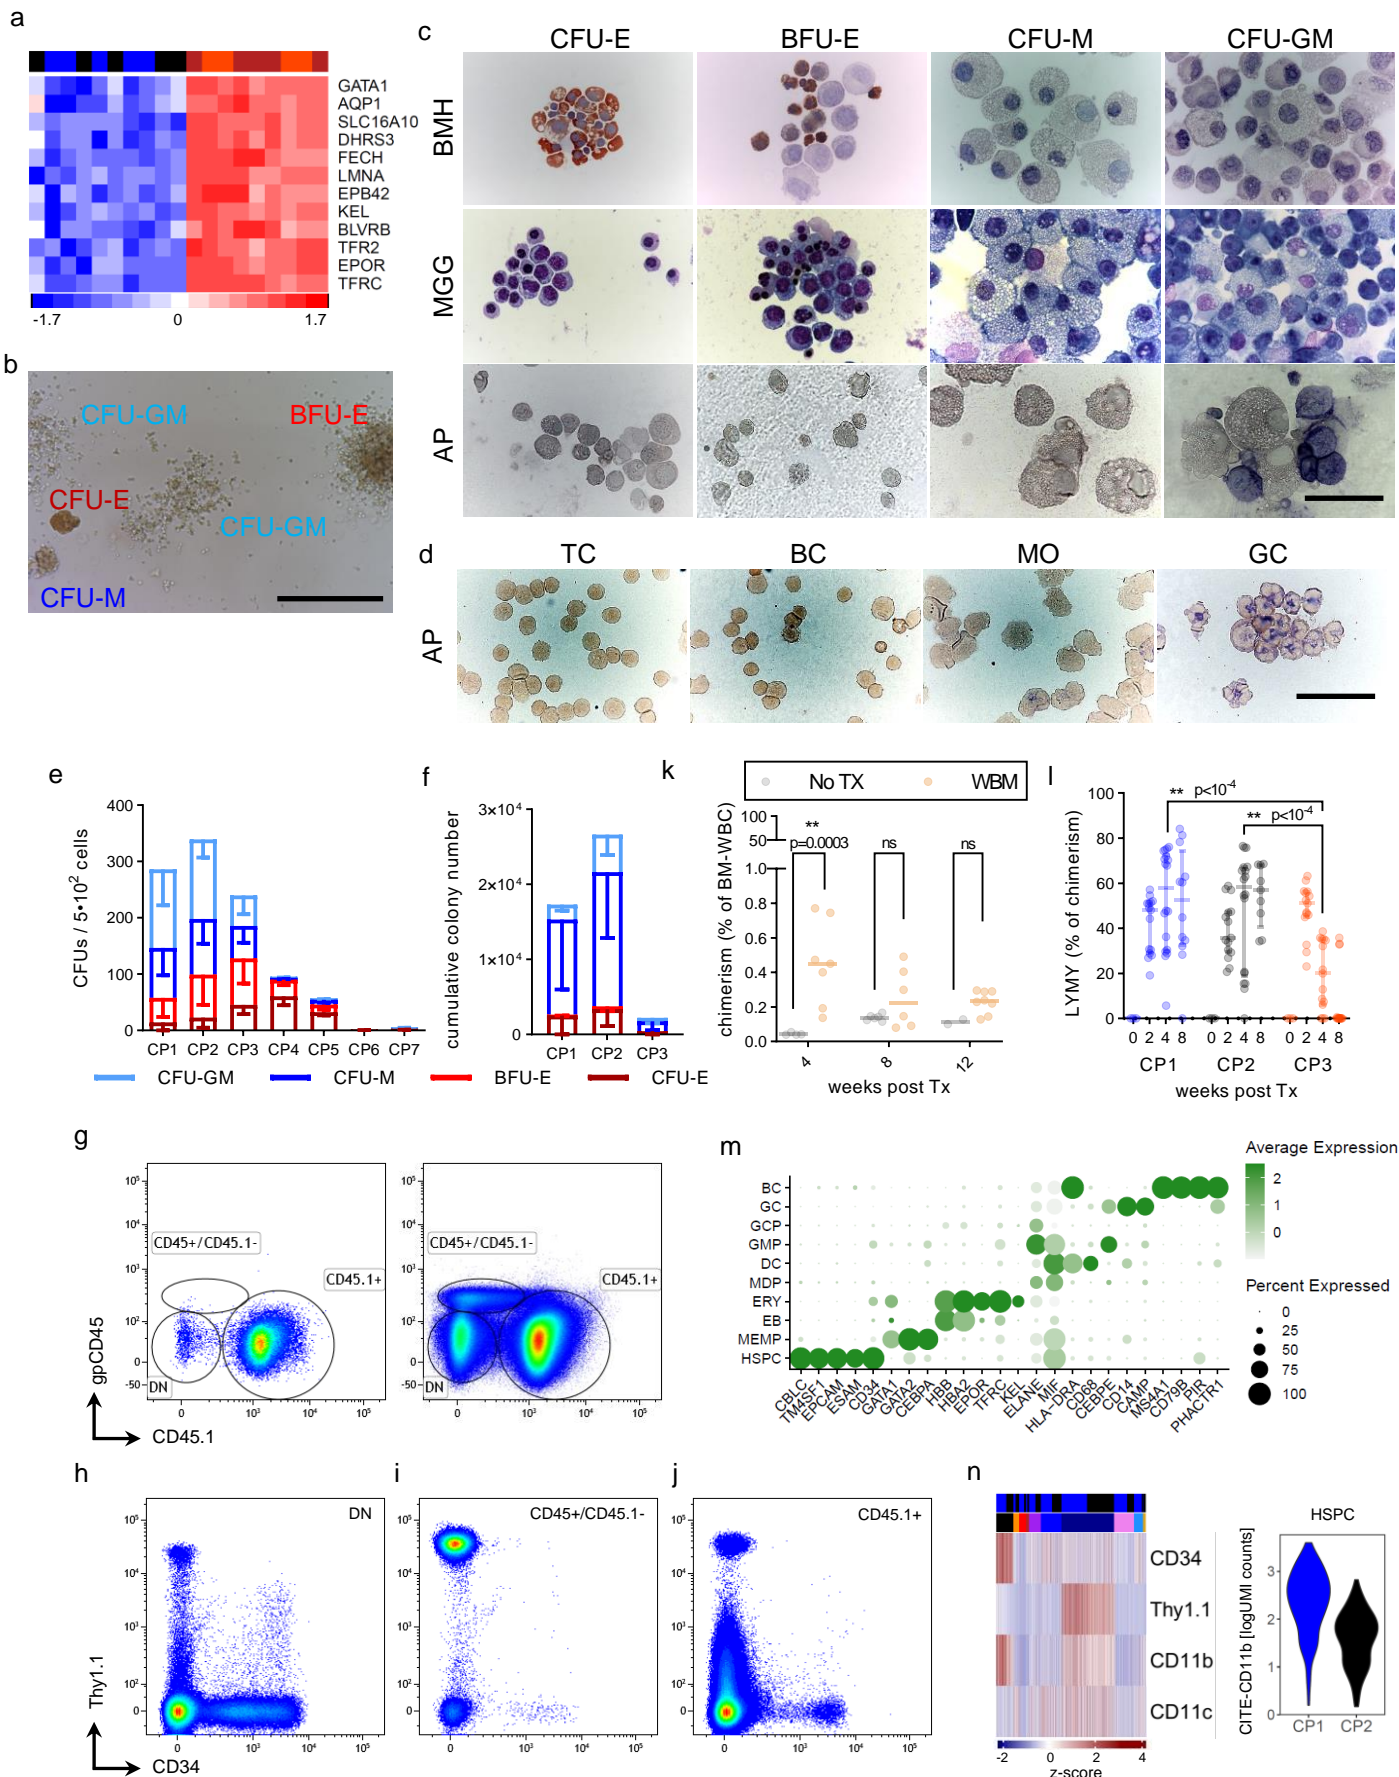

1509 **Fig. S6. BM CP1-4 bulk RNA-Seq, Colony assays, Xenografts.**  
1510 **a**, Top color bar reflects population clustering by Euclidean distance using top 12 MEP/erythroid  
1511 leading edge genes; color key as in Fig. 3a. Genes were obtained by ssGSEA of combining CP1/2  
1512 (n=10) versus CP3/4 (n=10) populations and performing differential gene expression (DGE)  
1513 testing, see also Table S4. **b**, Representative image of colony morphologies grown at 32°C. BFU-  
1514 E, burst forming unit erythroid; CFU-E, colony-forming unit erythroid; CFU-M, colony forming  
1515 unit macrophage; CFU-GM, colony-forming unit granulocyte-monocyte; Scale bar 250µm. **c**,  
1516 Benzidine (top row, BMH), May-Grünwald-Giemsa (2<sup>nd</sup> from top, MGG) and Alkaline  
1517 Phosphatase (3<sup>rd</sup> from top, AP) stainings of picked colonies; scale bar 50µm. Erythroid CFU and  
1518 BFU cells contained hemoglobin, the latter at lower frequency than the more mature CFU-E.  
1519 CFU-M exclusively consisted of large cells with colorless vesicles and a high cytoplasmic/nuclear  
1520 ratio, while CFU-GM (granulocyte/monocyte) also comprised AP<sup>+</sup> cells. **d**, Alkaline Phosphatase  
1521 (AP) staining of sorted PB cells (bottom row); scale bar 50µm. Naked mole-rat PB-GCs are AP<sup>+</sup>,  
1522 other WBC subsets AP<sup>-</sup>. **e**, Colony assay (n=5) or **f**, Replated assays (n=3) of sorted naked mole-  
1523 rat BM CPs, grown at 32°C. Error bars denote s.d., p-value determined by Sidak's Two-way  
1524 ANOVA. **g**, Untransplanted [right] and naked mole-rat CP2-transplanted [left] NSGS host BM  
1525 stained with guinea-pig CD45 and CD45.1; CP2 xenograft at week 4; DN, double negative. **h**, DN  
1526 fraction contains most CD34<sup>+</sup> and Thy1.1<sup>+</sup>/CD34<sup>+</sup> naked mole-rat cells and a Thy1.1<sup>-</sup>/CD34<sup>-</sup>  
1527 population potentially containing xenogenic CP7; **i**, CD45<sup>+</sup>/CD45.1<sup>-</sup> fraction contains most naked  
1528 mole-rat Thy1.1<sup>hi</sup>/CD34<sup>-</sup> BM-GCs; **j**, CD45.1<sup>+</sup> fraction features an abundant Thy1.1<sup>lo</sup>/CD34<sup>-</sup>  
1529 population resembling CP6 in naked mole-rat BM and spleen. **k**, Recipient chimerism in BM;  
1530 WBM, naked mole-rat whole bone marrow. **l**, Kinetics of engraftment proportions for LYMY  
1531 gate from Fig. 4d; p-value determined by Tukey's Two-way ANOVA. **m**, Top differentially  
1532 expressed cell type markers of integrated CP1/CP2 xenograft scRNA-Seq. **n**, CITE-signals for the  
1533 complete integrated xenograft scRNA-Seq dataset [right]. Graft color bar: CP1, blue; CP2, black.  
1534 Cell type annotation bar colors refer to Fig. 4l. CITE-CD11b levels per cell [right] for the HSPC  
1535 cluster from the integrated dataset.

Fig. S7

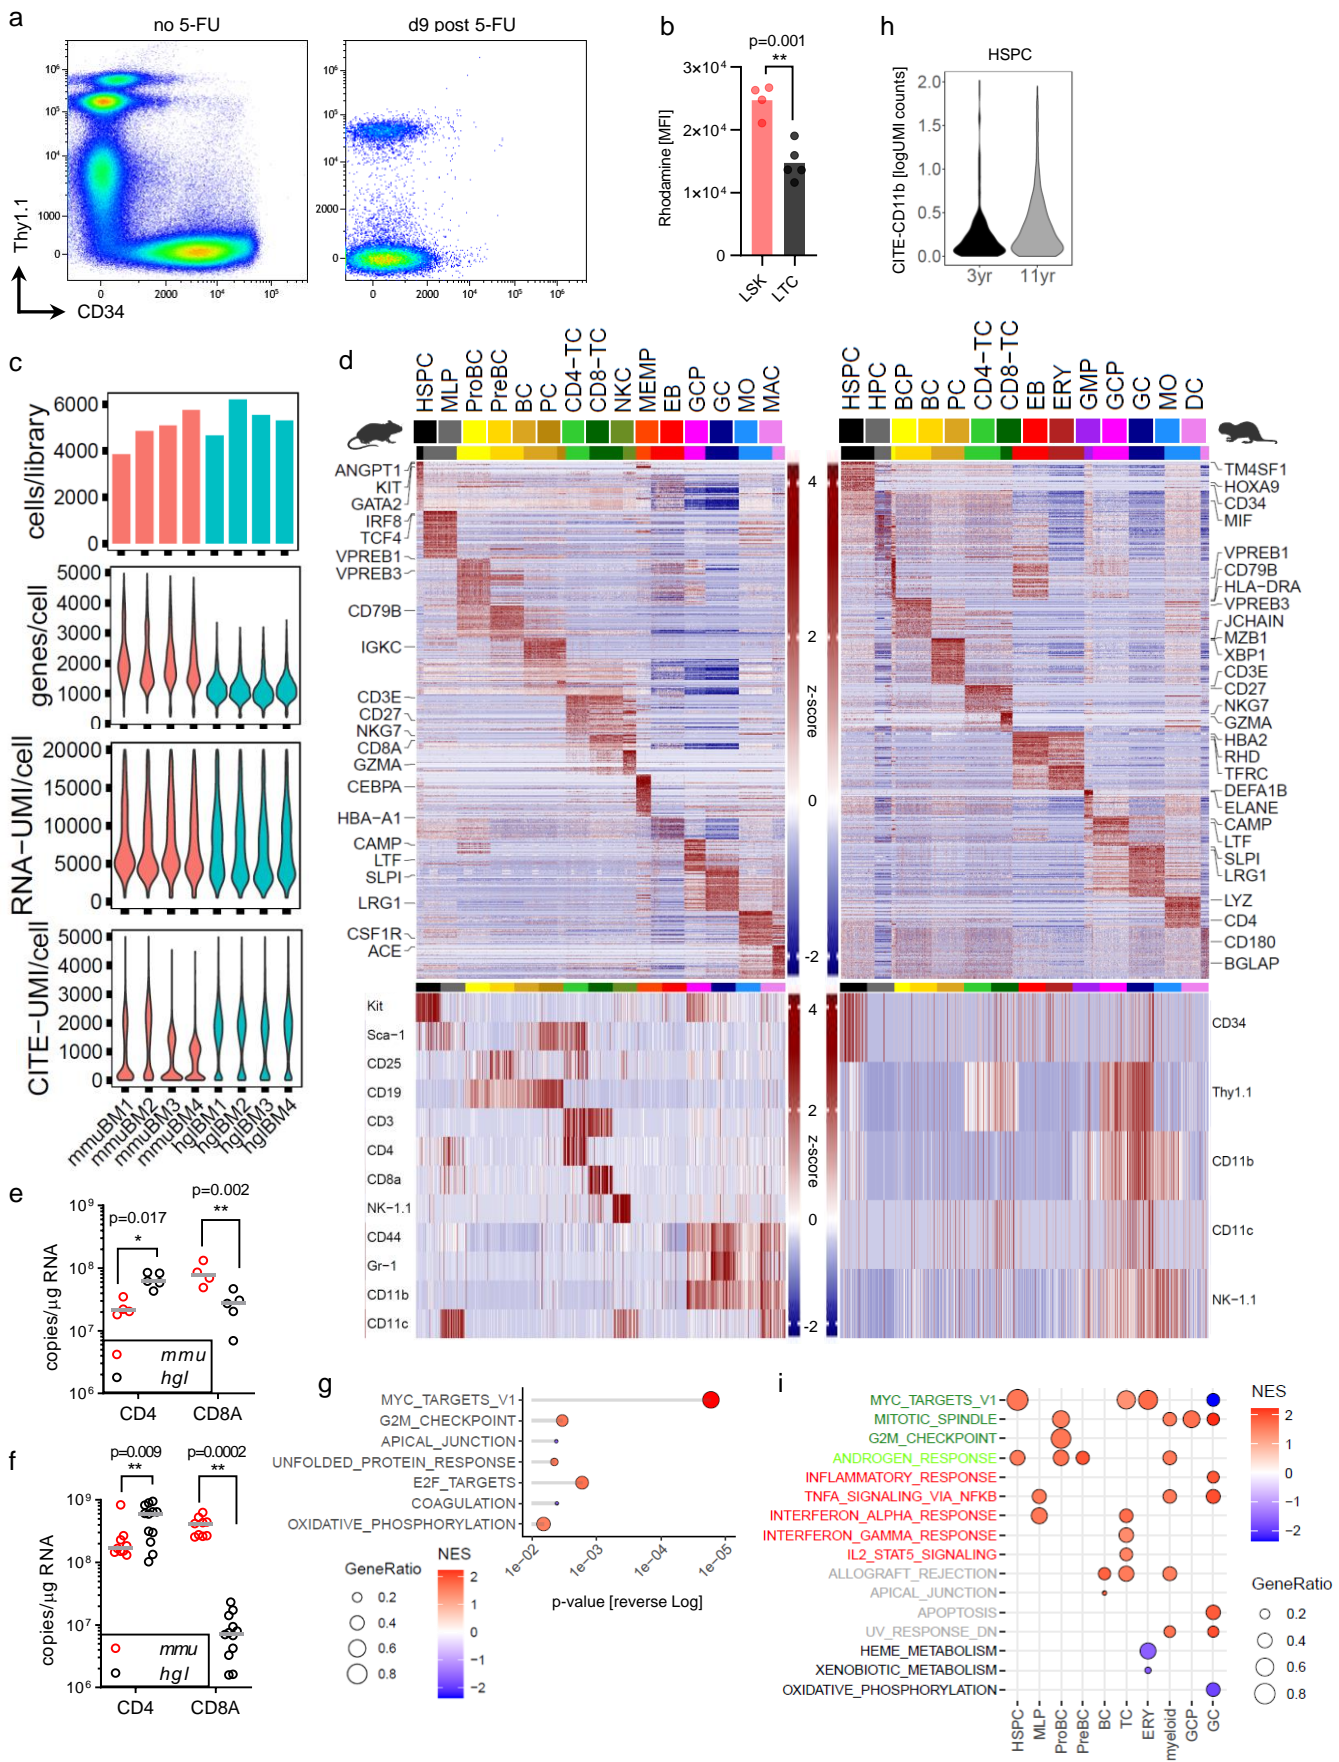



1536 **Fig. S7. Unfractionated BM scRNA-Seq QA, hierachical clustering, CD4:CD8 qPCR, age**  
1537 **groups, GSEA.**  
1538 **a**, Naked mole-rat spleen cells untreated or treated with 5-FU. A marrow Thy1.1<sup>int</sup>/CD34<sup>hi</sup> HSPC  
1539 population (Figure 3M) and an expanded splenic Thy1.1<sup>-</sup>/CD34<sup>lo/hi</sup> erythroid compartment are  
1540 clearly visible in untreated animals (1-3 year old). By contrast, 5-FU eliminates the entire  
1541 erythroid lineage in both organs and reduces marrow HSPCs to Thy1.1<sup>hi</sup>/CD34<sup>hi</sup> myeloid  
1542 progenitors. **b**, Mean Fluorescence Intensity (MFI) of Rhodamine efflux measurements in mouse  
1543 (n=4) and naked mole-rat (n=5) BM. p-value determined by unpaired Student's t-test. **c**, Quality  
1544 metrics for BM scRNA-Seq datasets from Fig. 5. Top, number of single cells per demultiplexed  
1545 and filtered library; 2<sup>nd</sup> from top, detected genes per cell; 3<sup>rd</sup> from top, mRNA UMI counts per  
1546 cell; Bottom, CITE UMI counts per cell for each library. BM, bone marrow; *mmu*, mouse; *hgl*,  
1547 naked mole-rat. No cell enrichment procedure was applied prior to sequencing, and RBC removal  
1548 through osmolysis rather than Percoll-based methods was used to capture the native marrow  
1549 WBC content from both species. **d**, Top heatmaps show the top 25 cell type specific markers for  
1550 mouse [left] and naked mole-rat [right] BM randomly downsampled to  $\leq 500$  cells/cluster,  
1551 canonical cell type markers from the literature are labelled. Bottom heatmaps show the cell type  
1552 specific CITE features for mouse [left] and naked mole-rat [right] BM randomly downsampled to  
1553  $\leq 100$  cells/cluster. Fold-change cut-off 2, p-value threshold 0.05. **e**, Absolute copy number  
1554 determination by qPCR for CD4 and CD8A transcripts in sorted PB-TCs from mouse (Cd11b<sup>-</sup>  
1555 /Gr-1<sup>-</sup>/Cd19<sup>-</sup>/Cd3e<sup>+</sup>; n=4) and naked mole-rat (CD11b<sup>-</sup>/Thy1.1<sup>int</sup>; n=5). P-values derived from  
1556 Sidak's two-way ANOVA. **f**, Absolute qPCR in whole cervical lymph nodes from mouse (n=9) or  
1557 naked mole-rat (n=12). P-values derived from Sidak's two-way ANOVA. **g**, GSEA with the  
1558 MSigDB hallmark geneset collection of differentially expressed genes across each individual  
1559 cluster (n=760) between 12 month vs 3 month old mice; p-value threshold 0.05. NES, normalized  
1560 enrichment score; GeneRatio, (signature  $\cap$  term) / (signature  $\cap$  all terms). **h**, CITE-CD11b levels  
1561 between 3 year vs 11 year HSPCs within naked mole-rat BM. **i**, GSEA with the MSigDB  
1562 hallmark geneset collection of differentially expressed genes across each individual cluster  
1563 (n=7206) between SCTransform-integrated mouse vs naked mole-rat BM; FDR q-value threshold  
1564 0.05. NES, normalized enrichment score; GeneRatio, (signature  $\cap$  term) / (signature  $\cap$  all terms).

Fig. S8

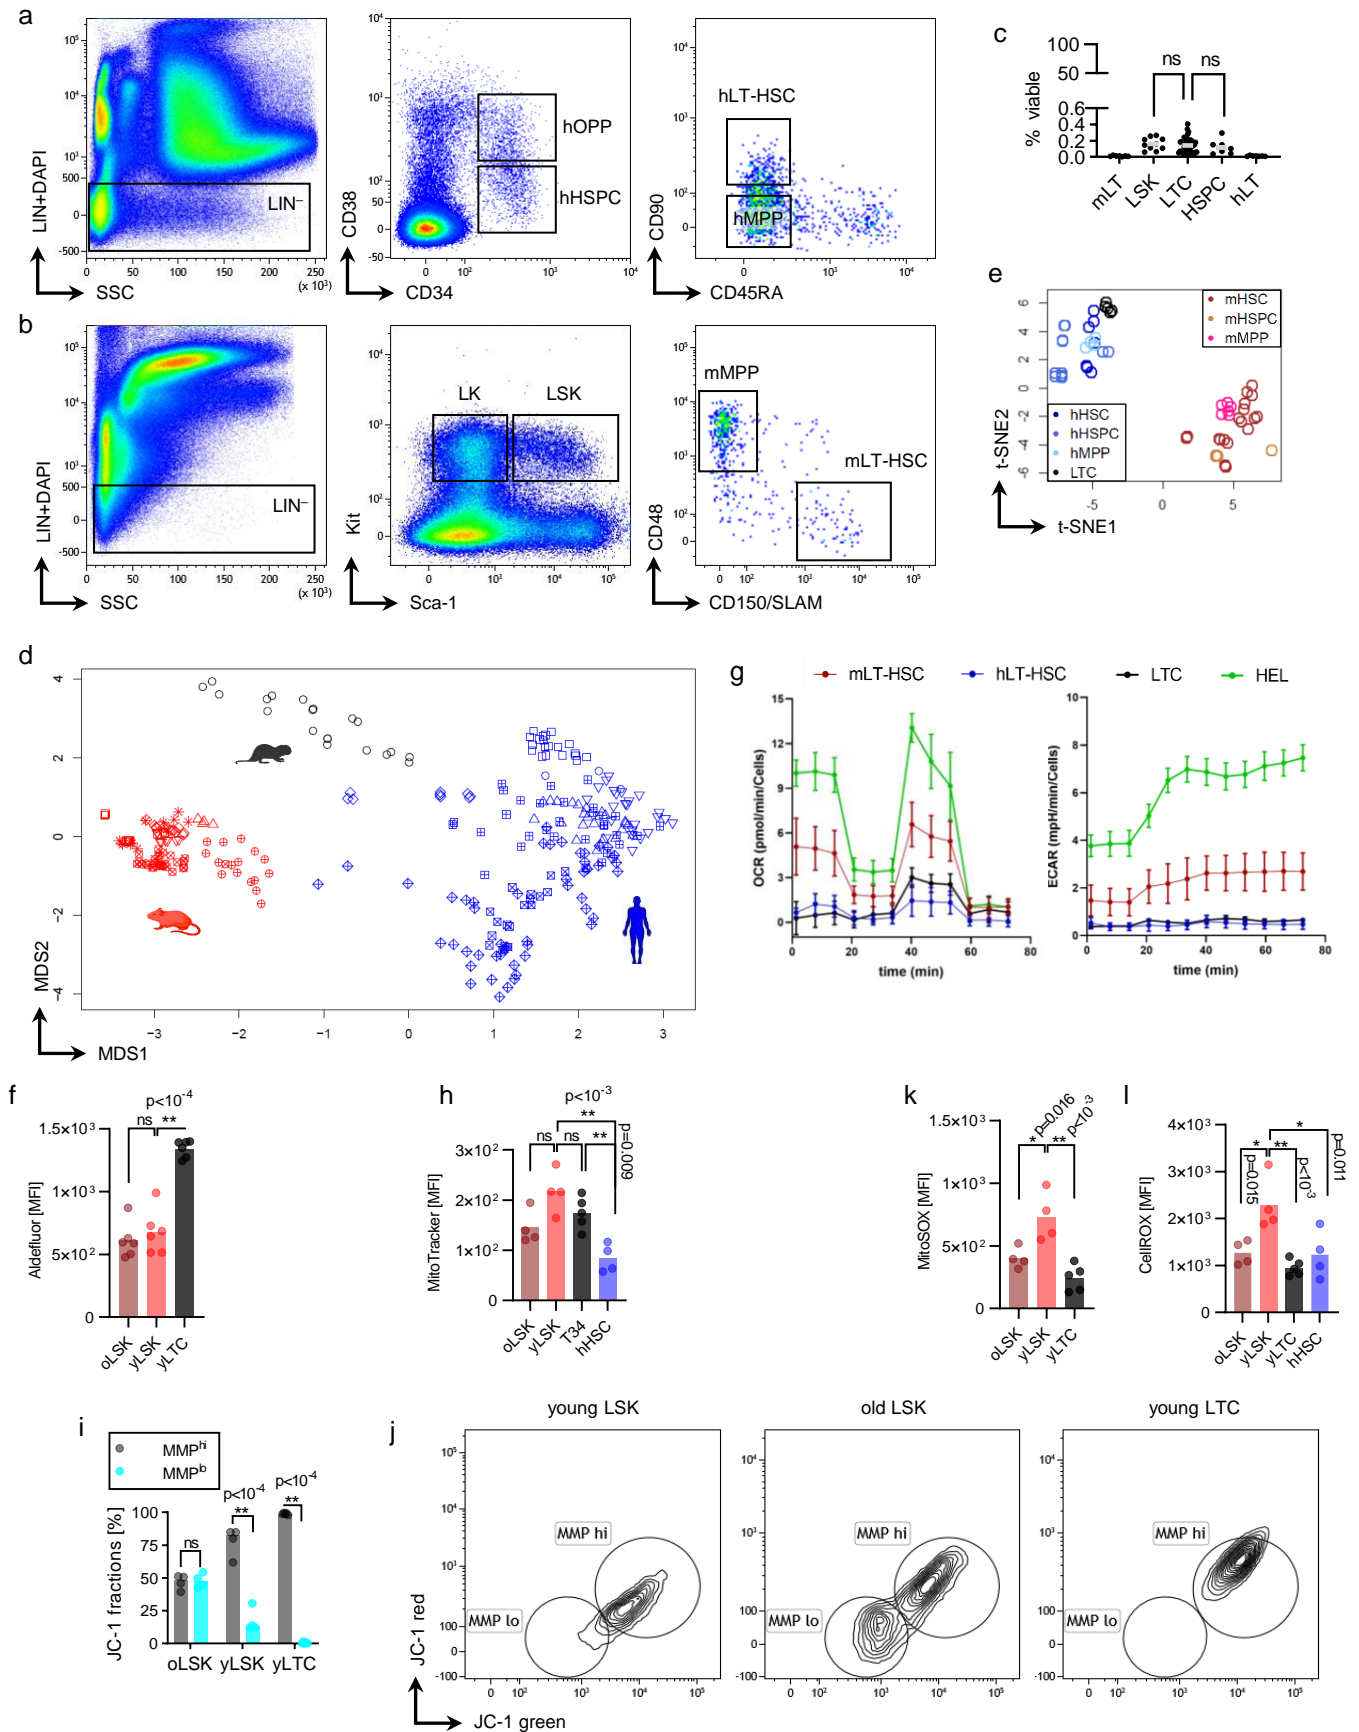

1565 **Fig. S8. Cross-species bulk RNA-Seq, Seahorse, MMP.**  
1566 **a**, Representative gating strategy for human BM with lineage cocktail (LIN;  
1567 CD3/CD14/CD16/CD19/CD20/CD56) to select LIN<sup>-</sup> cells [left]; gating LIN<sup>-</sup>/CD38<sup>lo</sup>/CD34<sup>+</sup>  
1568 human HSPCs or LIN<sup>-</sup>/CD38<sup>+</sup>/CD34<sup>+</sup> human oligopotent progenitors (hOPP) [middle]; gating  
1569 LIN<sup>-</sup>/CD38<sup>lo</sup>/CD34<sup>+</sup>/CD90<sup>+</sup>/CD45RA<sup>-</sup> long term LT-HSCs and LIN<sup>-</sup>/CD38<sup>lo</sup>/CD34<sup>+</sup>/CD90<sup>-</sup>  
1570 /CD45RA<sup>-</sup> multipotent progenitors (hMPP) [right]. **b**, Representative gating strategy for mouse  
1571 BM with lineage cocktail (LIN; Cd3e/Gr-1/Cd11b/B220/Ter-119) to select LIN<sup>-</sup> cells [left];  
1572 gating LIN<sup>-</sup>/Sca-1<sup>+</sup>/Kit<sup>+</sup> (LSK) and LIN<sup>-</sup>/Sca-1<sup>-</sup>/Kit<sup>+</sup> (LK) [middle]; LIN gate set to 10% viable  
1573 cells in a biplot analog to Figure 2A. **c**, Frequencies of BM HSC compartments between species.  
1574 Mouse mLT-HSC (n=7); mouse LSK (n=10); naked mole-rat LIN<sup>-</sup>/Thy1.1<sup>int</sup>/CD34<sup>+</sup>, LTC (n=47);  
1575 human HSPC (n=7); hLT-HSC (n=7); p-value determined by Dunnett's One-way ANOVA. **d**,  
1576 Unsupervised clustering by multi-dimensional scaling (MDS) of 299 bulk RNA-Seq samples.  
1577 Mouse, red (n=100); Human, blue (n=179); Naked mole-rat, black (n=20). See Table S6 for  
1578 sample metadata. **e**, Unsupervised clustering by t-distributed stochastic neighborhood embedding  
1579 (t-SNE) of Primitive stem and progenitors. hHSC, LIN<sup>-</sup>/CD34<sup>+</sup>/CD38<sup>lo</sup>/CD90<sup>+</sup>/CD45RA<sup>-</sup> (n=7);  
1580 hHSPC, LIN<sup>-</sup>/CD34<sup>+</sup>/CD38<sup>lo</sup> (n=11); hMPP, LIN<sup>-</sup>/CD34<sup>+</sup>/CD38<sup>lo</sup>/CD90<sup>-</sup>/CD45RA<sup>-</sup> (n=4);  
1581 mHSC, LIN<sup>-</sup>/Sca-1<sup>+</sup>/Kit<sup>+</sup>/CD150<sup>+</sup>/CD48<sup>-</sup> (n=25); mMPP, LIN<sup>-</sup>/Sca-1<sup>+</sup>/Kit<sup>+</sup>/CD150<sup>-</sup>/CD48<sup>+</sup>  
1582 (n=6); LTC, LIN<sup>-</sup>/Thy1.1<sup>int</sup>/CD34<sup>+</sup> (n=5). **f**, Mean Fluorescence Intensity (MFI) of Aldefluor  
1583 measurements (n=6); p-value determined by Tukey's One-way ANOVA. **g**, Seahorse XF Cell  
1584 Mito Stress Test profiles for HSPCs. HEL, human erythroleukemia cell line; used as positive  
1585 control on all assay plate run with different primary cells. **h**, MFI of Mitotracker Red staining in  
1586 mouse (n=4), human (n=4) and naked mole-rat BM (n=5); p-value determined by Tukey's One-  
1587 way ANOVA. **i**, Proportions of JC-1 mitochondrial membrane potential (MMP) populations  
1588 mouse (n=4; yLSK, 3 month old; oLSK, 24 month) and naked mole-rat (n=5) BM. p-value  
1589 determined by Sidak's Two-way ANOVA. **j**, Merged (composite analysis with all individual  
1590 samples concatenated into one dataset) JC-1 fluorescence biplots for young LSK (3m old, yLSK)  
1591 [right], old LSK (24m old, oLSK) [middle], young LTC (2-3yr old). MFI of **k**, MitoSOX or **l**,  
1592 CellROX from mouse (n=4), human (n=4) or naked mole-rat BM (n=5); p-value determined by  
1593 Tukey's One-way ANOVA.

Fig. S9

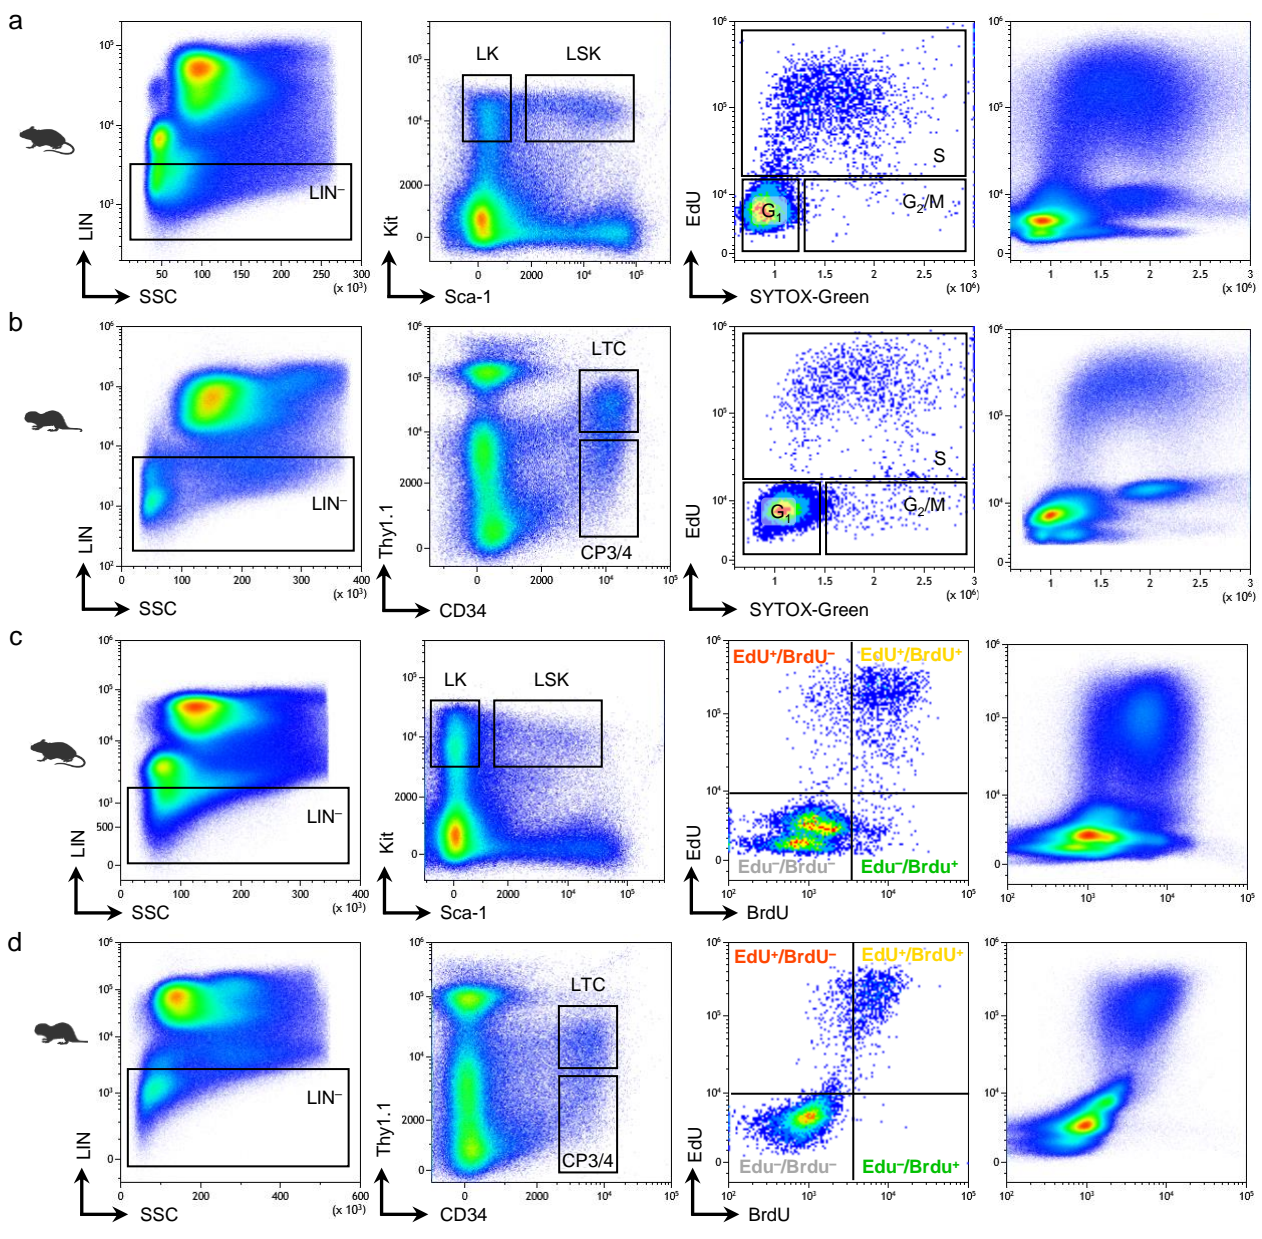

1594 **Fig. S9. Dual-Pulse FACS gating.**  
1595 For each species individual sample data was combined to one merged dataset to illustrate gating  
1596 and population patterns; mouse, n=7; naked mole-rat, n=5. Gating path for EdU/DNA-content cell  
1597 cycle analysis of **a**, mouse or **b**, naked mole-rat BM. Lineage depletion [left] used to enrich for  
1598 HSPCs and progenitors [2<sup>nd</sup> from left]; CP3/4, compound gate of CP3 and CP4, see Fig. 3c.  
1599 Specific gates for each cell cycle according to EdU-label and DNA content on mouse LSK or  
1600 naked mole-rat LTC [3<sup>rd</sup> from left]. EdU over DNA-content for all viable cells of the complete  
1601 mouse or naked mole-rat BM dataset, respectively [left]; Note that naked mole-rats featured less  
1602 S-phasing cells in whole marrow than mice. Gating path for EdU/BrdU analysis of **c**, mouse or **d**,  
1603 naked mole-rat BM. Lineage depletion [left] used to enrich for HSPCs and progenitors [2<sup>nd</sup> from  
1604 left]. Specific gates for each fluorescent fraction on mouse LSK or naked mole-rat LTC [3<sup>rd</sup> from  
1605 left]. EdU over BrdU for all viable cells of the complete mouse or naked mole-rat BM dataset,  
1606 respectively [left]; Note that naked mole-rat marrow lacks a EdU<sup>-</sup>/BrdU<sup>+</sup> population.
